# Supplementary material for: Are Combined Risk Factors Linked to In Vitro Fertilization Failure in Polycystic Ovary Syndrome? An Association Rule Mining Approach
Source: Research Square preprint supplement (doi:10.21203/rs.3.rs-7020094/v1), 2025-07-04
Supplement: Supplementary file 1 [file a2d9de892c2790b313005d92.xlsx]

## Sheet: Sheet1
iCI_ID	Age	Years of infertility	BMI	Type II Diabetes	Alpha Thalassemia	Secondary Infertility	Incomplete Septate Uterus	Bilateral Tubal Obstruction	Habitual Abortion	Subclinical Hypothyroidism	Ovarian Endometriotic Cyst	Luteinized Unruptured Follicle Syndrome (LUFS)	Right Cornual Adhesion (Post-Hysteroscopy)	Multiple Uterine Fibroids	Polycystic Ovary Syndrome (PCOS)	Pelvic Adhesion	Adnexal Mass (Undiagnosed)	Insulin Resistance	Hyperprolactinemia	Hypertension	Clinical Pregnancy
246284	36	3.9	19.78	0	0	1	0	1	0	0	0	1	0	0	0	0	0	0	0	0	0
220071	38	4	23.5	0	0	1	1	1	0	0	0	1	0	0	0	0	0	0	0	0	0
219667	37	7	18.67	0	0	1	1	0	0	0	0	1	0	1	0	0	0	0	0	0	0
211891	34	1.8	21.48	0	0	1	1	1	0	0	0	1	0	0	0	0	0	0	0	0	0
232866	38	7.2	16.42	0	1	1	0	1	0	1	0	1	0	0	0	0	0	0	0	0	0
213963	42	6	24.52	0	1	1	1	1	0	0	0	1	0	0	0	0	0	0	0	0	0
215216	38	5	17.78	0	0	1	1	1	0	0	0	0	0	0	1	1	0	0	0	0	0
207948	33	4	17.73	0	0	1	0	1	1	0	0	1	0	0	0	0	0	0	0	0	0
216514	34	6.6	25.78	0	0	1	1	1	0	0	0	1	0	0	0	1	0	0	0	0	0
208622	31	5	30.47	0	0	1	0	1	0	0	0	1	0	0	0	0	0	1	0	0	0
210433	36	10	29.14	0	0	1	0	1	0	0	0	1	0	0	0	0	0	0	0	0	0
217358	41	5.7	19.72	0	0	1	1	0	0	0	0	1	0	0	0	0	0	0	0	0	0
220057	38	0.5	26.9	0	0	0	0	1	0	0	0	1	0	0	0	0	0	0	0	0	1
214516	36	3.9	19.92	0	0	1	0	0	0	0	0	1	0	0	0	1	0	0	0	0	0
217437	42	5	29.14	0	0	1	0	1	0	1	0	1	0	0	0	0	0	0	0	0	0
213312	42	8	24.65	0	0	1	0	0	0	0	0	1	0	1	0	1	0	0	0	0	0
216961	35	4.9	20.96	0	0	1	0	1	0	0	0	0	0	1	1	0	0	0	0	0	1
210048	33	2	27.11	0	1	1	0	1	0	0	0	1	0	0	0	1	0	0	0	0	1
243684	35	2.5	22.67	0	1	1	0	1	0	0	0	1	0	0	0	0	0	0	0	0	0
217206	38	0.6	28	0	0	0	0	1	0	0	0	1	0	1	0	1	0	0	0	0	0
260340	36	4	26.3	0	0	1	0	1	0	0	0	1	0	0	0	0	0	0	0	0	0
217153	37	2	20.03	0	0	1	0	1	0	0	0	1	0	0	0	1	0	0	0	0	0
219059	34	1.5	26.08	0	0	1	1	0	0	0	0	1	0	0	0	1	0	0	0	0	0
219018	36	3.5	26.71	0	0	1	0	0	0	0	0	1	0	0	0	0	0	0	0	0	0
219907	35	3	19.81	0	0	1	1	0	0	0	1	1	0	0	0	0	0	0	0	0	1
216471	35	4	25.63	0	0	1	1	0	0	0	0	1	0	1	0	0	0	0	0	0	0
207554	39	3	26.04	0	0	1	1	1	0	0	0	1	0	0	0	1	0	0	0	0	0
218917	34	2.9	19.77	0	0	1	0	0	0	0	1	1	0	0	0	0	0	0	0	0	0
209233	29	11	23.62	0	0	1	1	0	0	0	0	1	0	0	0	0	0	0	0	0	0
212558	35	5	24.34	0	0	1	0	1	0	0	0	1	0	1	0	0	0	0	0	0	0
213925	38	3	24.65	0	0	1	1	0	0	0	0	1	0	0	0	1	0	0	0	0	1
209633	27	4	26.04	0	0	1	0	0	0	0	0	0	0	0	1	0	0	0	0	0	0
220760	29	3	23.88	0	0	1	1	1	0	1	0	1	0	0	0	0	0	0	0	0	0
214350	34	3	20.5	0	0	1	0	0	0	0	0	1	0	0	0	0	0	0	0	0	0
272242	34	3.5	22.19	0	0	1	1	1	0	0	0	1	0	0	0	0	0	0	0	0	1
241443	33	3.2	21.63	0	0	1	1	0	0	0	0	1	0	0	0	1	0	1	0	0	0
221535	37	3	21.48	0	0	1	0	1	0	0	0	1	0	0	0	0	0	0	0	0	0
219094	36	3	22.81	0	1	1	0	1	0	0	0	1	0	0	0	0	0	0	0	0	0
219445	30	2	21.09	0	0	1	0	0	0	0	1	1	0	0	0	0	0	0	0	0	1
194794	41	1	21.78	0	0	1	1	1	0	0	0	1	0	1	0	0	0	0	0	0	0
191044	41	13	26.84	0	0	1	1	0	0	0	0	1	0	0	0	1	0	0	0	0	0
192349	35	3	24.14	0	1	1	1	0	0	0	0	1	0	0	0	1	0	0	0	0	1
198410	35	2	21.02	0	0	1	1	0	0	0	0	1	0	0	0	1	0	0	0	0	1
191412	37	5.5	19.43	0	0	1	0	0	0	0	0	1	0	1	0	1	0	0	0	0	0
191824	33	4.5	21.09	0	0	1	0	0	0	0	0	1	1	0	0	1	0	0	0	0	0
190505	35	10	23.05	0	1	1	0	0	0	0	0	1	0	1	0	1	0	0	0	0	1
222127	36	6	20.69	0	0	1	1	0	0	0	0	1	0	0	0	0	0	0	0	0	0
207034	33	1.5	22.03	0	0	1	1	1	0	0	0	1	0	0	0	0	0	0	0	0	0
206398	34	6	24.67	0	0	1	0	1	0	0	0	1	0	0	0	1	0	0	0	0	0
200696	33	4	24.65	0	1	1	0	1	0	0	0	1	0	0	0	1	0	0	0	0	0
191003	33	6	22.27	0	0	1	0	1	0	0	0	1	0	0	0	1	0	0	0	0	0
221217	38	6	27.25	1	0	1	0	1	0	1	0	1	0	0	0	1	0	0	0	0	1
195462	38	1	24.8	0	1	1	1	0	0	0	0	1	0	0	0	1	0	0	0	0	0
206789	28	6	27.34	0	1	1	0	1	0	0	0	1	0	0	0	1	0	0	0	0	0
206348	44	5	22.35	0	0	1	1	1	0	0	0	1	0	0	0	0	0	0	0	0	0
190875	34	4	20.32	0	0	1	0	1	0	0	0	1	0	0	0	0	0	0	0	0	0
190137	46	18	26.37	0	0	1	0	0	0	0	0	1	0	0	0	1	0	0	0	0	0
194184	39	3	23.07	0	0	1	1	0	0	0	0	1	0	0	0	1	0	0	0	0	0
221014	40	5	23.07	0	0	1	1	1	0	1	0	1	0	0	0	0	0	0	0	0	0
190343	31	3	21.33	0	0	1	0	1	0	0	0	1	0	0	0	1	0	0	0	0	0
193235	39	4	32.05	0	0	1	1	1	0	0	0	1	0	0	0	1	0	0	0	0	0
206844	41	4	21.03	0	0	1	1	0	0	0	0	1	0	0	0	0	0	0	0	0	0
206564	33	0.6	20.4	0	0	0	1	0	0	0	0	1	1	0	0	0	0	0	0	0	0
195075	38	3	33.69	0	1	1	1	0	0	0	0	1	0	0	0	0	0	0	0	0	0
199727	25	4	20.13	0	0	1	1	0	0	0	0	1	0	0	0	0	0	0	0	0	0
190853	37	3	16.82	0	0	1	0	0	0	0	0	1	0	0	0	0	0	0	0	0	0
192797	28	3	21.78	0	0	1	1	0	0	0	0	1	0	0	0	1	0	0	0	0	0
190701	34	3	26.84	0	0	1	0	0	0	0	0	1	0	0	0	1	0	0	0	0	0
192134	28	0.4	23.52	0	0	1	1	0	0	0	0	1	0	0	0	0	0	0	0	0	1
192029	35	6	18.31	0	0	1	0	0	0	0	0	1	0	0	0	0	0	0	0	0	0
205504	36	3.8	23.42	0	0	1	1	1	0	0	0	1	0	1	0	1	0	0	0	0	0
194823	30	7	21.94	0	0	1	0	1	0	0	0	1	0	0	0	0	0	0	0	0	0
204700	38	3.5	26.35	0	1	1	0	1	0	0	0	1	0	0	0	1	0	0	0	0	1
192193	36	1	24.33	0	0	1	1	0	0	1	0	1	0	0	0	1	0	0	0	0	0
200120	34	3	22.67	0	0	1	0	0	0	0	0	1	0	0	0	1	0	0	0	0	0
194179	34	8	20	0	0	1	0	1	0	0	0	1	0	0	0	1	0	0	0	0	0
198342	31	2.6	20.03	0	0	1	1	0	0	0	0	1	0	0	0	1	0	0	0	0	0
193632	30	5	23.44	0	0	1	0	0	0	0	0	1	0	0	0	0	0	0	0	0	0
191610	35	1	19.91	0	0	1	0	0	0	0	0	1	0	1	0	1	0	0	0	0	0
190980	25	4	19.56	0	0	1	0	0	0	0	0	1	0	0	0	0	0	0	0	0	0
192798	34	2	22.86	0	1	1	1	0	0	0	0	1	0	1	0	1	0	0	0	0	0
190401	38	1	26.67	0	0	1	0	0	0	0	0	1	0	0	0	1	0	0	0	0	0
199504	36	2	22.19	0	0	1	0	0	0	0	0	1	0	0	0	1	0	0	0	0	0
200470	39	2	26.56	0	0	1	1	0	0	0	0	1	0	0	0	1	0	0	0	1	0
191303	28	4.2	23.68	0	0	1	1	0	0	0	0	1	1	0	0	1	0	0	0	0	0
191045	27	4	19.15	0	1	1	0	0	0	0	0	1	0	0	0	1	0	0	0	0	1
191132	33	2	21.23	0	0	1	1	0	0	0	0	1	0	0	0	1	0	0	0	0	0
190568	29	5	30.44	0	0	1	0	0	0	0	0	1	0	0	0	1	0	0	0	0	0
207380	27	0.3	19.88	0	1	0	0	1	1	0	0	1	0	0	0	1	0	0	0	0	0
197661	32	1	29.64	0	1	1	0	0	0	0	0	1	0	0	0	1	0	0	0	0	0
190526	35	1.5	23.83	0	0	1	1	0	0	0	0	1	0	1	0	1	0	0	0	0	0
206068	26	1.1	30.49	0	0	1	1	0	0	0	1	1	0	0	0	1	0	0	0	0	0
191359	24	3.3	23.66	0	0	1	0	0	0	0	0	1	0	0	0	1	0	0	0	0	0
197672	33	2.5	17.94	0	0	1	0	0	0	0	0	1	0	0	0	1	0	0	0	0	0
206835	31	2	20.13	0	0	1	0	0	0	0	0	1	0	0	0	1	0	0	0	0	0
179149	32	2	26.22	0	0	1	0	0	0	0	0	1	0	0	0	1	0	0	0	0	0
179173	32		19.53	0	0	1	0	0	0	0	0	1	0	0	0	1	0	0	0	0	0
179214	28	4	20.58	0	0	1	0	0	0	0	0	1	0	0	0	0	0	0	0	0	0
179228	29	3	28.44	0	0	1	0	0	0	0	0	1	0	0	0	1	0	0	0	0	0
179256	30	2	21.83	0	0	1	0	0	0	0	0	1	0	0	0	1	0	0	0	0	1
179272	35	2	23.44	0	0	1	1	0	0	0	0	1	0	0	0	1	0	0	0	0	0
179287	32	2	23.63	0	0	1	0	0	0	0	0	1	1	0	0	1	0	0	0	0	0
179158	36	4	22.03	0	0	1	0	0	0	0	0	1	0	1	0	1	0	0	0	0	1
179305	34	2	24.34	0	0	1	0	0	0	0	0	1	0	0	0	1	0	0	0	0	0
180352	34	2	24.34	0	0	1	0	0	0	0	0	1	0	0	0	1	0	0	0	0	1
179316	31	1	21.02	0	0	1	0	0	0	0	0	1	0	0	0	1	0	0	0	0	0
179323	29	6	22.31	0	0	1	0	0	0	0	0	1	0	0	0	0	0	0	0	0	0
179342	31	5	20.93	0	0	1	0	0	0	0	0	1	0	0	0	0	0	0	0	0	1
186280	32	5	20.93	0	0	1	1	0	0	0	0	1	0	0	0	1	0	0	0	0	0
179172	30	4	25.81	0	0	1	0	0	0	0	0	1	0	0	0	1	0	0	0	0	0
179116	26	4	23.56	0	0	1	0	0	0	0	1	1	0	0	0	1	0	0	0	0	0
179358	27	5	23.05	0	0	1	0	0	0	0	0	1	0	0	0	1	0	0	0	0	1
179369	27		20	0	0	1	0	0	0	0	0	1	0	0	0	1	0	0	0	0	1
179215	26	6	22.81	0	0	1	0	0	0	0	0	1	0	0	0	0	0	0	0	0	0
179390	32	8	20.23	0	0	1	0	0	0	0	0	1	0	0	0	1	0	0	0	0	0
181753	32	8.5	20.23	0	0	1	0	0	0	0	0	1	0	0	0	1	0	0	0	0	0
187982	33	0.3	20.23	0	0	1	0	0	0	0	0	1	0	0	0	1	0	0	0	0	0
179426	31	7	22.31	0	0	1	0	0	0	0	0	1	0	0	0	1	0	0	0	0	1
179254	39	17	22.86	0	0	1	0	0	0	0	0	1	0	0	0	1	0	0	0	0	0
179211	23	3	20.43	0	0	1	0	0	0	0	0	1	0	0	0	1	0	0	0	0	0
179456	34	1	21.63	0	0	1	0	0	0	0	0	1	0	0	0	1	0	0	0	0	0
188529	35	1	21.63	0	0	1	0	0	0	0	0	1	0	0	0	1	0	0	0	0	0
212300	37	6.4	21.63	0	0	1	0	1	0	0	0	1	0	0	0	0	0	0	0	0	0
179288	42	2	26.44	0	0	1	0	0	0	0	0	1	0	1	0	0	0	0	0	0	0
181128	42	3	26.44	0	1	1	0	0	0	0	0	1	0	1	0	0	0	0	0	0	0
179192	33	12	22.89	0	0	1	0	0	0	0	0	1	0	0	0	1	0	0	0	0	0
179306	28	3	22.19	0	0	1	0	0	0	0	0	1	0	0	0	1	0	0	0	0	0
181028	29	4	22.19	0	0	1	0	0	0	0	0	1	0	0	0	1	0	0	0	0	0
179351	21	1	16.44	0	0	1	0	0	0	0	0	1	0	0	0	1	0	0	0	0	0
179352	31	1	21.48	0	0	1	0	1	0	0	0	1	0	1	0	0	0	0	0	0	0
179516	25	9	20.81	0	0	1	0	0	0	0	1	1	0	0	0	1	0	0	0	0	0
179521	22	3	17.31	0	0	1	0	0	0	0	0	1	0	0	0	1	0	0	0	0	0
180105	32	3	22.22	0	0	1	0	0	0	0	0	1	0	0	0	1	0	0	0	0	1
179338	25	6	20.43	0	0	1	0	1	0	0	0	1	0	0	0	0	0	0	0	0	0
179533	30	4	20.66	0	0	1	0	0	0	0	0	1	0	0	0	1	0	0	0	0	0
179551	31	1	20.89	0	0	1	0	0	1	0	0	1	0	0	0	1	0	0	0	0	0
185090	32	1.8	20.89	0	0	1	0	0	0	0	0	1	0	0	0	1	0	0	0	0	0
179556	31	3	25.42	0	1	1	0	0	0	0	0	1	0	0	0	1	0	0	0	0	0
179382	28		19.86	0	0	0	0	0	0	0	0	1	0	0	0	1	0	0	0	0	0
179579	32	4	25.78	0	1	1	0	0	0	0	0	1	0	0	0	1	0	0	0	0	0
179593	32	4	24.02	0	0	1	0	0	0	0	0	1	0	0	0	1	0	0	0	0	0
179283	38	6	23.05	0	0	1	0	0	0	0	0	1	0	1	0	1	0	0	0	0	0
180902	39	7	23.05	0	0	1	0	0	0	0	0	1	0	1	0	1	0	0	0	0	1
179598	26	2	18.67	0	0	1	0	0	0	0	0	1	0	0	0	1	0	0	0	0	0
179603	32	5	20.24	0	0	1	0	1	0	0	0	1	0	0	0	0	0	0	0	0	0
182471	33	6	20.24	0	0	1	0	0	0	0	0	1	0	0	0	1	0	0	0	0	0
179616	30	3	19.17	0	1	1	0	0	0	0	0	1	0	0	0	1	0	0	0	0	1
179436	34	8	25.1	0	0	1	0	0	0	0	0	1	0	0	0	1	0	0	0	0	0
179620	40	8	19.33	0	1	1	0	0	0	0	0	1	0	0	0	1	0	0	0	0	0
179561	32	1	30.84	0	0	1	0	0	0	0	0	1	0	0	0	1	0	0	0	0	0
179628	33	3	23.88	0	1	1	0	0	0	0	0	1	0	0	0	1	0	0	0	0	0
179303	27	5	21.93	0	1	1	0	0	0	0	0	1	0	0	0	0	0	0	0	0	0
182004	28	6	21.93	0	1	1	0	0	0	0	0	1	0	0	0	0	0	0	0	0	0
179208	35	8	25.54	0	0	1	1	0	0	0	0	1	0	0	0	1	0	0	0	0	0
179371	30	2	23.24	0	0	1	0	0	0	0	0	1	0	0	0	1	0	0	0	0	1
179673	26	7	17.9	0	0	1	0	0	0	0	0	1	0	0	0	1	0	0	0	0	0
179481	27	4	17.67	0	0	1	0	0	0	0	0	1	0	0	0	1	0	0	0	0	1
179680	32	2	21.16	0	0	1	0	0	0	0	0	1	0	0	0	1	0	0	0	0	1
179635	25	3	21.23	0	0	1	0	0	0	1	0	1	0	0	0	1	0	0	0	0	0
180853	25	4	21.23	0	0	1	0	0	0	1	0	1	0	0	0	1	0	0	0	0	1
179508	29	7	23.15	0	0	1	0	0	0	0	0	1	0	0	0	1	0	0	0	0	0
183694	30	4	23.15	0	0	1	0	0	0	0	0	1	0	0	0	1	0	1	0	0	0
179538	26	7	23.44	0	0	1	0	0	0	0	0	1	0	0	0	1	0	0	0	0	0
179706	30	2	19.23	0	0	1	0	0	0	0	1	0	0	0	0	1	0	0	0	0	0
179705	31	4	21.16	0	0	1	0	0	0	0	0	1	0	0	0	1	0	0	0	0	0
180530	31	5	21.16	0	0	1	0	0	0	0	0	1	0	1	0	1	0	0	0	0	0
187897	32	5	21.16	0	0	1	0	0	0	0	0	1	0	1	0	1	0	0	0	0	0
179559	29	3	22.22	0	0	1	0	0	0	0	0	1	0	0	0	1	0	0	0	0	0
179720	32	3	21.09	0	0	1	0	0	0	0	1	1	0	0	0	1	0	0	0	0	0
179568	37	5	22.58	0	0	1	1	0	0	0	0	1	0	0	0	0	0	0	0	0	1
179636	28	4	23.07	0	0	1	0	0	0	0	0	1	0	0	0	0	0	0	0	0	1
179670	42	1	19.98	0	0	1	0	0	0	0	0	1	0	0	0	1	0	0	0	0	0
181072	43	1	19.98	0	0	1	0	0	0	0	0	1	0	0	0	1	0	0	0	0	0
179760	31	8	20.07	0	0	1	0	0	0	0	0	1	0	0	0	0	0	0	0	0	1
179539	32	4	28.76	0	0	1	0	0	0	0	0	1	0	0	0	1	0	0	0	0	1
179778	31	1	21.26	0	0	1	0	0	0	0	0	1	0	0	0	1	0	0	0	0	0
179781	26	2	22.04	0	0	1	0	0	0	0	0	1	0	0	0	1	0	0	0	0	0
220988	30	2.5	22.04	0	0	1	1	1	0	0	0	1	0	1	0	0	0	0	0	0	0
179672	24	4	20.28	0	0	1	0	0	0	0	0	1	0	0	0	1	0	0	0	0	0
179592	36	4	24.35	0	0	1	0	0	0	0	0	1	0	0	0	0	0	0	0	0	0
181866	36	5	24.35	0	0	1	0	0	0	0	0	1	0	0	0	0	0	0	0	0	0
179803	31	1	20.55	0	0	1	0	0	0	0	0	1	0	0	0	1	0	0	0	0	1
179793	31	3	26.67	0	0	1	0	0	0	0	0	1	0	0	0	1	0	0	0	0	1
179633	34	7	21.48	0	0	1	1	0	0	0	0	1	0	0	0	0	0	0	0	0	1
179821	24	1	24.34	0	1	1	0	0	0	0	1	1	0	0	0	1	0	0	0	0	0
179480	37	10	23.83	0	0	1	0	0	0	0	0	1	0	1	0	0	0	0	0	0	1
179542	32	4	22.48	0	0	1	1	0	0	0	0	1	0	1	0	1	0	0	0	0	0
182358	32	5	22.48	0	0	1	1	0	0	0	0	1	0	1	0	1	0	0	0	0	0
179843	34	2	22.22	0	0	1	0	0	0	0	0	1	0	0	0	1	0	0	0	0	0
179863	29	2	23.44	0	0	1	0	0	0	0	0	1	0	0	0	0	0	0	0	0	1
179744	35	3	23.37	0	0	1	0	0	0	0	0	1	1	0	0	1	0	0	0	0	0
179882	35	4	24.13	0	0	1	0	0	0	0	0	1	0	0	0	1	0	0	0	0	0
179888	30	1	22.84	0	0	1	0	0	0	0	0	1	0	0	0	1	0	0	0	0	0
179895	22	6	24.91	0	0	1	0	0	0	0	0	1	0	0	0	0	0	0	0	0	1
179894	30	6	26.26	0	0	1	0	0	0	0	0	1	0	0	0	1	0	0	0	0	0
185226	31	0.3	26.26	0	0	1	0	0	0	0	0	1	1	0	0	1	0	0	0	0	0
188954	31	0.7	26.26	0	0	1	0	0	0	0	0	1	1	0	0	1	0	0	0	0	0
179743	30	6	21.63	0	0	1	1	0	0	0	0	1	0	0	0	1	0	0	0	0	0
179618	43	3	20.24	0	0	1	0	0	0	0	1	1	0	1	0	1	0	0	0	0	0
181285	43	17	20.24	0	0	1	0	0	0	0	1	1	0	1	0	1	0	0	0	0	0
186197	44	17	20.24	0	0	1	0	0	0	0	1	1	0	1	0	1	0	0	0	0	0
179918	36	2	29.38	0	0	1	0	0	0	0	0	1	0	0	0	1	0	0	0	0	0
179797	31	4	21.63	0	0	1	0	0	0	0	0	1	0	0	0	0	0	0	0	0	0
179931	28	1	19.88	0	1	1	0	0	0	0	0	1	0	0	0	1	0	0	0	0	0
179956	32	3	22.64	0	0	1	0	0	0	0	0	1	0	0	0	1	0	0	0	0	1
179189	30	1	20.03	0	0	1	0	0	0	0	0	1	0	0	0	1	0	0	0	0	0
179601	32	2	17.78	0	0	1	0	0	0	0	0	1	0	0	0	0	0	0	0	0	1
179634	28	3	25.39	0	1	1	0	0	0	0	0	1	0	0	0	1	0	0	0	0	0
179398	39	8	29.33	0	1	1	1	0	0	0	1	1	0	0	0	1	0	0	0	0	1
179643	25	4	28.13	0	0	1	0	0	0	0	0	1	0	0	0	1	0	0	0	0	0
179735	31	3	22.94	0	0	1	0	0	0	0	0	1	0	0	0	1	0	0	0	0	0
179776	31	1	21.48	0	1	1	0	0	0	0	0	1	0	0	0	1	0	0	0	0	0
180036	34	2	20.03	0	0	1	1	0	0	0	0	1	0	0	0	1	0	0	0	0	0
180093	38	8	27.84	0	0	1	1	0	0	0	0	1	0	0	0	1	0	0	0	0	1
180104	32	2	20.5	0	0	1	0	0	0	0	0	1	0	0	0	1	0	0	0	0	1
204745	34	2	20.5	0	0	1	0	0	0	0	0	1	0	0	0	1	0	1	0	0	0
180166	26	2	20.55	0	0	1	0	0	0	0	0	1	0	0	0	0	0	0	0	0	0
180018	28	3	24.61	1	1	1	0	0	0	0	0	1	0	0	0	1	0	0	0	0	0
179709	36	3	20	0	0	1	0	0	0	0	0	1	0	1	0	0	0	0	0	0	0
179681	27	2	21.26	0	0	1	0	0	0	0	0	1	0	0	0	0	0	0	0	0	0
179999	35	11	24.97	0	0	1	0	0	0	0	0	1	0	0	0	1	0	0	0	0	0
179731	33	3	20.66	0	0	1	0	0	0	0	0	1	0	0	0	1	0	0	0	0	1
180053	29	2	19.23	0	0	1	0	0	0	0	0	1	0	1	0	1	0	0	0	0	0
180251	32	2	21.79	0	0	1	1	0	0	0	0	1	0	0	0	0	0	0	0	0	1
180267	27	7	22.48	0	0	1	0	0	0	0	0	1	0	0	0	1	0	0	0	0	0
179893	23	3	19.23	0	0	1	0	0	0	0	0	1	0	0	0	1	0	0	0	0	1
180000	31	5	23.42	0	0	1	0	0	0	0	0	1	0	0	0	1	0	0	0	0	0
180279	25	4	25.54	0	0	1	1	0	0	0	0	1	0	0	0	1	0	0	0	0	1
179905	30	6	27.55	0	0	1	0	0	0	0	0	1	0	0	0	1	0	0	0	0	0
180291	31	5	17.58	0	0	1	0	0	0	0	0	1	0	0	0	1	0	0	0	0	0
180017	34	10	20.51	0	1	1	0	0	0	0	0	1	0	0	0	1	0	0	0	0	0
180073	24	2	22.48	0	1	1	0	0	0	0	0	1	0	0	0	1	0	0	0	0	0
180055	34	8	27.43	0	0	1	0	0	0	0	0	1	0	0	0	1	0	0	0	0	0
185003	34	8	27.43	0	0	1	0	0	0	0	0	1	0	0	0	1	0	0	0	0	0
180078	27	2	22.04	0	0	1	0	0	0	0	0	1	0	0	0	1	0	0	0	0	0
180082	35	7	20.44	0	0	1	0	0	0	0	0	1	0	0	0	1	0	0	0	0	0
180395	30	6	26.57	0	0	1	0	0	0	0	0	1	0	0	0	1	0	0	0	0	0
180361	24	5	20.03	0	0	1	0	0	0	0	0	1	0	0	0	0	0	0	0	0	1
180214	26	2	17.24	0	0	1	0	0	0	0	0	1	0	0	0	1	0	0	0	0	0
180465	28	2	22.48	0	0	1	0	0	0	0	1	1	0	1	0	1	0	0	0	0	0
180510	34	3	25	0	0	1	1	0	0	0	0	1	0	1	0	1	0	0	0	0	0
179937	33	6	24.65	0	0	1	0	0	0	0	0	1	0	0	0	0	0	0	0	0	0
182698	33	7	24.65	0	0	1	0	0	0	0	0	1	0	0	0	0	0	0	0	0	0
180542	29	7	22.43	0	0	1	0	0	0	0	0	1	0	0	0	1	0	0	0	0	0
180058	29	4	19.31	0	0	1	0	0	0	0	0	1	0	0	0	1	0	0	0	0	0
180562	32	4	26.67	0	0	1	0	0	0	0	0	1	0	0	0	1	0	0	0	0	0
182795	32	4	26.67	0	0	1	0	0	0	0	0	1	0	0	0	1	0	0	0	0	0
180434	30	8	26.04	0	0	1	0	0	0	0	1	1	0	0	0	1	0	0	0	0	0
214699	34	2	22.04	0	0	1	0	1	0	0	0	1	0	0	0	0	0	0	0	0	0
179676	32	3	20.83	0	0	1	0	0	0	0	0	1	0	0	0	1	0	0	0	0	1
180589	36	6	22.03	0	0	1	0	0	0	0	0	1	0	0	0	1	0	0	0	0	0
180487	31	4	18.97	0	0	1	0	0	0	0	0	1	0	0	0	1	0	0	0	0	0
180654	30	3	24.01	0	0	1	1	0	0	0	1	1	0	0	0	0	0	0	0	0	1
180733	23	5	23.83	0	0	1	0	0	0	0	0	1	0	0	0	0	0	0	0	0	0
182569	25	6	32.87	0	1	1	0	0	0	0	0	1	0	0	0	1	0	0	0	0	1
179887	32	6	25.39	0	0	1	0	0	0	0	0	1	0	0	0	0	0	0	0	0	0
179439	28	6	19.77	0	0	1	0	0	0	0	0	1	0	0	0	1	0	0	0	0	1
180419	22	5	21.78	0	0	1	0	0	0	0	0	1	0	0	0	0	0	0	0	0	0
180521	36		22.35	0	0	0	0	0	1	0	0	1	0	0	0	1	0	0	0	0	0
179697	32	4	22.04	0	0	1	0	0	0	0	0	1	0	0	0	1	0	0	0	0	1
180821	32	9	21.88	0	0	1	0	0	0	0	0	1	0	0	0	0	0	0	0	0	0
180563	28	2	21.33	0	0	1	0	0	0	0	0	1	0	0	0	1	0	0	0	0	0
180859	29	1	19.98	0	0	1	0	0	0	0	0	1	0	0	0	1	0	0	0	0	0
181211	29	1.2	19.98	0	0	1	0	0	0	0	0	1	0	0	0	1	0	0	0	0	0
186544	30	3	19.98	0	0	1	0	0	0	0	0	1	0	0	0	1	0	0	0	0	0
180578	30	4	19.98	0	0	1	0	0	0	0	0	1	0	0	0	1	0	0	0	0	0
180368	32	2	19.86	0	0	1	0	0	0	0	0	1	1	0	0	1	0	0	0	0	0
180619	26	1	20.78	0	0	1	0	0	0	0	0	1	0	0	0	1	0	0	0	0	0
180875	32	3	22.15	0	0	1	1	0	0	0	0	1	0	0	0	1	0	0	0	0	0
180889	33	6	21.03	0	0	1	0	0	0	0	0	1	0	0	0	1	0	0	0	0	0
205001	35	7.5	21.03	0	0	1	0	1	0	0	0	1	0	0	0	1	0	0	0	0	0
180898	30	6	32.81	1	0	1	0	0	0	0	0	1	0	0	0	1	0	0	0	0	0
180209	29	2	22.06	0	0	1	0	0	0	0	0	1	0	0	0	1	0	0	0	0	0
180690	33	11	19.98	0	1	1	0	0	0	0	0	1	0	0	0	1	0	0	0	0	1
180922	33	8	21.94	0	0	1	0	0	0	0	0	1	0	0	0	1	0	0	0	0	0
182247	27	5	20.43	0	0	1	0	0	0	0	0	1	0	0	0	1	0	0	0	0	1
182264	24	6	29.59	0	0	1	0	0	0	0	0	1	0	0	0	1	0	0	0	0	0
182017	29	1	27.14	0	0	1	0	0	0	0	0	1	0	0	0	1	0	0	0	0	1
182268	34	11	25.08	0	1	1	0	0	0	0	0	1	0	0	0	1	0	0	0	0	1
182278	35	3.8	25.63	0	0	1	0	0	0	0	0	1	0	0	0	1	0	0	0	0	1
181697	35	7	24.3	0	0	1	0	0	0	0	1	1	0	1	0	1	0	0	0	0	1
181442	33	2	19.95	0	1	1	0	0	0	0	0	1	0	0	0	1	0	0	0	0	0
182281	29	8	26.37	0	1	1	0	0	0	0	0	1	0	0	0	1	0	0	0	0	0
182313	30	4	22.72	0	0	1	0	0	0	0	0	1	0	0	0	1	0	0	0	0	0
182309	35	4	27.68	0	0	1	0	0	0	0	0	1	0	0	0	1	0	0	0	0	1
180918	31	7	24.03	0	0	1	0	0	0	0	1	1	0	0	0	1	0	0	0	0	0
183105	32	7	24.03	0	0	1	0	0	0	0	1	1	1	0	0	1	0	0	0	0	1
180463	31	2	20.2	0	0	1	0	0	0	0	0	1	0	0	0	1	0	0	0	0	1
180727	31	2	23.11	0	1	1	0	0	0	0	0	1	0	0	0	1	0	0	0	0	0
180459	26	3	21.51	0	0	1	0	0	0	0	0	1	0	0	0	1	0	0	0	0	0
181023	29	1.5	20.61	0	0	1	0	0	0	0	0	1	0	0	0	1	0	0	0	0	0
179739	27	3	23.63	0	0	1	0	0	0	0	0	1	0	0	0	1	0	0	0	0	0
180636	39	1	26.37	0	0	1	0	0	0	0	0	1	0	0	0	0	0	0	0	0	0
180769	39	9	26.04	0	0	1	0	0	0	0	0	1	0	0	0	0	0	0	0	0	0
181058	27	4	19.78	0	0	1	0	0	0	0	0	1	0	0	0	1	0	0	0	0	0
194863	28	1	19.78	0	0	1	0	0	0	0	0	1	0	0	0	1	0	0	0	0	0
180541	23	3	22.72	0	0	1	0	0	0	0	0	1	0	0	0	1	0	0	0	0	0
181091	28	5	22.1	0	1	1	0	0	0	0	0	1	0	0	0	0	0	0	0	0	1
188981	29	1	22.1	0	1	1	0	0	0	0	0	1	0	0	0	0	0	0	0	0	0
181094	27	3	24.26	0	0	1	0	0	0	0	0	1	0	0	0	1	0	0	0	0	0
180515	29	2	22.94	0	0	1	0	0	0	0	0	1	0	0	0	1	0	0	0	0	0
180507	27	10	28.41	0	0	1	0	0	0	0	0	1	0	0	0	1	0	0	0	0	1
180804	28		19.01	0	0	0	0	0	0	0	0	1	0	0	0	1	0	0	0	0	1
180880	33	1	18.43	0	0	1	0	1	0	0	0	1	0	0	0	0	0	0	0	0	0
185556	33	1	18.43	0	0	1	0	1	0	0	0	1	0	0	0	0	0	0	0	0	0
180813	30	3	21.79	0	0	1	0	0	0	0	0	1	0	0	0	1	0	0	0	0	0
180652	33	3	16.44	0	0	1	0	0	0	0	0	1	1	0	0	1	0	0	0	0	0
181186	27	1.2	20.75	0	0	1	0	0	0	0	0	1	0	0	0	1	0	0	0	0	0
180788	32	4	20.43	0	0	1	0	0	0	0	0	1	0	0	0	1	0	0	0	0	0
188713	33	0.7	20.43	0	0	1	0	0	0	0	0	1	0	0	0	1	0	0	0	0	0
181075	33	10	24.44	0	0	1	0	0	0	0	0	1	0	0	0	1	0	0	0	0	0
180457	30	5	22.55	0	0	1	0	0	0	0	0	1	0	0	0	1	0	0	0	0	1
179588	35	1	19.22	0	1	1	0	0	0	0	0	1	0	0	0	0	0	0	0	0	0
180987	30	13	26.04	0	0	1	0	0	0	0	0	1	0	0	0	1	0	0	0	0	0
181251	29	4	19.53	0	0	1	0	0	0	0	0	1	0	0	0	0	0	0	0	0	0
181278	33	16	23.94	0	0	1	0	0	0	0	0	1	0	0	0	0	0	0	0	0	0
181282	29	3	25.56	0	0	1	0	0	0	0	0	1	0	0	0	0	0	0	0	0	0
181095	32	9	23.33	0	0	1	1	0	0	0	0	1	0	0	0	1	0	0	0	0	0
180802	33	3	23.73	0	0	1	0	0	0	0	0	1	0	0	0	1	0	0	0	0	0
181298	33	3	28.93	0	0	1	0	0	0	0	0	1	0	0	0	1	0	0	0	0	1
181261	28	1	25.28	0	0	1	0	0	0	0	0	1	0	0	0	1	0	0	0	0	0
180784	32	14	21.49	0	0	1	0	0	0	0	0	1	0	0	0	1	0	0	0	0	0
181328	29	3	20.96	0	0	1	0	0	0	0	0	0	0	0	1	1	0	0	0	0	1
213583	31	1.8	20.96	0	0	1	0	1	0	1	0	1	0	1	0	0	0	0	0	0	1
181175	27	5	17.45	0	0	1	0	0	0	0	0	1	0	0	0	0	0	0	0	0	0
181403	34	4	33.33	0	0	1	0	0	0	0	0	1	0	0	0	0	0	0	0	0	0
181052	36	2	22.51	0	0	1	0	0	0	0	0	1	0	0	0	1	0	0	0	0	1
181057	29	4	20.81	0	0	1	0	0	0	0	0	1	0	0	0	1	0	0	0	0	1
181383	34	4	21.45	0	0	1	0	0	0	0	0	1	0	0	0	1	0	0	0	0	0
181437	33	0.9	20.51	0	0	0	0	0	0	0	0	1	0	0	0	1	0	0	0	0	0
180893	32	11	18.16	0	0	1	0	0	0	0	0	1	0	0	0	0	0	0	0	0	0
180737	36	6	22.89	0	0	1	0	0	0	0	0	1	0	0	0	1	0	0	0	0	1
183767	27	5.7	29.05	0	0	1	0	0	0	0	0	1	0	0	0	0	0	0	0	0	0
180953	28	2	23.44	0	0	1	0	0	0	0	0	1	0	0	0	1	0	0	0	0	1
181185	21	5	24.44	0	0	1	0	0	0	0	0	1	0	0	0	1	0	0	0	0	0
180974	31	4	21.63	0	0	1	0	0	0	0	0	1	0	0	0	1	0	0	0	0	0
181491	26	2	24.14	0	0	1	0	1	0	0	0	1	0	1	0	0	0	0	0	0	0
181510	34	8.8	19.86	0	0	1	0	0	0	0	0	1	0	0	0	1	0	0	0	0	1
181514	21	1	18.67	0	0	1	0	0	0	0	0	1	0	0	0	1	0	0	0	0	1
181516	27	2	20.54	0	1	1	0	0	0	0	0	1	0	0	0	1	0	0	0	0	0
181552	27	3.5	20.67	0	0	1	0	0	0	0	0	1	0	0	0	1	0	0	0	0	0
181557	28	3	20.63	0	0	1	0	0	0	0	0	1	0	0	0	1	0	0	0	0	0
181273	27	5	19.95	0	0	1	0	1	0	0	0	1	0	0	0	0	0	0	0	0	0
186467	28	5	19.95	0	0	1	0	1	0	0	0	1	0	0	0	0	0	0	0	0	0
188033	28	7	26.44	0	0	1	0	0	0	0	0	1	0	0	0	1	0	0	0	0	0
181164	29	4	17.46	0	0	1	0	0	0	0	0	0	0	0	1	1	0	0	0	0	0
181600	33	3	20.55	0	0	1	0	0	0	0	0	1	0	0	0	1	0	0	0	0	0
181086	35	0.5	24.41	0	0	0	0	0	0	0	0	1	0	0	0	1	0	0	0	0	0
181610	25	3.4	22.64	0	0	1	0	0	0	0	1	1	0	0	0	1	0	0	0	0	0
181410	27	4	29.14	0	0	1	0	0	0	0	0	1	0	0	0	1	0	0	0	0	0
181577	28	2	28.44	0	0	1	0	0	0	0	0	1	0	0	0	1	0	0	0	0	1
181334	30	2	23.34	0	0	1	0	0	0	0	0	1	0	0	0	1	0	0	0	0	1
181689	32	2	21.64	0	0	1	0	0	0	1	0	1	1	0	0	1	0	0	0	0	1
181100	36	5.5	30.18	0	1	1	0	0	0	0	0	1	0	0	0	1	0	0	0	0	0
181696	29	2	18.08	0	1	1	0	0	0	0	0	1	0	0	0	1	0	0	0	0	1
181725	29	3	19.23	0	0	1	0	0	0	0	0	1	0	0	0	0	0	0	0	0	1
181227	25	2	22.27	0	0	1	0	1	0	0	0	1	0	0	0	0	0	0	0	0	0
181735	29	7	30.48	0	0	1	0	0	0	0	0	1	0	0	0	1	0	0	0	0	0
181750	30	4	21.48	0	0	1	0	0	0	0	0	1	0	0	0	1	0	0	0	0	0
181512	27	4	21.08	0	0	1	0	0	0	0	0	1	0	0	0	1	0	0	0	0	0
180715	38	3	18.8	0	0	1	0	0	0	0	0	1	0	0	0	0	0	0	0	0	1
180420	34	3	28.44	0	0	1	0	0	0	0	0	1	0	1	0	1	0	0	0	0	0
181773	31	5	28.04	0	0	1	0	0	0	0	0	1	0	0	0	1	0	0	0	0	0
181525	25	5	19.44	0	1	1	0	0	0	0	0	1	0	0	0	1	0	0	0	0	0
181777	36	12	22.6	0	0	1	0	0	0	0	0	1	0	0	0	1	0	0	0	0	0
181336	37	5	24.97	0	1	1	0	0	0	0	0	1	0	0	0	0	0	0	0	0	0
181787	30	0.5	23.44	0	0	0	0	0	0	0	0	1	0	0	0	1	0	0	0	0	0
181103	38	2	23.56	0	0	1	0	0	0	0	1	1	0	1	0	1	0	0	0	0	0
183931	38	2	23.56	0	0	1	0	0	0	0	1	1	0	1	0	1	0	0	0	0	0
181673	29	8	25.64	0	0	1	0	0	0	0	0	1	0	0	0	1	0	0	0	0	0
181545	41	5	23.53	0	1	1	0	0	0	0	1	1	0	0	0	1	0	0	0	0	0
198741	43	7	23.53	0	1	1	0	0	0	0	1	1	0	1	0	1	0	0	0	0	0
181284	32	6	18.66	0	0	1	0	0	0	0	0	1	0	0	0	0	0	0	0	0	0
181597	31	3	17.97	0	1	1	0	0	0	0	0	1	0	0	0	1	0	0	0	0	0
181661	31	6	16.6	0	0	1	0	0	0	0	0	1	0	0	0	1	0	0	0	0	0
181319	31	5	21.76	0	0	1	0	0	0	0	0	1	0	0	0	1	0	0	0	0	0
181896	29	8	19.01	0	0	1	0	0	0	0	0	1	0	0	0	1	0	0	0	0	0
181613	35	2	32.46	0	0	1	0	0	0	0	0	1	0	0	0	1	0	0	0	0	0
194586	33	5	19.4	0	0	1	0	1	0	0	0	1	0	0	0	1	0	0	0	0	0
181918	33	6	24.14	0	0	1	0	0	0	0	0	1	0	0	0	1	0	0	0	0	1
180891	28	6	28.52	0	0	1	0	0	0	0	0	1	0	0	0	1	0	0	0	0	0
180789	30	7	25.07	0	0	1	0	0	0	0	0	1	0	0	0	0	0	0	0	0	0
184722	30	7	25.07	0	0	1	0	0	0	0	0	1	0	0	0	0	0	0	0	0	0
181961	37	13	23.83	0	0	1	0	0	0	0	0	1	0	0	0	0	0	0	0	0	0
181963	23	3	19.1	0	0	1	0	0	0	0	0	1	0	0	0	1	0	0	0	0	0
181974	30	7	24.03	0	0	1	0	0	0	0	0	1	0	0	0	1	0	0	0	0	0
184801	31	7	24.03	0	0	1	0	0	0	0	0	1	0	0	0	1	0	0	0	0	0
181977	30	1	22.22	0	0	1	0	0	0	0	0	1	0	0	0	1	0	0	0	0	0
181985	37	4	23.22	0	0	1	0	0	0	0	0	1	0	1	0	1	0	0	0	0	0
181990	36	11	22.6	0	0	1	0	0	0	0	0	1	0	1	0	1	0	0	0	0	1
181988	26	5	24	0	0	1	0	0	0	0	0	1	0	0	0	1	0	0	0	0	0
185075	26	5	24	0	0	1	0	0	0	0	0	1	0	0	0	1	0	0	0	0	0
188124	27	6	24	0	0	1	0	0	0	0	0	1	0	0	0	1	0	0	0	0	0
181994	40	5	24.03	0	0	1	1	0	0	0	0	1	0	1	0	1	0	0	0	0	0
181847	31	3	25.2	0	1	1	0	0	0	0	0	1	0	0	0	1	0	0	0	0	1
182010	29	0.6	24.03	0	0	0	0	0	0	0	0	1	0	0	0	1	0	0	0	0	1
182016	33	7	22.68	0	0	1	0	0	0	0	0	1	0	1	0	1	0	0	0	0	1
182046	29	4.2	24.44	0	0	1	0	0	0	0	0	1	0	0	0	1	0	0	0	0	1
182051	36	3	24.41	0	1	1	0	0	0	0	0	1	0	0	0	0	0	0	0	0	0
186914	36	4	24.41	0	1	1	0	0	0	0	0	1	0	0	0	0	0	0	0	0	0
208597	38	1.2	24.41	0	1	1	0	1	0	0	0	1	0	0	0	1	0	0	0	0	0
181438	34	6	32.44	0	0	1	0	0	0	0	0	1	0	0	0	1	0	0	0	0	1
181778	25	4	19.4	0	0	1	0	0	0	0	0	1	0	0	0	1	0	0	0	0	0
182078	31	5	28.19	0	0	1	0	0	0	0	0	1	0	1	0	1	0	0	0	0	0
182083	31	7	21.26	0	1	1	0	0	0	0	0	1	0	0	0	0	0	0	0	0	0
182099	26	8	22.64	0	1	1	0	0	0	0	0	1	0	0	0	1	0	0	0	0	1
182116	34	2.5	20.03	0	1	1	1	1	0	0	0	1	0	0	0	0	0	0	0	0	0
182124	41	7	28.55	0	0	1	0	0	0	0	0	1	0	0	0	1	0	0	0	0	0
184572	41	7.5	28.55	0	0	1	0	0	0	0	0	1	0	0	0	1	0	0	0	0	0
181237	32	4	23.73	0	0	1	0	0	0	0	0	1	0	0	0	1	0	0	0	0	0
181283	29	1.5	23.42	0	0	1	0	0	0	0	0	1	1	0	0	0	0	0	0	0	0
180464	24	8	22.21	0	0	1	1	0	0	0	0	1	0	0	0	1	0	0	0	0	0
200039	26	10	22.21	0	0	1	1	0	0	0	0	1	0	0	0	1	0	0	0	0	0
182188	27	2.5	20.7	0	0	1	0	0	0	0	0	1	0	0	0	1	0	0	0	0	0
181605	27	2	24.65	0	0	1	0	0	0	0	0	1	0	0	0	1	0	0	0	0	0
181652	31	7	23.81	0	0	1	0	0	0	0	0	1	0	1	0	1	0	0	0	0	1
181907	36	0.6	16.94	0	0	0	0	0	0	0	0	1	0	0	0	1	0	0	0	0	0
182232	39	21	26.49	0	0	1	0	0	0	0	0	1	0	0	0	1	0	0	0	0	0
185244	39	21	26.49	0	0	1	0	0	0	0	0	1	0	0	0	1	0	0	0	0	0
193197	40	22	26.49	0	0	1	0	0	0	0	0	1	0	0	0	1	0	0	0	0	0
181938	34	1.5	31.6	0	0	1	1	0	0	0	0	1	0	1	0	1	0	0	0	0	0
181700	26	2	21.85	0	0	1	0	0	0	0	0	1	0	0	0	1	0	0	0	0	0
182345	32	5	27.41	0	1	1	0	0	0	0	0	1	0	0	0	1	0	0	0	0	0
188242	33	5	27.41	0	1	1	0	0	0	0	0	1	0	0	0	1	0	0	0	0	0
181699	30	2.2	20.55	0	0	1	0	0	0	0	0	1	0	0	0	1	0	0	0	0	0
182126	34	0.8	24.56	0	0	0	1	0	0	0	0	1	0	0	0	1	0	0	0	0	0
196570	36	2	24.56	0	0	1	1	0	0	0	0	1	0	0	0	1	0	0	0	0	0
181741	26	3	24.56	0	0	1	0	0	0	0	1	1	0	0	0	1	0	0	0	0	0
181411	31	1	22.94	0	0	1	0	0	0	0	0	1	0	1	0	1	0	0	0	0	0
181834	33	6	21.3	1	0	1	0	0	0	0	0	1	0	0	0	1	0	0	0	0	0
181530	36	4	18.95	0	0	1	0	0	0	0	0	1	0	0	0	1	0	0	0	0	1
181914	39	2	29.17	0	0	1	1	0	0	0	0	1	0	0	0	1	0	0	0	0	0
182167	31	0.6	21.88	0	1	0	0	0	0	0	0	1	0	0	0	1	0	0	0	0	0
181927	29	1.5	21.11	0	0	1	0	0	0	0	0	1	0	0	0	1	0	0	0	0	0
181193	36	1	22.22	0	0	1	0	0	0	0	0	1	0	0	0	1	0	0	0	0	0
182481	24	1.7	17.97	0	0	1	0	0	0	0	0	1	0	0	0	1	0	0	0	0	0
182229	33	1	20.7	0	0	1	0	0	0	0	0	1	0	0	0	0	0	0	0	0	0
182500	28	1	22.67	0	0	1	0	1	0	0	0	1	0	0	0	0	0	0	0	0	0
182519	26	6.5	24.89	0	1	1	0	0	0	0	0	1	0	0	0	1	0	0	0	0	0
182289	34	0.8	23.61	0	0	0	0	0	0	0	0	1	0	0	0	1	0	0	0	0	1
182551	27	2	18.49	0	0	1	0	0	0	0	0	1	0	0	0	1	0	0	0	0	0
182560	30	0.9	21.03	0	0	1	0	0	0	0	0	0	0	0	1	1	0	0	0	0	0
200607	31	2.5	21.03	0	0	1	0	0	0	0	0	1	0	0	0	1	0	0	0	0	0
182563	34	2	24.65	0	0	1	0	0	0	0	0	1	0	0	0	1	0	0	0	0	1
182559	33	7	30.3	0	0	1	1	0	0	0	0	1	0	0	0	1	0	0	0	0	0
182329	26	3	19.56	0	0	1	0	0	0	0	0	1	0	0	0	1	0	0	0	0	1
181949	27	5	18.23	0	0	1	0	0	0	0	0	1	0	0	0	1	0	0	0	0	0
182177	25	0.4	17.97	0	0	0	0	0	0	0	0	1	0	0	0	1	0	0	0	0	1
181997	31	3	27.89	0	1	1	0	0	0	0	0	1	0	0	0	1	0	0	0	0	0
182635	31	2.5	21.08	0	0	1	0	0	0	0	0	1	0	0	0	1	0	0	0	0	0
186404	31	2.5	21.08	0	0	1	0	1	0	0	0	1	0	0	0	1	0	0	0	0	0
182647	30	10	25.97	0	0	1	0	0	0	0	0	1	0	0	0	1	0	0	0	0	0
182657	33	6	28.71	0	0	1	0	0	0	0	0	1	0	0	0	1	0	0	0	0	0
187969	33	6	28.71	0	0	1	0	1	0	0	0	1	0	0	0	0	0	0	0	0	0
182679	41	5	26.99	0	0	1	0	0	0	0	0	0	0	0	1	1	0	0	0	0	0
182700	30	4	20.7	0	0	1	0	0	0	0	0	1	0	0	0	1	0	0	0	0	0
182709	31	3	20.81	0	0	1	0	0	0	0	0	1	0	0	0	1	0	0	0	0	0
182701	31	1.5	21.03	0	1	1	0	0	0	0	0	1	0	0	0	1	0	0	0	0	1
182719	30	3	26.67	0	0	1	0	0	0	0	0	1	0	0	0	1	0	0	0	0	1
188614	30	4	26.67	0	0	1	0	0	0	0	0	1	0	0	0	1	0	0	0	0	1
182748	24	5	18.03	0	0	1	0	0	0	0	0	1	0	0	0	1	0	0	0	0	0
182499	26	4	27.69	0	0	1	0	0	0	0	0	1	0	0	0	0	0	0	0	0	0
182783	25	2	20.7	0	1	1	0	0	0	0	1	1	0	0	0	1	0	0	0	0	1
180094	34	9	27.24	0	0	1	0	0	0	0	0	1	0	1	0	1	0	0	0	0	0
182677	25	3	26.04	0	0	1	0	0	0	0	0	1	0	0	0	1	0	0	0	0	1
182494	34	2	19.48	0	0	1	0	0	0	0	0	1	0	0	0	1	0	0	0	0	0
182185	32	11	29.3	0	1	1	0	0	0	0	0	1	0	0	0	1	0	0	0	0	0
182595	27	3	20	0	0	1	0	0	0	0	0	1	0	0	0	1	0	0	0	0	0
182311	35	6	22.48	0	0	1	0	0	0	0	0	1	0	0	0	1	0	0	0	0	0
182121	29	3.8	19.11	0	0	1	0	0	0	0	0	1	0	0	0	1	0	0	0	0	0
182889	27	0.5	20.2	0	0	1	0	0	0	0	0	1	0	0	0	1	0	0	0	0	0
182310	27	2	21.48	0	0	1	1	0	0	0	0	1	0	0	0	1	0	0	0	0	0
182903	29	3	18.37	0	1	1	0	0	0	0	0	1	0	0	0	1	0	0	0	0	0
182571	40	2	25.2	0	0	1	0	0	0	0	0	1	0	0	0	1	0	0	0	0	0
182582	35	8	21.09	0	0	1	0	0	0	0	1	1	0	0	0	1	0	0	0	0	1
182941	29	3	26.56	0	0	1	0	0	0	0	0	1	0	0	0	1	0	0	0	0	0
181748	30	7	22.22	0	1	1	0	0	0	0	0	1	0	0	0	1	0	0	0	0	0
182359	36	13	17.83	0	1	1	0	0	0	0	0	1	0	0	0	1	0	0	0	0	1
183013	28	1	24.39	0	0	1	0	0	0	0	0	1	0	0	0	1	0	0	0	0	0
182662	29	3	22.03	0	0	1	0	0	0	0	0	0	0	0	1	1	0	0	0	0	0
182802	28		23.06	0	0	1	0	0	0	0	1	1	0	0	0	1	0	0	0	0	0
182395	33	8	30.04	0	1	1	0	0	0	0	0	0	0	0	1	1	0	0	0	0	0
182484	36	3	19.53	0	0	1	0	0	0	0	0	1	0	0	0	1	0	0	0	0	0
183128	26	2	21.36	0	0	1	0	0	0	0	0	1	0	0	0	0	0	0	0	0	0
183133	32	8.5	24.14	0	0	1	0	0	0	0	0	1	0	0	0	1	0	0	0	0	0
182813	34	4	22.63	0	0	1	0	0	0	0	0	1	0	0	0	1	0	0	0	0	0
182816	29	1	24.61	0	0	1	1	0	0	0	0	1	0	0	0	1	0	0	0	0	0
183159	33	8	21.63	0	0	1	0	0	0	0	0	1	0	0	0	1	0	0	0	0	1
183153	29	5.1	19.05	0	0	1	0	0	0	0	0	1	0	0	0	0	0	0	0	0	0
182646	38	3	20.96	0	0	1	0	0	0	0	0	1	0	0	0	1	0	0	0	0	0
183216	23	8	25.39	0	0	1	0	0	0	0	0	1	0	0	0	1	0	0	0	0	0
182586	29	4	21.33	0	0	1	0	0	0	0	0	1	0	0	0	0	0	0	0	0	0
183025	36	5	28.3	0	0	1	0	0	0	0	0	1	0	0	0	1	0	0	0	1	0
183306	33	5	28.89	0	0	1	0	0	0	0	1	1	0	1	0	1	0	0	0	0	0
182976	24	4	24.78	0	1	1	0	0	0	0	0	1	0	0	0	1	0	0	0	0	0
183193	24	2.5	19.53	0	0	1	0	0	0	0	1	1	0	0	0	1	0	0	0	0	0
183321	33	1	18.07	0	1	1	0	0	0	0	0	1	0	0	0	1	0	0	0	0	1
182767	30	9	23.34	0	1	1	0	0	0	0	0	1	0	0	0	1	0	0	0	0	0
182867	24	5.5	24.35	0	0	1	0	0	0	0	0	1	0	0	0	1	0	0	0	0	0
183221	36	10	27.78	0	0	1	0	0	0	0	0	1	0	0	0	1	0	0	0	0	0
218482	38	16	24.44	0	0	1	1	0	0	0	0	1	0	0	0	0	0	0	0	0	1
183090	28	6	23.78	0	0	1	0	0	0	0	0	1	0	0	0	1	0	0	0	0	0
183012	35	3	16.6	0	0	1	0	0	0	0	0	1	0	0	0	1	0	0	0	0	0
183422	25	2.8	25.33	0	0	1	0	0	0	0	0	1	0	0	0	1	0	0	0	0	1
182858	27	2	18.07	0	0	1	0	0	0	0	0	1	0	0	0	1	0	0	0	0	0
183478	33	6.5	22.94	0	1	1	0	0	0	0	0	1	0	0	0	1	0	0	0	0	1
183517	33	7	18.29	0	0	1	0	0	0	0	0	1	0	0	0	1	0	0	0	0	0
183535	27	11	24.46	0	0	1	0	0	0	0	1	1	0	0	0	1	0	0	0	0	0
183538	29	6	21.91	0	0	1	0	0	0	0	0	1	0	0	0	1	0	0	0	0	0
205941	31	8	21.91	0	0	1	0	0	0	0	0	1	0	0	0	1	0	0	0	0	0
183318	28	1.8	19.15	0	1	1	0	0	0	0	0	1	0	0	0	1	0	0	0	0	0
182908	36	6	24.09	0	0	1	0	0	0	0	0	1	0	1	0	1	0	0	0	0	0
183542	28	10	21.91	0	1	1	0	0	0	0	0	1	0	0	0	0	0	0	0	0	0
186425	28	10	21.91	0	1	1	0	0	0	0	0	1	0	0	0	0	0	0	0	0	1
206133	30	1	21.91	0	1	1	0	1	0	0	0	1	0	0	0	1	0	0	0	0	1
183228	30	0.7	30.61	0	0	1	1	0	0	0	0	1	0	0	0	1	0	0	0	0	0
182817	22	3	23.23	0	0	1	0	0	0	0	0	1	0	0	0	1	0	0	0	0	0
183249	34	0.7	26.04	0	0	1	0	0	0	0	0	1	1	0	0	1	0	0	0	0	0
183594	32	4	26.14	0	1	1	1	0	0	0	0	1	0	0	0	1	0	0	0	0	0
182669	41	2.2	24.24	0	0	1	1	0	0	0	0	1	0	0	0	0	0	0	0	0	1
180488	33	9	24.97	0	0	1	0	0	0	0	0	1	0	1	0	1	0	0	0	0	0
183095	42	5	24	0	0	1	0	0	0	0	0	1	0	0	0	1	0	0	0	0	0
187682	43	7	24	0	0	1	0	0	0	0	0	1	0	0	0	1	0	0	0	0	0
182781	27	4	26.71	0	0	1	0	0	0	0	0	1	0	0	0	1	0	0	0	0	1
183469	28	2.3	24.97	0	0	1	0	0	0	1	0	1	0	0	0	0	0	0	0	0	0
183667	39	2	25.28	0	0	1	1	0	0	0	0	1	0	0	0	1	0	0	0	0	0
186776	39	2	25.28	0	0	1	1	0	0	0	0	1	0	0	0	1	0	0	0	0	0
183670	32	3	22.27	0	0	1	0	0	0	0	0	1	0	0	0	1	0	0	0	0	0
185545	32	3	22.27	0	0	1	0	0	0	0	0	1	0	0	0	1	0	0	0	0	0
183676	36	0.8	21.78	0	0	1	0	0	0	0	0	1	0	0	0	1	0	0	0	0	0
200286	38	11	21.78	0	0	1	0	0	1	0	0	1	1	1	0	1	0	0	0	0	0
183625	37	3	22.89	0	1	1	0	0	0	0	0	1	0	0	0	1	0	0	0	0	0
208414	39	0.58	22.89	0	1	1	0	1	0	0	0	1	0	0	0	0	0	0	0	0	0
221570	40	1	22.89	0	1	1	0	1	0	0	0	1	0	0	0	0	0	0	0	0	1
183407	27	1.6	22.89	0	0	1	0	1	0	0	0	1	0	0	0	0	0	0	0	0	0
183479	35	2	24.75	0	0	1	0	0	0	0	1	1	0	0	0	1	0	0	0	0	0
183808	30	8.6	25.04	0	0	1	0	0	0	0	0	1	0	0	0	1	0	1	0	0	0
183107	27	10	24.02	0	1	1	0	0	0	0	0	1	0	0	0	1	0	0	0	0	0
183588	28	8	22.62	0	0	1	0	0	0	0	0	1	0	0	0	0	0	0	0	0	0
179864	33	0.5	26.04	0	0	1	0	0	0	0	0	1	0	0	0	1	0	0	1	0	0
182655	39	9	24.8	0	0	1	0	0	0	0	0	1	0	0	0	1	0	0	0	0	0
187431	40	10	24.8	0	0	1	0	1	0	0	0	1	0	0	0	0	0	0	0	0	0
189838	40	10	24.8	0	0	1	0	1	0	0	0	1	0	0	0	0	0	0	0	0	0
183926	27	6	23.88	0	0	1	0	0	0	0	0	1	0	0	0	1	0	0	0	0	1
182707	29	3.4	17.63	0	0	1	0	0	0	0	0	1	0	0	0	1	0	0	0	0	0
183728	30	3	26.99	0	0	1	0	0	0	0	0	1	0	0	0	1	0	0	0	0	0
183970	32	2.9	20.55	0	0	1	0	1	0	0	0	1	0	0	0	0	0	0	0	0	0
183252	24	0.9	21.64	0	0	0	0	0	0	0	0	1	0	0	0	1	0	0	0	0	0
183738	31	6	17.48	0	1	1	0	0	0	0	0	1	0	0	0	1	0	0	0	0	0
184021	40	3	21.23	0	0	1	0	0	0	0	1	1	0	0	0	1	0	0	0	0	0
184044	29	6	18.37	0	0	1	0	0	0	0	0	1	0	0	0	0	0	0	0	0	0
187339	30	6	18.37	0	0	1	0	0	0	0	0	1	0	0	0	0	0	0	0	0	1
184054	34	3	22.04	0	0	1	0	0	0	0	0	1	0	0	0	1	0	0	0	0	0
183800	31	3	20.7	0	0	1	0	0	0	0	0	0	0	0	1	1	0	0	0	0	1
184109	26	1	27	0	0	1	0	0	0	0	0	1	0	0	0	1	0	0	0	0	0
184142	38	12	23.63	0	1	1	0	0	0	0	0	1	0	0	0	1	0	0	0	0	1
183725	21	2	23.03	0	0	1	0	0	0	0	0	1	0	0	0	1	0	0	0	0	0
183849	36	10	30.04	0	0	1	0	0	0	0	0	1	0	0	0	1	0	0	0	0	0
183607	31	0.8	23.23	0	0	0	0	0	0	0	0	1	0	0	0	1	0	0	0	0	0
183875	24	2	20.94	0	0	1	0	0	0	0	0	1	1	0	0	1	0	0	0	0	1
183626	20	1.6	26.22	0	0	1	0	1	0	0	0	1	0	0	0	0	0	0	0	0	0
184217	22	2.4	27.24	0	0	1	0	0	0	0	0	1	0	0	0	1	0	0	0	0	0
187737	23	2.4	27.24	0	0	1	0	0	0	0	0	1	0	0	0	1	0	0	0	0	1
183599	32	5.6	21.72	0	0	1	0	0	0	0	0	1	0	0	0	1	0	0	0	0	0
184232	29	3	24	0	0	1	0	0	0	0	0	1	0	0	0	1	0	0	0	0	1
184237	31	8	19.63	0	0	1	0	0	0	0	0	1	0	0	0	1	0	0	0	0	0
184278	38	6	27.7	0	1	1	0	0	0	0	1	1	1	0	0	0	0	0	0	0	0
188912	38	7	27.7	0	1	1	0	0	0	0	1	1	1	0	0	0	0	0	0	0	0
183650	27	5	32.05	0	0	1	0	0	0	0	0	1	0	0	0	1	0	0	0	0	0
184324	30	8	20.33	0	0	1	0	0	0	0	0	1	0	0	0	0	0	0	0	0	0
183920	30	2	24.03	0	0	1	0	0	0	0	0	1	0	0	0	1	0	0	0	0	1
184380	38	7	25.04	0	0	1	1	0	0	0	0	1	0	0	0	1	0	0	0	0	1
197902	39	1	25.04	0	0	1	1	0	0	0	0	1	0	0	0	1	0	0	0	0	0
184402	31	10	24.24	0	0	1	0	0	0	0	0	0	0	0	1	1	0	0	0	0	0
183202	33	6	29.14	0	0	1	0	0	0	0	0	0	0	1	1	1	0	0	0	0	1
184408	34	14	17.44	0	0	1	0	0	0	0	0	1	0	0	0	1	0	0	0	0	0
188083	34	14	17.44	0	0	1	0	0	0	0	0	1	0	0	0	1	0	0	0	0	1
184410	41	8	23.03	0	0	1	0	0	0	0	0	1	0	0	0	0	0	0	0	0	0
183866	39	10	28.1	0	0	1	0	0	0	0	0	1	0	0	0	1	0	0	0	0	0
184449	31	4	25.07	0	0	1	0	0	0	0	0	1	0	0	0	0	0	0	0	0	1
184461	37	0.3	28.44	0	0	0	0	0	0	0	0	1	0	0	0	1	0	0	0	0	0
183918	33	2.3	23.11	0	0	1	0	0	0	1	0	1	0	0	0	0	0	0	0	0	0
184285	34	2	23.44	0	0	1	0	0	0	0	0	1	0	0	0	1	0	0	0	0	0
184504	28	4	27.77	0	0	1	0	0	0	0	0	1	0	0	0	0	0	0	0	0	0
184523	34	4	19.65	0	0	1	0	0	0	0	0	1	0	0	0	1	0	0	0	0	0
184085	32	10	25.04	0	0	1	0	0	0	0	0	1	0	0	0	1	0	0	0	0	0
183979	30	2.6	19.11	0	0	1	0	1	0	0	0	1	0	0	0	0	0	0	0	0	0
184603	36	8	24.97	0	0	1	0	0	0	0	0	1	0	0	0	0	0	0	0	0	1
184279	24	2	19.14	0	0	1	0	0	0	0	0	1	0	0	0	1	0	0	0	0	0
183737	28	5	23.93	0	0	1	0	0	0	0	0	1	0	0	0	0	0	0	0	0	1
180583	35	4	26.67	0	1	1	0	0	0	0	0	1	0	1	0	1	0	0	0	0	1
184607	33	3	18.49	0	0	1	0	0	0	0	0	1	0	0	0	1	0	0	0	0	1
184172	34	6	17.48	0	0	1	0	1	0	0	0	1	1	0	0	0	0	0	0	0	0
184628	35	4	22.96	0	0	1	0	0	0	0	0	1	0	0	0	1	0	0	0	0	1
184645	32	11	20.03	0	0	1	0	0	0	0	0	1	0	0	0	1	0	0	0	0	0
183750	29	3	30.12	0	1	1	0	0	0	0	0	1	0	0	0	1	0	0	0	0	0
206714	31	1	30.12	0	1	1	0	1	0	0	0	1	0	0	0	0	0	0	0	0	0
184662	32	3	20.93	0	0	1	0	0	0	0	0	1	0	0	0	0	0	0	0	0	0
183953	33	4	23.63	0	0	1	0	0	0	0	0	1	0	0	0	1	0	0	0	0	0
184413	28	2	24.24	0	0	1	0	0	0	0	0	1	0	0	0	1	0	0	0	0	0
187553	28	3	24.24	0	0	1	0	0	0	0	0	1	0	0	0	1	0	0	0	0	0
184214	33	3	22.22	0	1	1	0	0	0	0	0	1	0	0	0	1	0	0	0	0	0
184133	27	4	16.22	0	0	1	0	0	0	0	0	1	0	0	0	1	0	0	0	0	0
189179	23	2	26.57	0	0	1	0	0	0	0	0	1	0	0	0	1	0	0	0	0	0
184759	26	4	27.56	0	0	1	0	0	0	0	0	1	0	1	0	0	0	0	0	0	0
188598	27	4	27.56	0	0	1	0	0	0	0	0	1	0	1	0	0	0	0	0	0	0
184480	38	6	22.21	0	0	1	0	0	0	0	0	1	0	0	0	1	0	0	0	0	0
184787	35	1	24.69	0	0	1	0	0	0	0	0	1	0	0	0	1	0	0	0	0	0
184810	34	3	25.39	0	0	1	0	0	0	0	0	1	0	0	0	1	0	0	0	0	0
184549	32	8	24.3	0	0	1	0	0	0	0	1	0	0	0	0	0	0	0	0	0	0
183904	33	5	25.89	0	0	1	0	0	0	0	1	0	0	0	1	1	0	0	0	0	0
183511	34	7	26.04	0	0	1	0	0	0	0	0	1	0	0	0	1	0	0	0	0	0
181234	34	7	19.23	0	0	1	0	0	0	0	0	1	0	0	0	1	0	0	0	0	0
204524	35	0.5	19.23	0	0	1	0	1	1	0	0	1	0	0	0	1	0	0	0	0	0
184888	27	0.5	23.5	0	0	0	0	0	0	0	0	1	0	0	0	1	0	0	0	0	0
184498	37	10	32.46	0	1	1	1	0	0	0	0	1	0	0	0	0	0	0	0	0	0
184900	31	1	23.66	0	1	1	0	0	0	0	0	1	0	0	0	1	0	0	0	0	1
184299	31	4	27.04	0	0	1	0	0	0	0	0	1	1	1	0	1	0	0	0	0	1
184239	36	3	21.48	0	1	1	0	0	0	0	0	1	1	0	0	1	0	0	0	0	0
184933	30	5	21.72	0	0	1	0	0	0	0	0	1	0	0	0	1	0	0	0	0	0
258393	33	2	21.72	0	0	1	1	1	0	0	1	1	0	0	0	0	0	0	0	0	0
184980	32	6	18.43	0	1	1	0	0	0	0	0	1	0	0	0	0	0	0	0	0	0
185009	28	3	18.73	0	0	1	0	0	0	0	0	1	0	0	0	1	0	0	0	0	0
185020	22	2	22.45	0	0	1	0	0	0	0	0	1	0	0	0	0	0	0	0	0	0
185011	36	12	25.22	0	0	1	0	0	0	0	0	1	0	0	0	1	0	0	0	0	0
183746	26	0.3	19.05	0	1	0	0	0	0	0	0	1	0	0	0	1	0	0	0	0	1
185039	34	9	22.22	1	0	1	0	0	0	0	0	1	0	0	0	0	0	0	0	0	0
185077	33	2	33.33	0	0	1	0	0	0	0	0	1	0	0	0	1	0	0	0	0	0
187107	34	2	33.33	0	0	1	0	0	0	0	0	1	0	0	0	1	0	0	0	0	1
185082	34	8	20	0	0	1	0	1	0	0	0	1	0	0	0	0	0	0	0	0	0
185083	24	4	20.77	0	1	1	0	0	0	0	0	1	0	0	0	1	0	0	0	0	0
185110	33	2.4	20	0	0	1	0	0	0	0	0	1	0	0	0	1	0	0	0	0	1
185112	30	1	20.34	0	1	1	0	0	0	0	0	0	0	0	1	0	0	0	0	0	0
185127	39	2	22.19	0	0	1	1	0	0	0	0	1	0	0	0	1	0	0	0	0	0
184470	32	5	30.47	0	0	1	0	0	0	0	0	1	0	0	0	0	0	0	0	0	1
185149	38	14	21.33	0	0	1	0	0	0	0	0	1	0	0	0	1	0	0	0	0	0
185186	30	3	24.8	0	1	1	0	1	0	0	0	1	1	0	0	0	0	0	0	0	0
196169	31	4	24.8	0	1	1	1	1	0	0	0	1	1	0	0	0	0	0	0	0	0
184824	33	2	22.92	0	0	1	0	0	0	1	0	1	1	0	0	1	0	0	0	0	1
185187	26	6	24.44	0	0	1	0	0	0	0	0	1	0	0	0	1	0	0	0	0	0
184630	36	1.8	21.11	0	0	1	0	0	0	0	0	1	0	0	0	1	0	0	0	0	0
188609	37	2	21.11	0	0	1	0	0	0	0	0	1	0	0	0	1	0	0	0	0	1
185184	23	3	24.97	0	1	1	0	0	0	0	0	1	0	0	0	1	0	0	0	0	0
185215	30	3	20.81	0	0	1	0	0	0	0	0	1	0	0	0	1	0	0	0	0	0
185232	36	4	26.78	0	1	1	0	0	0	0	0	1	0	0	0	1	0	0	0	0	1
184585	35	1	22.15	0	0	1	0	0	0	0	1	1	0	0	0	1	0	0	0	0	1
184655	30	4	22.66	0	0	1	0	0	0	0	0	1	0	0	0	1	0	0	0	0	0
185262	27	3	17.19	0	0	1	0	0	0	0	1	1	0	0	0	1	0	0	0	0	1
185040	27	1.5	23.73	0	0	1	0	0	0	0	0	1	0	0	0	1	0	0	0	0	0
185268	31	4	25.78	0	0	1	0	0	0	0	0	1	0	0	0	1	0	0	0	0	0
184852	34	3	22.83	0	1	1	0	0	0	0	0	1	0	0	0	0	0	0	0	0	0
185340	31	10	22.66	0	0	1	0	0	0	0	0	1	0	0	0	1	0	0	0	0	0
198773	33	1	22.66	0	0	1	0	0	0	0	0	1	0	0	0	1	0	0	0	0	0
184606	30	2	24	0	1	1	0	0	0	0	0	1	0	0	0	1	0	0	0	0	0
185016	28	2	21.44	0	1	1	0	0	0	0	0	1	0	0	0	1	0	0	0	0	0
185193	31	1.7	27.27	0	0	1	0	0	0	0	0	1	0	0	0	1	0	0	0	0	0
185139	36	4	21.4	0	0	1	1	0	0	0	0	1	0	0	0	1	0	0	0	0	0
184897	31	11	24.61	0	1	1	0	0	0	0	0	1	0	0	0	0	0	0	0	0	0
185037	31	14	26.12	0	0	1	0	0	0	0	0	1	1	0	0	1	0	0	0	0	0
185019	29	7	24.61	0	0	1	0	0	0	0	0	1	0	0	0	1	0	0	0	0	0
185511	34	6	23.54	0	0	1	0	0	0	0	1	1	0	0	0	1	0	0	0	0	1
185519	27	5	25.3	0	0	1	0	1	0	0	0	1	0	0	0	0	0	0	0	0	0
182904	40	2	25	0	0	1	0	0	0	0	0	1	0	1	0	0	0	0	0	0	0
190141	41	2	25	0	0	1	0	0	0	0	0	1	0	1	0	0	0	0	0	0	0
184863	29	7	18.51	0	0	1	1	0	0	0	0	1	0	0	0	1	0	0	0	0	0
185536	30	3	23.83	0	0	1	0	0	0	0	0	1	0	0	0	0	0	0	0	0	0
185562	35	12	29.33	1	1	1	0	0	0	0	0	1	0	0	0	1	0	0	0	0	0
184992	28	2.9	21.67	0	0	1	0	0	0	0	0	1	0	0	0	1	0	0	0	0	0
185587	37	10	23.23	0	0	1	0	0	0	0	0	1	0	0	0	1	0	0	0	0	0
184441	36	6	24.22	0	0	1	0	0	0	0	0	1	0	0	0	1	0	0	0	0	0
185601	22	2	18.73	0	0	1	0	0	0	0	1	1	0	0	0	1	0	0	0	0	0
185623	40	1	27.99	0	0	1	0	0	0	0	0	1	0	0	0	1	0	0	0	0	0
185324	29	4	24.84	0	0	1	0	0	0	0	0	1	0	0	0	0	0	0	0	0	0
185388	33	2	25.72	0	0	1	0	0	0	0	0	1	0	0	0	1	0	0	0	0	0
185663	33	2	24.22	0	0	1	0	0	0	0	0	1	1	0	0	0	0	1	0	0	0
185667	38	7	24.89	0	0	1	0	0	0	0	0	1	0	0	0	0	0	0	0	0	0
185580	33	7	21.48	0	1	1	0	0	0	0	1	1	0	0	0	1	0	0	0	0	0
184962	26	5	28.62	0	1	1	0	0	0	0	0	1	0	0	0	1	0	0	0	0	0
185715	32	1	20.55	0	1	1	0	0	0	0	0	1	0	0	0	1	0	0	0	0	1
184883	32	3	27.99	0	0	1	0	0	0	0	0	1	0	0	0	1	0	0	0	0	0
186140	24	3	21.48	0	0	1	0	1	0	0	0	1	0	0	0	0	0	0	0	0	0
184619	35	3	24.03	0	0	1	0	0	0	0	0	1	0	0	0	0	0	0	0	0	0
183763	33	6	22.6	0	0	1	0	0	0	0	0	1	0	0	0	1	0	0	0	0	0
183928	31	5	27.34	0	0	1	0	0	0	0	0	1	0	0	0	1	0	0	0	0	1
185807	37	13	21.72	0	0	1	0	0	0	0	0	1	0	0	0	1	0	0	0	0	1
185368	28	3	19.23	0	1	1	0	0	0	0	0	1	0	0	0	1	0	0	0	0	0
185849	31	3	26.64	0	0	1	0	0	0	0	0	1	0	0	0	1	0	0	0	0	0
185179	28	1	20.61	0	1	1	0	0	0	0	0	0	0	0	1	1	0	0	0	0	0
185867	35	2	17.58	0	0	1	0	0	0	0	0	1	0	0	0	1	0	0	0	0	0
185321	35	9	26.37	0	1	1	0	0	0	0	0	1	1	0	0	1	0	0	0	0	0
185243	30	3	20.69	0	0	1	0	0	0	0	0	1	0	0	0	1	0	0	0	0	0
185760	29	4	25.39	0	0	1	1	0	0	0	0	1	0	0	0	1	0	0	0	0	0
185185	35	3	19.53	0	0	1	0	0	0	0	0	1	0	0	0	0	0	0	0	0	1
185987	30	4	22.96	0	0	1	0	0	0	0	0	1	0	0	0	1	0	0	0	0	0
185657	27	4	21.23	0	0	1	0	0	0	0	0	1	0	0	0	1	0	0	0	0	0
181921	33	2	24.65	0	0	1	0	0	0	0	0	1	0	0	0	1	0	0	0	0	1
185675	35	7	23.83	0	0	1	1	0	0	0	0	1	0	0	0	1	0	0	0	0	0
185501	39	5	17.36	0	0	1	0	0	0	0	0	1	0	0	0	1	0	0	0	0	0
186047	37	0.5	24.03	0	0	0	0	0	0	0	0	1	0	0	0	1	0	0	0	0	1
185442	30	1.8	21.64	0	0	1	0	0	0	0	0	1	0	0	0	1	0	0	0	0	0
186083	30	7	20.57	0	0	1	0	0	0	0	0	1	0	0	0	1	0	0	0	0	0
186102	39	7	27.89	0	0	1	0	0	0	0	0	1	0	0	0	1	0	0	0	0	1
185034	30	1	19.62	0	0	1	0	0	0	0	0	1	0	1	0	1	0	0	0	0	0
185443	33	3	24.97	0	0	1	0	0	0	0	1	1	0	0	0	1	0	0	0	0	0
185646	39	8	22.06	0	0	1	0	0	0	0	0	1	0	0	0	1	0	0	0	0	0
186152	34	8	26.67	0	0	1	0	0	0	0	0	1	0	0	0	1	0	0	0	0	0
185784	33	12	24.77	0	0	1	0	0	0	0	0	1	0	0	0	1	0	0	0	0	1
185791	34	2	28.76	0	0	1	0	0	0	0	0	1	0	0	0	1	0	0	0	0	0
186159	33	6	23.05	0	0	1	0	0	0	0	0	1	0	0	0	1	0	0	0	0	0
184912	27	1	24.03	0	0	1	0	0	0	0	0	1	0	0	0	1	0	0	0	0	0
185620	34	1	22.19	0	0	1	0	0	0	0	0	1	0	0	0	1	0	0	0	0	0
185542	28	2.5	26.64	0	0	1	0	0	0	0	0	1	0	0	0	1	0	0	0	0	0
185806	41	6	27.69	0	0	1	1	1	0	0	0	1	0	1	0	0	0	0	0	0	0
186205	31	5	27.06	0	0	1	0	0	0	0	0	1	0	1	0	1	0	0	0	0	1
185609	29	4	22.66	0	0	1	0	0	0	0	0	1	0	0	0	1	0	0	0	0	0
185599	39	3	25.76	0	0	1	0	0	0	0	0	1	0	0	0	1	0	0	0	0	0
188621	40	3	25.76	0	0	1	0	0	0	0	0	1	0	0	0	1	0	0	0	0	0
186161	27	1	30.84	0	0	1	0	1	0	0	0	1	0	0	0	1	0	0	0	0	0
185927	32	2	21.16	0	0	1	0	0	0	0	0	1	0	0	0	1	0	0	0	0	1
185918	31	1	22.52	0	0	1	0	0	0	0	0	1	0	0	0	1	0	0	0	0	1
185993	33	1	18.43	0	0	1	0	0	0	0	0	1	0	0	0	1	0	0	0	0	0
187968	33	2	18.43	0	0	1	0	0	0	0	0	1	0	0	0	1	0	0	0	0	0
215567	35	1.5	18.43	0	0	1	0	1	0	0	0	1	0	0	0	0	0	0	0	0	0
186004	26	4	26.67	0	1	1	0	0	0	0	0	1	0	0	0	0	0	0	0	0	0
185424	33	1	23.01	0	0	1	0	0	0	0	0	1	0	0	0	1	0	0	0	0	0
185926	24	1	18.13	0	1	1	0	0	0	0	0	0	0	0	1	1	0	0	0	0	0
186332	31	6	24.03	0	0	1	0	0	0	0	1	1	0	0	0	1	0	0	0	0	0
186376	34	7	23.31	0	0	1	0	0	0	0	0	1	0	0	0	1	0	0	0	0	0
186388	37	4	24.03	0	0	1	1	0	0	0	0	1	0	0	0	1	0	0	0	0	0
186390	29	2	22.04	0	0	1	0	0	0	0	0	1	0	0	0	1	0	0	0	0	0
197931	30	2	22.04	0	0	1	0	0	0	0	0	1	0	0	0	1	0	0	0	0	0
186082	31	5	25.39	0	0	1	0	0	0	0	1	1	0	1	0	1	0	0	0	0	0
186454	28	0.3	19.53	0	0	0	0	0	0	0	0	1	0	0	0	1	0	0	0	0	0
185995	31	2	26.71	0	0	1	0	0	0	0	0	1	0	0	0	1	0	0	0	0	0
186182	40	15	23.97	1	0	1	0	0	0	0	0	1	0	0	0	0	0	0	0	0	1
191430	40	15	23.97	1	0	1	0	0	0	0	0	1	0	0	0	0	0	0	0	0	1
186219	26	7	24.84	0	0	1	0	0	0	0	0	1	0	0	0	1	0	0	0	0	0
186496	33	4	22.03	0	0	1	0	0	0	0	0	1	0	0	0	0	0	0	0	0	0
186520	31	3	21.3	0	0	1	1	0	0	0	0	1	0	0	0	1	0	0	0	0	0
186516	29	4	25.97	0	0	1	0	0	0	0	0	1	0	0	0	1	0	0	0	0	0
185952	32	3	29.04	0	0	1	0	1	0	0	0	1	0	0	0	0	0	0	0	0	0
186677	26	5	21.03	0	0	1	0	0	0	0	0	1	0	0	0	0	0	0	0	0	1
186104	38	3	23.5	0	0	1	0	1	0	0	0	1	0	1	0	1	0	0	0	0	0
186693	29	4	20.08	0	1	1	0	0	0	0	0	1	0	0	0	0	0	0	0	0	1
186695	27	2	19.53	0	0	1	0	0	0	0	0	1	0	0	0	1	0	0	0	0	0
186043	28	2	29.05	0	0	1	0	0	0	0	0	1	0	0	0	1	0	0	0	0	0
186465	31	1	19.81	0	0	1	0	1	0	0	0	1	0	0	0	1	0	0	0	0	0
186712	26	5	23.83	0	1	1	0	0	0	0	0	1	0	0	0	1	0	0	0	0	1
186269	22	2	19.72	0	1	1	0	0	0	0	1	1	0	0	0	1	0	0	0	0	0
186119	26	5	20.89	0	0	1	0	0	0	0	0	1	0	0	0	1	0	0	0	0	0
186745	39	1.8	22.52	0	0	1	0	0	0	0	0	1	0	0	0	1	0	0	0	0	0
186807	35	3	21.48	0	0	1	0	0	0	0	0	1	0	0	0	1	0	0	0	0	0
186809	33	7	24.65	0	0	1	0	0	0	0	0	1	0	0	0	1	0	0	0	0	0
186839	25	8	25.78	0	0	1	0	0	0	0	0	1	0	0	0	1	0	0	0	0	0
181711	28	2	23.63	0	0	1	0	0	0	0	0	1	0	0	0	1	0	0	0	0	0
186750	28	3	27.24	0	1	1	0	0	0	0	0	1	0	0	0	0	0	0	0	0	0
186879	30	1	22.03	0	0	1	0	0	0	0	0	1	0	0	0	1	0	0	0	0	0
197277	31	2	22.03	0	0	1	0	0	0	0	0	1	0	0	0	1	0	0	0	0	1
186843	31	4	22.89	0	0	1	0	0	0	0	0	1	0	0	0	1	0	0	0	0	0
185962	41	6	21.48	0	0	1	0	0	0	0	0	0	0	1	1	1	0	0	0	0	0
197188	41	7	21.48	0	0	1	0	0	0	0	0	0	0	1	1	1	0	0	0	0	0
186927	31	4	25.68	0	0	1	0	0	0	0	0	1	0	0	0	1	0	0	0	0	0
186684	37	5	18.49	0	0	1	0	0	0	0	1	1	0	0	0	0	0	0	0	0	0
186765	28	7	22.94	0	1	1	0	0	0	0	0	1	0	0	0	1	0	0	0	0	0
187003	25	3	20.5	0	0	1	0	1	0	0	0	1	0	0	0	1	0	0	0	0	0
182442	27	4	22.31	0	0	1	0	0	0	0	0	1	0	0	0	0	0	0	0	0	1
219772	29	2	22.31	0	0	1	0	0	0	0	0	1	0	0	0	0	0	0	0	0	0
186380	30	4	23.15	0	1	1	0	0	0	0	0	1	0	0	0	1	0	0	0	0	1
186078	27	3	25.67	0	0	1	0	0	0	0	0	1	0	1	0	1	0	0	0	0	1
186322	32	3	20.83	0	0	1	0	0	0	0	0	1	0	0	0	1	0	0	0	0	1
187105	36	1	22.31	0	0	1	0	0	0	0	0	1	0	0	0	0	0	0	0	0	0
187134	39	3	26.95	0	0	1	0	0	0	0	0	1	0	1	0	1	0	0	0	0	0
186542	29	2	26.67	0	0	1	0	1	0	0	0	1	0	0	0	0	0	0	0	0	0
187226	32	7	18.9	0	0	1	0	1	0	0	0	1	0	0	0	1	0	0	0	0	1
186803	26	8	29.64	0	0	1	0	0	0	0	0	1	0	0	0	1	0	0	0	0	0
186869	32	5	18.37	0	1	1	0	1	0	0	0	1	0	1	0	1	0	0	0	0	0
186170	29	5	23.5	0	0	1	1	1	0	1	0	1	0	0	0	1	0	0	0	0	0
272813	32	8	23.5	0	0	1	1	1	0	1	0	1	0	0	0	0	0	0	0	0	0
186661	35	7	23.92	0	0	1	0	0	0	0	0	1	0	0	0	1	0	0	0	0	0
190384	36	8	23.92	0	0	1	0	0	0	0	0	1	0	0	0	1	0	0	0	0	0
187340	27	4	25.39	0	0	1	0	0	0	0	1	1	0	0	0	1	0	0	0	0	1
186749	22	4	17.31	0	0	1	0	0	0	0	0	1	0	0	0	0	0	0	0	0	0
191454	22	5	17.31	0	0	1	0	0	0	0	0	1	0	0	0	0	0	0	0	0	0
195762	27	5	18.8	0	0	1	0	0	0	0	0	1	0	0	0	1	0	0	0	0	0
186681	35	2	24.03	0	0	1	0	0	0	0	0	1	0	0	0	1	0	0	0	0	0
187397	37	5	22.94	0	0	1	1	0	0	0	0	1	0	0	0	1	0	0	0	0	1
186711	33	6	27.06	0	0	1	0	0	0	0	0	1	0	0	0	1	0	0	0	0	0
187498	30	1.6	16.87	0	0	1	1	0	0	0	0	1	0	0	0	1	0	0	0	0	0
185470	32	11	26.37	0	0	1	0	0	0	0	0	1	0	0	0	1	0	0	0	0	0
184412	24	3	23.11	0	0	1	0	1	0	0	0	1	0	0	0	1	0	0	0	0	0
187503	31	3.2	23.33	0	0	1	0	0	0	0	0	1	0	0	0	1	0	0	0	0	0
187327	25	0.7	20.4	0	0	0	0	1	0	0	0	1	0	0	0	1	0	0	0	0	0
187646	27	3	23.6	0	0	1	0	0	0	0	1	1	0	0	0	1	0	0	0	0	0
187599	36	10	21.78	0	0	1	0	0	0	0	0	1	0	0	0	1	0	0	0	0	0
187715	26	2	20.39	0	0	1	0	1	0	0	0	1	0	0	0	1	0	0	0	0	1
196476	26	3	20.39	0	0	1	0	1	0	0	0	1	0	0	0	1	0	0	0	0	0
187526	27	2	31.25	0	0	1	0	0	0	0	0	1	0	0	0	1	0	0	0	0	0
187645	30	6	20.2	0	0	1	0	0	0	0	0	1	0	0	0	1	0	0	0	0	0
187719	28	7	18.55	0	1	1	0	1	0	0	0	1	0	0	0	1	0	0	0	0	0
187395	25	3	27.56	0	1	1	0	1	0	0	0	1	0	0	0	0	0	0	0	0	0
187235	29	7	25.39	0	0	1	0	1	0	0	0	1	0	0	0	0	0	0	0	0	0
186913	36	11	25.56	0	0	1	0	1	0	0	0	1	0	1	0	0	0	0	0	0	1
187762	35	6	20.45	0	1	1	0	0	0	0	1	1	0	0	0	1	0	0	0	0	0
186945	32	2	26.16	0	1	1	0	1	0	0	0	1	0	0	0	1	0	0	0	0	0
187585	30	4	18.92	0	0	1	1	0	0	0	1	1	0	0	0	1	0	0	0	0	0
187136	33	5	25.27	0	0	1	0	0	0	0	0	1	0	0	0	1	0	0	0	0	0
216763	35	16	25.27	0	1	1	0	1	0	0	0	1	0	0	0	0	0	1	0	0	1
187497	41	12.5	24.44	0	0	1	0	0	0	0	0	1	0	1	0	0	0	0	0	0	0
189535	35	3	31.25	0	0	1	0	0	0	0	0	1	0	0	0	1	0	0	0	0	0
187923	29	3	22.87	0	0	1	0	1	0	0	0	1	0	0	0	1	0	0	0	0	0
187933	31	0.7	21.78	0	1	0	0	1	0	0	0	1	0	0	0	0	0	0	0	0	0
187510	29	0.5	28.89	0	0	0	0	1	0	0	0	1	0	0	0	1	0	0	0	0	0
187962	38	4	24.46	0	0	1	0	1	0	0	0	1	1	0	0	1	0	0	0	0	1
187303	26	0.8	19.98	0	0	1	0	1	0	0	0	1	0	0	0	1	0	0	0	0	0
186904	33	14	33.73	0	0	1	0	1	0	0	0	1	0	0	0	1	0	0	0	1	0
187975	36	4	20.31	0	0	1	0	1	0	0	0	1	0	0	0	0	0	0	0	0	0
187446	36	9	29.64	0	0	1	0	1	0	0	0	1	0	0	0	0	0	0	0	0	0
187662	22	2	20.93	0	0	1	0	0	0	0	0	1	0	0	0	0	0	0	0	0	1
188030	32	2	22.03	0	0	1	0	1	0	0	0	1	0	0	0	0	0	0	0	0	1
191063	39	4	24.34	0	0	1	0	1	0	0	0	1	0	0	0	0	0	0	0	0	0
189955	40	6	26.37	0	0	1	0	0	0	0	0	1	0	0	0	1	0	0	0	0	0
188078	22	1.6	18.55	0	0	1	0	0	0	0	0	1	0	0	0	1	0	0	0	0	0
189223	34	3	22.03	0	1	1	0	1	0	0	0	1	0	0	0	1	0	0	0	0	0
187843	36	4	25.63	0	0	1	1	1	0	0	0	1	0	0	0	1	0	0	0	0	0
188183	33	7	24.97	0	0	1	0	1	0	0	0	1	0	0	0	1	0	0	0	0	1
188193	24	9	22.89	0	0	1	0	0	0	0	0	1	0	0	0	1	0	0	0	0	0
187539	34	2	26.17	0	0	1	1	0	0	0	1	1	0	0	0	1	0	0	0	0	0
191066	34	3	26.17	0	0	1	1	0	0	0	1	1	0	0	0	1	0	0	0	0	1
188192	24	1.3	24.44	0	0	1	0	0	0	0	0	1	0	0	0	0	0	0	0	0	0
188216	37	1	21.64	0	1	1	0	1	0	0	0	1	0	0	0	1	0	0	0	0	0
187151	32	3	24.39	0	0	1	0	0	0	0	0	1	0	0	0	1	0	0	1	0	0
188273	28	4	22.41	0	0	1	0	0	0	0	0	1	0	0	0	1	0	0	0	0	1
188280	37	6	24.56	0	0	1	0	1	0	0	0	1	1	0	0	0	0	0	0	0	0
189646	37	6	24.56	0	0	1	0	1	0	0	0	1	1	0	0	0	0	0	0	0	0
188272	25	3	23.31	0	0	1	0	1	0	0	0	1	0	0	0	1	0	0	0	0	1
187980	27	6	25.56	0	0	1	0	0	0	0	0	1	0	0	0	1	0	0	0	0	1
188325	32	3.6	20.7	0	0	1	0	0	0	0	0	1	0	0	0	1	0	0	0	0	0
188319	28	3	21.11	0	1	1	0	0	0	0	0	1	0	0	0	1	0	0	0	0	0
188355	28	3	24.97	0	0	1	0	0	0	0	0	1	0	0	0	1	0	0	0	0	0
194234	29	3	24.97	0	0	1	0	0	0	0	0	1	0	0	0	1	0	0	0	0	0
187934	30	4	23.63	0	0	1	0	1	0	0	0	1	0	0	0	1	0	0	0	0	0
189390	31	4	24.65	0	0	1	0	0	0	0	0	1	0	0	0	1	0	0	0	0	0
187118	31	2	26.35	0	1	1	0	0	0	0	0	1	0	0	0	0	0	0	0	0	0
188468	37	8	27.85	0	0	1	0	1	0	0	0	1	0	0	0	1	0	0	0	0	0
187844	36	6	20.58	0	0	1	0	1	0	0	0	1	0	0	0	1	0	0	0	0	1
187410	32	6	18.9	0	0	1	1	0	0	0	0	1	0	0	0	0	0	0	0	0	0
188438	40	16.3	25.34	1	0	1	0	0	0	0	0	1	0	0	0	1	0	0	0	1	1
191124	35	7	22.89	0	0	1	0	1	0	0	0	1	0	0	0	1	0	0	0	0	0
188081	24	2	26.37	0	0	1	0	0	0	0	0	1	0	0	0	0	0	0	0	0	0
188424	31	3.5	23.73	0	0	1	0	0	0	0	0	1	0	0	0	1	0	0	0	0	1
187859	34	2	30.43	0	0	1	0	1	0	0	0	1	0	0	0	1	0	0	0	0	0
188523	35	3	28.1	0	0	1	0	0	0	0	0	1	0	0	0	1	0	0	0	0	0
191173	35	4	28.1	0	0	1	0	0	0	0	0	1	0	0	0	1	0	0	0	0	0
196964	36	4	28.1	0	0	1	0	0	0	0	0	1	0	0	0	1	0	0	0	0	0
188548	22	4	18.97	0	1	1	0	1	0	0	0	1	0	0	0	0	0	0	0	0	1
186168	34	7	26.56	0	0	1	1	0	0	0	0	1	0	0	0	1	0	0	0	0	1
187789	29	4	25.28	0	0	1	0	1	0	0	0	1	0	0	0	1	0	0	0	0	0
188578	28	2	32.47	0	0	1	0	0	0	0	1	1	0	0	0	1	0	0	0	0	1
188290	27	7	28.91	0	1	1	0	0	0	0	0	1	0	0	0	0	0	0	0	0	0
188619	34	3	20.2	0	0	1	0	1	0	0	0	1	0	0	0	0	0	0	0	0	0
187663	29	5	21.38	0	0	1	0	1	0	0	0	1	0	0	0	1	0	0	0	0	0
188656	32	4	33.81	0	0	1	0	1	0	0	0	1	0	0	0	0	0	0	0	0	0
188680	25	1.5	19.98	0	0	1	0	1	0	0	0	1	0	0	0	1	0	0	0	0	0
188696	36	3	23.12	0	0	1	0	0	0	0	0	1	0	0	0	1	0	0	0	0	0
188440	28	1	27.94	0	0	1	0	0	0	0	0	1	0	0	0	1	0	0	0	0	0
186901	38	19	24.14	0	0	1	0	0	0	0	0	1	0	0	0	1	0	0	0	0	0
187935	26	1	22.86	0	0	1	1	1	0	0	0	1	0	0	0	1	0	0	0	0	0
198723	27	2	22.86	0	0	1	1	1	0	0	0	1	0	0	0	1	0	0	0	0	0
188049	31	3	24.78	0	0	1	0	0	0	0	0	1	0	0	0	1	0	0	0	0	0
188593	30	8	20.03	0	0	1	0	0	0	0	0	1	0	0	0	1	0	0	0	0	0
183739	34	1	24.35	0	0	1	0	0	0	0	0	1	0	0	0	1	0	0	0	0	0
188412	32	4	22.6	0	0	1	0	1	0	0	0	1	0	0	0	0	0	0	0	0	0
188794	29	4	30.83	0	1	1	1	1	0	0	0	1	0	0	0	1	0	0	0	0	0
188602	30	9	20.19	0	0	1	0	0	0	0	0	1	0	0	0	1	0	0	0	0	0
188819	31	5	19.48	0	0	1	0	1	0	0	0	1	0	0	0	1	0	0	0	0	0
188821	32	6	26.31	0	0	1	0	0	0	0	0	1	0	0	0	1	0	0	0	0	0
188845	29	6	21.27	0	0	1	0	1	0	0	0	1	0	0	0	1	0	0	0	0	0
186123	25	3	24.44	0	0	1	0	0	0	0	0	1	0	0	0	1	0	0	0	0	0
188905	25	2	20	0	0	1	0	1	0	0	0	1	0	0	0	1	0	0	0	0	0
188519	34	4	23.11	0	0	1	0	1	0	0	0	1	1	0	0	1	0	0	0	0	0
188587	28	2	29.01	0	0	1	0	0	0	0	0	1	0	0	0	1	0	0	0	0	0
188518	31	0.4	23.73	0	0	0	0	0	0	0	0	1	0	0	0	1	0	0	0	0	0
188254	33	3	31.25	0	0	1	1	1	0	0	0	1	0	0	0	0	0	0	0	0	0
189014	33	2	29.69	0	0	1	0	1	0	0	0	1	0	0	0	0	0	0	0	0	0
189047	31	13	21	0	0	1	0	0	0	0	0	1	0	0	0	1	0	0	0	0	0
188743	40	5	24.31	0	0	1	0	0	0	0	0	1	0	0	0	1	0	0	0	0	0
193205	40	5	24.31	0	0	1	0	0	0	0	0	1	0	0	0	1	0	0	0	0	0
187864	36	4	20.43	0	0	1	0	1	0	0	1	1	0	1	0	0	0	0	0	0	0
194601	37	4	20.43	0	0	1	0	1	0	0	1	1	0	1	0	0	0	0	0	0	0
189118	21	6	14.42	0	0	1	1	1	0	0	0	1	0	0	0	1	0	0	0	0	0
187961	32	4	27.59	0	0	1	0	1	0	0	0	1	0	0	0	1	0	0	0	0	0
189084	31	5	23.05	0	0	1	0	0	0	0	0	1	0	0	0	1	0	0	0	0	1
188865	27	4	20.03	0	1	1	0	1	0	0	0	1	0	0	0	1	0	0	0	0	0
188214	33	3	32.46	0	0	1	1	0	0	0	0	1	0	1	0	1	0	0	0	0	1
188969	34	1	32.87	0	0	1	0	0	0	0	0	1	0	0	0	1	0	0	0	0	0
188753	28	7	23.15	0	0	1	1	0	0	0	0	1	0	0	0	1	0	0	0	0	0
189098	33	2	22.66	0	0	1	0	1	0	0	0	1	0	0	0	1	0	0	0	0	0
191078	33	2	22.66	0	0	1	0	1	0	0	0	1	0	0	0	1	0	0	0	0	0
189171	38	11	23.23	1	0	1	1	1	0	0	0	0	0	0	1	1	0	0	0	0	0
189282	25	5	17.44	0	0	1	0	0	0	0	0	1	0	0	0	0	0	0	0	0	1
189294	37	7	23.71	0	0	1	0	0	0	0	0	1	0	1	0	1	0	0	0	0	0
189297	34	3	25.84	0	0	1	0	0	0	0	0	1	0	1	0	1	0	0	0	0	0
189299	33	6	18.03	0	1	1	0	0	0	0	0	1	0	0	0	1	0	0	0	0	0
202467	34	4	18.03	0	1	1	1	0	0	0	0	1	0	0	0	1	0	0	0	0	0
188723	27	6	19.23	0	0	1	0	0	0	0	0	1	0	0	0	1	0	0	0	0	0
188277	31	2	19.43	0	1	1	0	1	0	0	0	1	0	0	0	0	0	0	0	0	0
189066	36	4	30.66	0	1	1	0	0	0	0	0	1	0	0	0	1	0	0	0	0	1
199762	37	4	30.66	0	1	1	0	0	0	0	0	1	0	0	0	1	0	0	0	0	0
189342	39	10	24.61	0	0	1	1	0	0	0	0	1	0	0	0	1	0	0	0	0	0
189347	29	5	24.03	0	1	1	0	0	0	0	0	1	0	0	0	1	0	0	0	0	0
189368	30	0.9	26.04	0	0	1	1	0	0	0	1	1	0	0	0	1	0	0	0	0	0
192774	31	1	26.04	0	0	1	1	0	0	0	1	1	0	0	0	1	0	0	0	0	1
188863	29	4	25.33	0	0	1	0	0	0	0	0	1	0	1	0	1	0	0	0	0	0
194252	30	5	25.33	0	0	1	0	0	0	0	0	1	0	1	0	1	0	0	0	0	0
186448	32	4	20.5	0	0	1	0	0	0	0	0	1	0	0	0	1	0	0	0	0	0
189419	33	5	23.01	0	0	1	0	0	0	0	0	1	0	1	0	1	0	0	0	0	0
188752	28	5	23.11	0	0	1	0	0	0	0	0	1	0	0	0	1	0	0	0	0	0
189418	26	8	22.89	0	1	1	0	0	0	0	1	1	0	0	0	1	0	0	0	0	0
188218	38	6	27.34	0	0	1	0	0	0	0	0	1	0	0	0	1	0	0	0	0	0
189510	28	3.5	21.4	0	0	1	0	0	0	0	0	1	0	0	0	0	0	0	0	0	0
188877	30	8	22.58	0	0	1	0	1	0	0	0	1	0	0	0	1	0	0	0	0	0
189221	33	7	29.15	0	0	1	0	0	0	0	1	1	0	0	0	1	0	0	0	0	1
189407	36	13	26.48	0	0	1	0	0	0	0	0	1	0	0	0	1	0	0	0	1	0
189051	35	3	24.58	0	0	1	0	0	0	0	0	1	0	1	0	1	0	0	0	0	0
189265	26	11	33.33	0	0	1	0	1	0	0	0	1	0	0	0	1	0	0	0	0	0
189586	37	1	25.22	0	1	1	0	0	0	0	0	1	0	0	0	1	0	0	0	0	0
187875	28	3	22.04	0	0	1	0	1	0	0	0	1	0	0	0	1	0	0	0	0	1
189195	26	1.5	18.73	0	1	1	0	1	0	0	0	1	0	0	0	1	0	0	0	0	0
189677	37	18	23.23	0	0	1	0	0	0	0	0	1	0	0	0	1	0	0	0	0	0
189689	39	5	23.44	0	0	1	0	1	0	0	0	1	0	1	0	0	0	0	0	0	0
189117	31	5	20.03	0	0	1	0	1	0	0	0	1	0	0	0	1	0	0	0	0	0
188957	38	4	20.51	0	0	1	0	0	0	0	0	1	0	1	0	1	0	0	0	0	0
189458	35	3	28.41	0	0	1	0	0	0	0	0	1	0	0	0	1	0	0	0	0	0
189651	27	5	20.17	0	0	1	0	0	0	0	0	1	0	0	0	0	0	0	0	0	0
188974	33	7	21.78	0	0	1	0	0	0	0	0	1	0	0	0	0	0	0	0	0	1
189744	36	4	23.44	0	0	1	0	0	0	0	0	1	0	0	0	1	0	0	0	0	1
242927	39	1.5	23.44	0	0	1	0	1	0	0	0	1	0	0	0	0	0	0	0	0	0
188933	32	1	23.44	0	0	1	0	0	0	0	0	1	0	0	0	1	0	0	0	0	0
189274	28	4	22.6	0	0	1	0	0	0	0	0	1	0	0	0	1	0	0	0	0	0
189793	29	3	20.96	0	0	1	0	0	0	0	1	1	0	0	0	1	0	0	0	0	0
189151	37	4	27.34	0	0	1	0	0	0	0	0	1	0	0	0	1	0	0	0	0	0
192476	38	4	27.34	0	0	1	0	0	0	0	0	1	0	0	0	1	0	0	0	0	0
188695	32	3.5	18.73	0	0	1	0	0	0	0	0	1	0	0	0	1	0	0	0	0	1
211331	34	1.7	18.73	0	0	1	0	1	0	0	0	1	0	0	0	0	0	0	0	0	0
189892	32	8	23.6	0	0	1	0	0	0	0	0	1	0	0	0	1	0	0	0	0	0
189191	31	7	29.9	0	0	1	0	0	0	0	0	1	0	0	0	1	0	0	0	0	0
193666	32	7	29.9	0	0	1	0	0	0	0	0	1	1	0	0	1	0	0	0	0	0
189918	34	1.5	22.03	0	1	1	1	0	0	0	1	1	0	0	0	1	0	0	0	0	1
188903	30	6	18.66	0	0	1	0	1	0	0	0	1	0	0	0	0	0	0	0	0	0
189959	22	2	16.19	0	1	1	0	1	0	0	0	1	0	0	0	0	0	0	0	0	1
189620	30	1	23.23	0	0	1	0	0	0	0	0	1	1	0	0	1	0	0	0	0	0
189965	24	5	18	0	0	1	0	0	0	0	0	1	0	0	0	0	0	0	0	0	0
189790	24	7	26.37	0	1	1	0	0	0	0	0	1	0	0	0	1	0	0	0	0	0
190030	33	2.6	25.71	0	0	1	0	1	0	0	0	1	0	0	0	1	0	0	0	0	1
190035	30	8	24.13	0	1	1	0	0	0	0	0	1	0	0	0	1	0	0	0	0	0
188404	33	3	21.45	0	0	1	0	0	0	0	0	1	0	1	0	1	0	0	0	0	0
190069	31	5	23.05	0	0	1	0	0	0	0	0	1	0	0	0	1	0	0	0	0	0
190140	33	6	20.58	0	0	1	0	0	0	0	0	1	0	0	0	1	0	0	0	0	0
190219	30	5	27.22	0	0	1	0	1	0	0	0	1	0	0	0	0	0	0	0	0	0
189392	33	9	25.71	0	1	1	0	0	0	0	0	1	0	0	0	1	0	0	0	0	0
189401	26	3	18.59	0	0	1	0	1	0	0	0	1	0	0	0	1	0	0	0	0	0
189467	31	7	18.9	0	1	1	0	1	0	0	0	1	0	0	0	1	0	0	0	0	0
189581	32	4	21.36	0	0	1	0	1	0	0	0	1	0	0	0	1	0	0	0	0	0
189899	34	1.3	19.22	0	0	1	0	1	0	0	0	1	0	0	0	1	0	0	0	0	0
189672	21	4	26.71	0	0	1	0	1	0	0	0	1	0	0	0	0	0	0	0	0	0
189252	33	4	25.48	0	0	1	0	0	0	0	0	1	0	0	0	0	0	0	0	0	0
185787	29	5	23.43	0	0	1	0	0	0	0	0	1	0	0	0	0	0	0	0	0	1
200093	30	7	23.43	0	0	1	0	0	0	0	0	1	0	0	0	0	0	0	0	0	0
188642	40	12	29.01	0	1	1	0	1	0	0	0	1	0	0	0	1	0	0	0	0	0
190407	37	8	25.78	0	0	1	1	0	0	0	0	1	0	0	0	0	0	0	0	0	0
207368	38	9	25.78	0	0	1	1	0	0	0	0	1	0	0	0	0	0	0	0	0	0
189980	37	8.7	23.83	0	0	1	0	0	0	0	0	1	0	1	0	1	0	0	0	0	1
190463	24	2	23.15	0	0	1	0	0	0	0	0	1	0	0	0	1	0	0	0	0	0
189676	28	5	24.34	0	1	1	0	0	0	0	1	1	0	0	0	1	0	0	0	0	0
189799	33	5	22.06	0	0	1	0	0	0	0	0	1	0	0	0	1	0	0	0	0	0
190502	28	1.5	22.22	0	0	1	0	0	0	0	0	1	0	0	0	1	0	0	0	0	0
190513	29	10	20.83	0	0	1	0	0	0	0	0	1	0	0	0	1	0	0	0	0	0
190487	31	6	26.08	0	1	1	0	0	0	0	0	1	0	0	0	1	0	0	0	0	0
190583	27	3	26.04	0	0	1	0	0	0	0	0	1	0	0	0	1	0	0	0	0	1
190586	25	2	26.67	0	0	1	0	0	0	0	0	1	0	0	0	1	0	0	0	0	0
190330	35	1	19.23	0	0	1	0	0	0	0	0	1	0	0	0	1	0	0	0	0	0
189618	32	1.5	17.44	0	0	1	0	1	0	0	0	1	0	0	0	1	0	0	0	0	0
190156	34	2	25.1	0	0	1	0	1	0	0	0	1	0	0	0	0	0	0	0	0	0
190267	23	3	21.78	0	0	1	0	0	0	0	0	1	0	0	0	0	0	0	0	0	0
190639	39	3	24.84	0	0	1	0	0	0	0	0	1	0	0	0	1	0	0	0	0	0
190642	35	2.6	18.36	0	0	1	0	1	0	0	0	1	0	0	0	0	0	0	0	0	0
190651	25	5	19.14	0	0	1	0	0	0	0	0	1	0	0	0	1	0	0	0	0	0
189943	29	8	16.86	0	0	1	0	0	0	0	1	1	0	0	0	1	0	0	0	0	0
190668	29	9	26.64	0	0	1	0	0	0	0	0	1	0	0	0	1	0	0	0	0	0
190071	31	4	28.1	0	0	1	1	0	0	0	0	1	0	0	0	1	0	0	0	0	0
189639	32	12	20.81	0	0	1	0	1	0	0	0	0	0	0	1	1	0	0	0	0	1
189813	29	6	19.05	0	0	1	0	0	0	0	1	1	0	1	0	1	0	0	0	0	0
190726	29	5	21.97	0	0	1	0	0	0	0	0	1	0	0	0	1	0	0	0	0	0
204644	29	5	21.97	0	0	1	0	0	0	0	0	1	0	0	0	1	0	0	0	0	0
190451	33	4	19.15	0	0	1	0	0	0	0	0	1	0	1	0	1	0	0	0	0	0
190818	33	10	23.71	0	0	1	0	0	0	0	0	1	0	0	0	1	0	0	0	0	1
190239	32	5	21.76	0	0	1	0	0	0	0	0	1	0	0	0	1	0	0	1	0	0
189897	33	1	23.31	0	0	1	0	0	0	0	1	1	1	0	0	0	0	0	0	0	0
189952	42	20	24.25	0	0	1	0	0	0	0	0	1	0	0	0	1	0	0	0	1	1
190068	23	4	20.9	0	0	1	0	0	0	0	0	1	0	0	0	0	0	0	0	0	0
189901	26	4	21.34	0	0	1	1	0	0	0	0	1	0	0	0	1	0	0	0	0	0
190160	41	3	22.21	0	0	1	0	0	0	0	0	0	0	0	1	1	0	0	0	0	0
190976	36	1	26.67	0	0	1	0	0	0	0	0	1	0	1	0	1	0	0	0	0	0
190720	31	8	27.06	0	0	1	0	0	0	0	0	1	0	0	0	0	0	0	0	0	0
190537	26	1	17.75	0	1	1	0	0	0	0	0	1	0	0	0	1	0	0	0	0	0
190584	29	3	20.7	0	0	1	0	0	0	0	0	1	0	0	0	1	0	0	0	0	1
191022	33	4	21.48	0	0	1	0	0	0	0	0	1	1	0	0	1	0	0	0	0	0
191018	29	9	23.15	0	0	1	1	0	0	0	0	1	0	0	0	1	0	0	0	0	0
191023	39	3	28.4	0	0	1	1	0	0	0	0	1	0	1	0	1	0	0	0	0	1
190813	30	3	24.03	0	1	1	0	0	0	0	0	1	0	0	0	0	0	0	0	0	0
191051	26	6	17.4	0	1	1	0	1	0	0	0	1	0	0	0	1	0	0	0	0	0
191043	26	0.2	20.45	0	0	1	0	1	0	0	0	1	0	0	0	1	0	0	0	0	0
190689	35	1	24.72	0	0	1	0	0	0	0	0	1	0	1	0	1	0	0	0	0	0
191047	31	3	24.56	0	0	1	0	1	0	0	0	1	0	0	0	1	0	0	0	0	0
197132	32	3	24.56	0	0	1	0	1	0	0	0	1	0	0	0	1	0	0	0	0	0
191064	32	5	22.04	0	0	1	0	0	0	0	0	1	0	0	0	1	0	0	0	0	0
190383	26	3	18.93	0	1	1	0	0	0	0	0	1	0	0	0	0	0	0	0	0	1
190638	34	10	22.22	0	0	1	0	0	0	1	0	1	0	0	0	1	0	0	0	0	0
190418	27	2	24.09	0	0	1	0	0	0	0	0	1	0	0	0	1	0	0	0	0	0
191116	38	4	28.76	0	0	1	0	0	0	0	0	1	0	0	0	1	0	0	0	0	0
191127	36	7	23.83	0	1	1	0	0	0	0	0	1	0	0	0	1	0	0	0	0	1
190351	37	7	23.05	0	0	1	1	0	0	0	1	1	0	0	0	1	0	0	0	0	1
191141	39	3	21.36	0	0	1	0	1	0	0	0	1	0	0	0	1	0	0	0	0	0
191158	28	5	17.91	0	0	1	0	0	0	0	0	1	0	0	0	1	0	0	0	0	1
190804	26	6	19.15	0	0	1	0	0	0	0	0	1	0	0	0	1	0	0	0	0	0
191186	34	7	28.13	0	0	1	0	0	0	0	0	1	0	0	0	0	0	0	0	0	0
191196	32	6	26.04	0	0	1	0	1	0	0	0	1	0	0	0	1	0	0	0	0	1
191216	36	3.5	23.68	0	0	1	0	1	0	0	0	1	0	0	0	1	0	0	0	0	1
191239	28	5	20.17	0	1	1	0	0	0	0	0	1	0	0	0	1	0	0	0	0	1
190624	33	5.6	20.31	0	0	1	0	1	0	1	0	1	1	0	0	1	0	0	0	0	0
191265	37	2.5	23.01	0	1	1	0	0	0	0	0	1	0	0	0	1	0	0	0	0	1
191261	29	0.83	35.16	0	0	0	0	1	0	0	0	0	0	0	1	1	0	0	0	0	0
191263	23	2	18.82	0	0	1	0	1	0	0	0	0	0	0	1	1	0	0	0	0	0
190146	32	3	20.06	0	0	1	0	1	0	0	0	1	0	0	0	0	0	0	0	0	0
190758	29	1.5	26.04	0	0	1	0	0	0	0	0	1	1	0	0	1	0	0	0	0	0
190849	23	4	17.21	0	0	1	0	0	0	0	0	1	0	0	0	1	0	0	0	0	0
191269	29	2	27.97	0	0	1	0	1	0	0	0	1	0	0	0	1	0	0	0	0	0
191299	28	5	20.4	0	0	1	0	0	0	0	1	1	0	0	0	1	0	0	0	0	1
190403	35	4	23.44	0	0	1	0	0	0	0	0	1	0	1	0	1	0	0	0	0	0
236176	37	6	23.44	0	0	1	0	0	0	0	0	1	0	1	0	1	0	0	0	0	0
191327	24	5	25.81	0	0	1	0	0	0	0	1	1	1	0	0	1	0	0	0	0	0
191335	32	3	24.34	0	0	1	0	0	0	0	0	1	0	0	0	1	0	0	0	0	1
191344	30	7	20.2	0	0	1	0	1	0	0	0	1	0	0	0	1	0	0	0	0	0
191002	33	5	20.55	0	0	1	0	0	0	0	0	1	0	0	0	1	0	0	0	0	0
190408	29	1	20.7	0	0	1	0	0	0	1	0	1	0	0	0	1	0	0	0	0	0
191374	38	4	24.77	0	0	1	0	0	0	0	0	1	0	0	0	1	0	0	0	0	0
208512	39	5	24.77	0	0	1	0	0	0	0	0	1	0	0	0	1	0	0	0	0	1
190745	27	4	18.52	0	0	1	0	1	0	0	0	1	0	0	0	0	0	0	0	0	0
191117	35	5	27.06	0	0	1	0	0	0	0	0	1	0	0	0	1	0	0	0	0	1
191160	30	13	24.65	0	0	1	0	0	0	0	0	1	1	0	0	1	0	0	0	0	0
191537	25	3	23.88	0	1	1	0	0	0	0	0	1	0	0	0	1	0	0	0	0	0
190945	37	11	24.54	0	0	1	0	0	0	0	0	1	0	0	0	1	0	0	0	0	0
191541	36	2	23.82	0	0	1	0	0	0	1	0	1	0	1	0	1	0	0	0	0	0
191542	32	0.9	23.53	0	0	0	0	0	0	0	0	1	0	1	0	1	0	0	0	0	1
191538	29	3	17.8	0	0	1	0	0	0	0	0	1	0	0	0	0	0	0	0	0	0
190558	28	3	20.17	0	1	1	0	0	0	0	0	1	0	0	0	1	0	0	0	0	0
190631	27	4	22.22	0	1	1	0	0	0	0	0	1	0	0	0	1	1	0	0	0	1
190632	32	2.3	18.82	0	1	1	0	0	0	0	0	1	0	0	0	1	0	0	0	0	0
191592	31	6	25.15	0	0	1	0	0	0	0	0	1	0	0	0	1	0	0	0	0	1
191698	32	2.5	23.73	0	0	1	0	1	0	0	0	1	0	0	0	0	0	0	0	0	0
191706	30	2	18.03	0	0	1	0	1	0	0	0	1	0	0	0	1	0	0	0	0	0
191713	26	1	20.94	0	0	1	0	0	0	0	0	1	0	0	0	1	0	0	0	0	0
191714	35	1	30.04	0	0	1	0	0	0	0	0	1	0	1	0	1	0	0	0	0	0
191246	37	7	23.01	0	0	1	0	1	0	0	0	1	0	0	0	1	0	0	0	0	0
195056	38	7	23.01	0	0	1	0	1	0	0	0	1	0	0	0	1	0	0	0	0	0
191137	26	1	15.63	0	0	1	0	1	0	0	1	1	0	0	0	1	0	0	0	0	0
189421	31	3	31.16	0	0	1	0	0	0	0	0	1	0	1	0	1	0	0	0	0	0
190807	34	1	18.36	0	0	1	0	0	0	0	0	1	0	0	0	1	0	0	0	0	0
191254	39	13	21.63	0	0	1	0	0	0	0	0	1	0	0	0	1	0	0	0	0	0
197276	32	7	20	0	0	1	0	0	0	0	0	1	0	0	0	1	0	0	0	0	0
191614	31	9	22.66	0	0	1	0	0	0	0	1	1	0	0	0	1	0	0	0	0	0
191172	37	2	23.31	0	0	1	0	0	0	0	0	1	0	0	0	1	0	0	0	0	0
191825	26	4	24.91	0	0	1	0	0	0	0	0	1	0	0	0	1	0	0	0	0	1
191872	28	2.5	18.36	0	0	1	0	0	0	0	0	1	0	0	0	1	0	0	0	0	0
191576	26	1	21.83	0	0	1	0	0	0	0	0	1	0	0	0	1	0	0	0	0	0
191876	35	6	24.97	0	1	1	1	0	0	0	0	1	0	0	0	1	0	0	0	0	0
199115	36	7	24.97	0	1	1	1	0	0	0	0	1	0	0	0	1	0	0	0	0	0
211118	37	7	24.97	0	1	1	1	0	0	0	0	1	0	0	0	1	0	0	0	0	0
189433	34	8	23.03	0	1	1	0	0	0	0	0	1	0	1	0	1	0	0	0	0	1
191594	29	1	21.08	0	0	1	0	0	0	1	0	1	0	0	0	1	0	0	0	0	0
190108	32	4	20.06	0	0	1	0	0	0	0	0	1	0	0	0	0	0	0	0	0	1
190580	38	6	28.04	0	0	1	1	0	0	0	0	1	0	0	0	1	0	0	0	0	0
194866	38	6	28.04	0	0	1	1	0	0	0	0	1	0	0	0	1	0	0	0	0	0
191307	34	5	31.22	0	0	1	0	0	0	0	0	1	0	0	0	1	0	0	0	0	1
191933	26	2	23.44	0	0	1	0	0	0	0	0	1	0	0	0	1	0	0	0	0	0
191073	30	1	27.56	0	0	1	0	1	0	0	0	0	0	0	1	1	0	0	0	0	1
191999	32	10	29.97	0	0	1	0	0	0	0	0	1	0	0	0	1	0	0	0	0	0
192017	29	8	20.45	0	0	1	0	0	0	0	0	1	0	0	0	1	0	0	0	0	0
192026	30	5	25.97	0	0	1	0	0	0	0	1	1	0	0	0	1	0	0	0	0	0
191233	23	3	27.24	0	0	1	0	0	0	0	0	1	0	0	0	1	0	0	0	0	1
189561	37	1	30.27	0	0	1	0	0	0	0	0	1	0	0	0	1	0	0	0	0	0
191722	31	8	24.97	0	0	1	0	0	0	0	0	1	0	0	0	1	0	0	0	0	0
192082	31	3.9	25	0	1	1	0	0	0	0	0	1	0	0	0	1	0	0	0	0	0
191220	33	2.5	20.31	0	0	1	0	1	0	0	0	1	0	0	0	1	0	0	0	0	0
191680	32	2.8	24.55	0	0	1	0	1	0	0	0	1	0	0	0	1	0	0	0	0	0
192162	27	3	23.5	0	0	1	0	0	0	0	0	1	0	0	0	1	0	0	0	0	0
191745	35	3	24.84	0	0	1	0	0	0	0	0	1	0	1	0	1	0	0	0	0	1
192275	32	12	28.04	0	0	1	0	1	0	0	0	1	0	0	0	1	0	0	0	0	0
189414	34	5	25.88	0	0	1	0	0	0	0	0	1	0	1	0	1	0	0	0	0	1
192354	29	5	25.39	0	0	1	0	0	0	0	0	1	0	0	0	1	0	0	0	0	0
186775	32	5	22.07	0	0	1	0	0	0	0	1	1	0	0	0	1	0	0	0	0	0
192410	32	6	24.64	0	1	1	1	0	0	0	0	1	0	0	0	1	0	0	0	0	1
192445	29	2	27.63	0	0	1	0	0	0	0	0	1	0	0	0	1	0	0	0	0	0
191652	31	1.8	21.37	0	0	1	0	0	0	0	0	1	1	1	0	0	0	0	0	0	0
192491	35	8	21.36	0	0	1	1	0	0	0	0	1	0	0	0	1	0	0	0	0	0
191683	24	5	22.86	0	0	1	0	0	0	0	0	1	1	0	0	1	0	0	0	0	1
192297	24	1	23.44	0	1	1	0	1	0	0	0	1	0	0	0	1	0	0	0	0	0
192179	34	8	25	0	1	1	1	0	0	1	0	1	0	0	0	0	0	0	0	0	0
192539	32	4	22.03	0	0	1	1	0	0	0	0	1	0	0	0	1	0	0	0	0	0
190913	34	7	22.32	0	0	1	0	0	0	0	0	1	0	0	0	1	0	0	0	0	0
192512	35	3	21.36	0	0	1	0	0	0	0	0	1	1	0	0	0	0	0	0	0	1
190547	28	9	30.3	0	0	1	0	0	0	0	0	1	0	0	0	1	0	0	0	0	1
192580	33	8	20.43	0	1	1	0	0	0	0	0	1	0	0	0	0	0	0	0	0	0
198022	23	0.4	25.53	0	1	0	0	0	0	0	0	1	0	0	0	1	0	0	0	0	0
191708	34	3	20	0	1	1	0	1	0	0	0	1	0	1	0	1	0	0	0	0	0
190448	22	3	22.77	0	0	1	0	0	0	0	0	1	0	0	0	1	0	0	0	0	0
192135	40	1.3	19.91	0	0	1	1	0	0	0	0	1	0	0	0	1	0	0	0	0	0
192329	32	3	22.48	0	1	1	0	0	0	0	0	1	0	1	0	1	0	0	0	0	1
191382	29	3	19.72	0	0	1	0	0	0	0	0	1	0	0	0	1	0	0	0	0	0
192924	30	6.3	21.91	0	0	1	0	1	0	0	0	1	0	0	0	1	0	0	0	0	0
192222	28	1	18.22	0	0	1	0	0	0	0	0	1	0	0	0	0	0	0	0	0	0
192481	27	2	30.04	0	0	1	1	0	0	0	0	1	0	0	0	1	0	0	0	0	0
205715	29	3	27.77	0	1	1	0	1	0	0	0	1	0	0	0	1	0	0	0	0	0
209405	30	3	27.77	0	1	1	0	1	0	0	0	1	0	0	0	1	0	0	0	0	1
192483	33	9	24.97	0	0	1	0	0	0	0	0	1	0	0	0	1	0	0	0	0	0
193008	33	0.75	23.44	0	0	0	0	0	0	0	0	1	0	0	0	1	0	0	0	0	0
192624	33	0.3	18.73	0	1	0	0	1	0	0	0	1	0	0	0	1	0	0	0	0	0
190960	29	4	20.98	0	0	1	0	0	0	0	0	1	0	0	0	1	0	0	0	0	0
192277	27	4	20	0	0	1	0	0	0	0	0	1	0	0	0	1	0	0	0	0	1
193587	37	4	17.48	0	0	1	0	0	0	0	0	1	0	0	0	0	0	0	0	0	0
193653	27	0.6	17.97	0	0	0	0	1	0	0	1	1	0	0	0	0	0	0	0	0	1
193661	21	3	21.49	0	0	1	0	1	0	0	0	1	0	0	0	0	0	0	0	0	0
191292	25	5	22.64	0	1	1	0	1	0	0	0	0	0	0	1	1	0	0	0	0	1
218097	26	0.9	22.64	0	1	0	0	1	0	0	0	0	0	0	1	0	0	0	0	0	0
187409	24	0.5	26.35	0	1	0	0	1	0	0	0	1	0	0	0	0	0	0	0	0	0
193762	30	3	18.82	0	0	1	0	0	0	0	0	1	1	1	0	1	0	0	0	0	0
193751	32	7	23.63	0	0	1	0	0	0	0	0	1	0	0	0	1	0	0	0	0	0
193760	30	4	27.11	0	0	1	0	0	0	0	0	1	0	0	0	1	0	0	0	0	0
193833	38	7	20.7	0	1	1	0	0	0	0	0	1	0	0	0	0	0	0	0	0	1
193900	26	5	19.81	0	0	1	0	0	0	0	0	1	0	0	0	1	0	0	0	0	0
193921	26	6	22.63	0	0	1	0	0	0	0	0	1	0	0	0	1	0	0	0	0	0
192984	42	9	28.04	0	0	1	0	1	0	0	0	1	0	0	0	1	0	0	0	0	0
192501	30	3	19.98	0	0	1	0	1	0	0	0	1	1	0	0	1	0	0	0	0	1
193951	30	3	23.94	0	0	1	0	1	0	0	0	1	0	0	0	0	0	0	0	0	0
193561	31	6	26.67	0	0	1	0	0	0	0	0	1	0	0	0	1	0	1	0	0	0
192724	26	4	21.09	0	0	1	0	0	0	0	0	1	0	0	0	1	0	0	0	0	0
192197	26	6	25.97	0	0	1	0	1	0	0	0	1	0	0	0	1	0	0	0	0	0
193204	35	14	20.93	0	0	1	0	0	0	0	0	1	0	0	0	0	0	0	0	0	0
194241	37	3	27.77	0	0	1	1	0	0	0	0	1	0	0	0	1	0	0	0	0	0
193360	33	5	20.83	0	0	1	0	0	0	0	0	1	0	0	0	1	0	0	0	0	0
193443	25	2	19.56	0	0	1	0	0	0	0	0	1	0	0	0	1	0	0	0	0	0
194287	31	4.9	25.24	0	0	1	1	1	0	0	0	1	0	0	0	0	0	0	0	0	1
194433	31	1.5	21.48	0	0	1	1	0	0	0	1	1	0	0	0	1	0	0	0	0	0
194484	29	7	25.24	0	0	1	0	0	0	0	0	1	0	0	0	1	0	0	0	0	0
194483	37	9	21.64	0	0	1	0	0	0	0	0	1	0	0	0	1	0	0	0	0	0
193060	33	5	21.64	0	0	1	0	0	0	0	0	1	0	0	0	1	0	0	0	0	0
194565	28	2	24	0	0	1	1	0	0	0	0	1	0	0	0	1	0	0	0	0	0
192183	29	5	22.58	0	0	1	0	0	0	0	0	1	0	0	0	1	0	0	0	0	0
194608	27	8	21.44	0	0	1	0	1	0	0	0	1	0	0	0	1	0	0	0	0	0
194661	29	9	22.03	0	0	1	1	0	0	0	0	1	0	0	0	1	0	0	0	0	0
194694	30	5	27.22	0	0	1	0	1	0	0	0	1	0	0	0	0	0	0	0	0	0
194740	28	9	21.58	0	0	1	0	0	0	1	0	1	0	0	0	0	0	0	0	0	1
192710	30	3	25.39	0	0	1	0	1	0	0	0	1	0	0	0	0	0	0	0	0	1
194838	30	4	26.77	0	0	1	0	1	0	0	0	1	0	0	0	0	0	0	0	0	0
194084	36	6	30.11	0	0	1	0	0	0	0	0	1	0	0	0	1	0	0	0	0	0
194869	31	1.5	23.83	0	1	1	0	0	0	0	1	0	0	0	0	1	0	0	0	0	0
194867	36	9	28.76	0	0	1	1	0	0	0	0	1	0	0	0	1	0	0	0	0	1
194879	31	5	25.15	0	0	1	0	0	0	0	0	1	0	0	0	1	0	0	0	0	0
194877	30	6	30.11	0	0	1	0	0	0	0	0	1	0	0	0	0	0	0	0	0	0
191208	33	1.2	21.33	0	0	1	0	0	0	0	0	1	0	1	0	1	0	0	0	0	0
200025	34	1.5	21.33	0	0	1	0	0	0	0	0	1	0	1	0	1	0	0	0	0	0
213369	34	0.6	21.33	0	1	0	0	1	0	0	0	1	0	1	0	1	0	0	0	0	0
194964	23	6	24.44	0	0	1	0	0	0	0	0	1	0	0	0	1	0	0	0	0	0
194253	31	2	19.56	0	0	1	0	0	0	0	1	1	0	0	0	1	0	0	0	0	0
192749	21	2.6	17.45	0	1	1	0	0	0	0	0	1	0	0	0	1	0	0	0	0	1
193913	30	8	27.06	0	0	1	0	0	0	0	0	1	0	0	0	1	0	0	0	0	0
194996	35	9	28	0	0	1	1	1	0	0	0	1	0	1	0	0	0	0	0	0	0
191772	30	7.5	22.07	0	0	1	0	0	0	0	0	1	1	1	0	0	0	0	0	0	0
194244	33	7	19.53	0	0	1	0	0	0	0	0	1	1	0	0	1	0	0	0	0	0
195042	35	7	27.34	0	0	1	0	0	0	0	0	1	0	0	0	0	0	0	0	0	1
194195	28	9	34.48	0	0	1	0	0	0	0	0	1	0	0	0	0	0	0	0	0	0
195048	28	1	19.04	0	0	1	0	1	0	0	0	1	0	0	0	1	0	0	0	0	1
195058	28	3	30.02	0	0	1	1	0	0	0	0	1	0	0	0	1	0	1	0	0	0
191259	29	0.5	26.35	0	0	1	0	0	0	0	0	1	0	0	0	1	0	0	0	0	0
195264	33	9	26.78	0	0	1	0	0	0	0	0	1	0	0	0	1	0	0	0	0	0
194374	33	2	25.71	0	1	1	0	0	0	0	0	1	0	0	0	1	0	0	0	0	0
200010	27	10	26.67	0	0	1	0	0	0	0	0	1	0	0	0	1	0	0	0	0	0
195333	24	1.5	19.53	0	0	1	0	0	0	0	0	1	0	0	0	0	0	0	0	0	0
194775	40	10	28.89	0	0	1	0	0	0	1	0	1	0	0	0	1	0	0	0	0	0
195456	29	5	24.97	0	0	1	0	0	0	0	0	1	0	0	0	1	0	0	0	0	0
191757	29	9	22.6	0	0	1	0	1	0	0	0	1	0	0	0	0	0	0	0	0	0
194105	33	1	21.23	0	0	1	0	0	0	1	0	1	0	1	0	1	0	0	0	0	1
200374	27	3.5	23.31	0	1	1	0	0	0	0	0	1	0	0	0	1	0	0	0	0	0
208393	27	4	23.31	0	1	1	0	0	0	0	0	1	0	0	0	1	0	0	0	0	0
195580	33	2.5	20.7	0	0	1	0	0	0	0	0	1	0	0	0	1	0	0	0	0	0
193017	28	4	23.83	0	0	1	1	0	0	0	0	1	0	0	0	1	0	0	0	0	1
194995	32	6	23.52	0	0	1	1	0	0	0	0	1	0	0	0	1	0	0	0	0	1
194885	27	2.3	18	0	0	1	0	1	0	0	0	1	0	0	0	0	0	0	0	0	1
195766	25	3	23.71	0	1	1	0	0	0	0	0	1	0	0	0	1	0	0	0	0	0
194016	30	4	22.48	0	0	1	0	0	0	0	0	1	0	0	0	1	0	0	0	0	0
190698	25	6	17.78	0	0	1	0	0	0	0	0	1	0	0	0	1	0	0	0	0	1
195046	33	3	24.84	0	0	1	0	0	0	0	0	1	0	0	0	1	0	0	0	0	0
195195	28	2.8	28.23	0	0	1	0	0	0	0	0	1	0	0	0	1	0	0	0	0	0
194567	30	3	22.39	0	0	1	0	0	0	0	0	1	0	0	0	0	0	0	0	0	0
195970	41	2	26.37	0	0	1	0	0	0	0	0	1	0	0	0	1	0	0	0	0	0
195811	24	2	27.06	0	1	1	0	0	0	0	0	1	0	0	0	1	0	0	0	0	0
194725	26	4	16.36	0	0	1	0	1	0	0	0	1	0	0	0	0	0	0	0	0	0
196070	33	7	23.56	0	1	1	0	0	0	0	0	1	0	0	0	1	0	0	0	0	1
195452	29	5	27.06	0	0	1	0	0	0	0	0	1	1	0	0	0	0	0	0	0	0
196109	36	4	27.06	0	0	1	0	0	0	0	0	1	0	0	0	1	0	0	0	0	0
194038	32	2	22.72	0	0	1	0	1	0	0	0	1	0	1	0	0	0	0	0	0	0
194692	29	3	24.84	0	1	1	1	1	0	0	0	1	0	0	0	0	0	0	0	0	0
194264	33	7	19.7	0	0	1	0	0	0	0	0	1	0	0	0	1	0	0	0	0	1
193541	31	3	18.55	0	0	1	0	0	0	0	0	1	0	0	0	0	0	0	0	0	0
195464	27	1	27.29	0	0	1	0	0	0	0	0	1	0	0	0	0	0	0	0	0	0
195742	37	2	19.63	0	1	1	0	1	0	0	0	1	0	0	0	0	0	0	0	0	0
196437	30	2	27.99	0	0	1	1	0	0	0	0	1	0	0	0	1	0	0	0	0	0
207400	31	3	27.99	0	0	1	1	0	0	0	0	1	0	0	0	1	0	0	0	0	0
194321	37	8	23.71	0	0	1	0	0	0	0	0	1	0	0	0	1	0	0	0	0	0
196613	37	1	21.77	0	1	1	0	0	0	0	0	1	0	0	0	1	0	0	0	0	0
193956	38	16	30.48	0	1	1	0	1	0	0	0	1	0	0	0	0	0	0	0	0	0
206225	39	17	30.48	0	1	1	0	1	0	0	0	1	0	0	0	0	0	0	0	0	1
196006	28	1.8	20.89	0	1	1	0	1	0	0	0	1	0	0	0	0	0	0	0	0	0
196713	34	4	25.4	0	0	1	0	0	0	0	0	1	0	0	0	0	0	1	0	0	0
196739	30	2	26.81	0	1	1	0	0	0	0	0	1	0	0	0	1	0	1	0	0	0
195902	33	1	21.5	0	0	1	0	1	0	0	0	1	0	0	0	1	0	0	0	0	0
196796	36	2	18.66	0	0	1	0	0	1	0	0	1	0	0	0	1	0	1	0	0	0
196110	28	3	27.89	0	1	1	0	0	0	0	0	1	0	0	0	1	0	0	0	0	0
195512	35	5	20.4	0	0	0	0	0	0	1	0	1	0	0	0	1	0	0	0	0	0
193909	27	4	22.77	0	0	1	0	0	0	0	0	1	0	0	0	0	0	0	0	0	0
195341	24	6	17.67	0	0	1	0	0	0	0	0	1	0	0	0	0	0	0	0	0	1
195606	29	2	22.89	0	0	1	0	0	0	0	0	1	0	0	0	0	0	0	1	0	0
196481	29	4	26.04	0	0	1	0	0	0	0	0	1	0	0	0	1	0	0	0	0	0
197419	31	4	22.22	0	0	1	0	0	0	0	0	1	0	1	0	1	0	0	0	0	0
195878	27	4	25.46	0	0	1	0	0	0	0	0	1	0	0	0	1	0	0	0	0	1
197135	27	3	20	0	0	1	0	0	0	0	0	1	0	0	0	1	0	0	0	0	0
205663	34	8	17.79	0	0	1	0	1	0	0	0	1	0	0	0	1	0	0	0	0	0
196280	23	4	35.58	0	0	1	0	0	0	0	0	1	0	0	0	1	0	0	0	0	0
195600	27	3	20.44	0	0	1	0	0	0	0	0	1	0	0	0	1	0	0	0	0	0
197447	31	3.8	27.77	0	0	1	0	0	0	0	0	1	0	0	0	1	0	0	0	0	0
197493	38	1	20.31	0	0	1	0	0	0	0	0	1	0	0	0	1	0	0	0	0	0
196155	30	8	23.07	0	0	1	0	1	0	0	0	1	0	0	0	0	0	0	0	0	0
197549	23	4	19.77	0	0	1	0	0	0	0	0	1	0	0	0	1	0	0	0	0	0
197580	33	2	23.44	0	0	1	0	0	0	0	0	1	0	0	0	1	0	0	0	0	0
197586	27	4	18.79	0	0	1	0	0	0	0	0	1	0	0	0	1	0	0	0	0	0
197544	27	5	22.48	0	0	1	0	0	0	0	1	1	0	0	0	1	0	0	0	0	0
196077	27	5	26.67	0	0	1	0	0	0	0	0	1	0	0	0	1	0	0	0	0	0
196711	41	14	24.97	0	0	1	0	1	0	0	0	1	0	0	0	1	0	0	0	0	0
205510	42	15	24.97	0	0	1	0	1	0	0	0	1	0	1	0	1	0	0	0	0	0
204994	32	5	18.55	0	1	1	0	0	0	0	0	1	0	0	0	1	0	0	0	0	0
196540	29	1	32.99	0	0	1	0	0	0	0	0	1	0	0	0	1	0	0	0	0	0
192677	33	1	32	0	0	1	0	0	0	1	0	1	0	0	0	1	0	0	0	0	1
194913	35	10	20.68	0	1	1	0	1	0	0	0	1	0	0	0	0	0	0	0	0	1
209676	34	2	23.31	0	1	1	0	0	0	0	0	1	0	0	0	0	0	0	0	0	0
190883	32	5	28.04	0	0	1	0	1	0	0	0	1	1	0	0	0	0	0	0	0	0
197895	29	2	16.41	0	0	1	0	0	0	0	1	1	0	0	0	1	0	0	0	0	0
196670	31	3	26.64	0	0	1	0	0	0	0	0	1	1	0	0	0	0	0	0	0	0
196494	34	6	26.04	0	1	1	1	0	0	0	0	1	0	0	0	0	0	1	0	0	0
196813	31	1	20.69	0	0	1	0	0	0	0	0	1	0	0	0	1	0	0	0	0	0
198696	33	5	23.83	0	0	1	0	0	0	0	0	1	0	0	0	1	0	0	0	0	0
198084	29	0.7	21.23	0	0	0	0	1	0	0	0	1	0	0	0	1	0	0	0	0	0
197061	31	4	20.83	0	0	1	0	0	0	0	0	1	0	0	0	1	0	0	0	0	1
193511	32	3	22.66	0	0	1	0	1	0	0	0	1	0	0	0	0	0	0	0	0	0
195689	29	5	21.63	0	0	0	0	0	0	0	0	1	0	0	0	1	0	0	0	0	1
199408	30	4	20.81	0	0	1	0	0	0	0	0	1	0	0	0	0	0	0	0	0	0
198173	39	15	17.69	0	0	1	0	0	0	0	0	1	0	0	0	1	0	0	0	0	0
196806	36	1	30.04	0	0	1	0	0	0	0	0	1	0	1	0	1	0	0	0	0	0
198049	31	5	19.23	0	0	1	0	1	0	0	0	1	0	0	0	1	0	0	0	0	0
198068	28	4	22.03	0	0	1	0	0	0	0	0	1	0	0	0	1	0	0	0	0	0
198561	35	12	25.1	0	1	1	0	0	0	0	0	1	0	0	0	1	0	0	0	0	0
198563	27	1	23.88	0	0	1	0	0	0	0	0	1	0	0	0	1	0	0	0	0	0
217478	29	1.8	23.88	0	0	1	0	1	0	0	0	1	0	0	0	1	0	0	0	0	0
197837	37	4	23.43	0	0	1	0	0	0	0	0	1	0	0	0	1	0	0	0	0	0
198521	31	6	26.01	0	0	1	0	0	0	0	0	1	0	0	0	1	0	0	0	0	1
198643	38	4	24.24	0	0	1	1	0	0	0	0	1	0	0	0	0	0	0	0	0	0
211181	38	4	24.24	0	0	1	1	0	0	0	0	1	0	0	0	0	0	0	0	0	1
198150	37	5	18.73	0	0	1	0	1	0	0	0	1	0	0	0	0	0	0	0	0	0
198549	31	8	27.78	0	0	1	0	0	0	0	0	1	0	0	0	1	0	0	0	0	0
214378	32	0.2	27.78	0	0	0	0	1	0	0	0	1	0	0	0	1	0	0	0	0	1
198347	27	2.6	18.37	0	1	1	0	0	0	0	0	1	0	0	0	0	0	0	0	0	0
206500	27	3	18.37	0	1	1	0	0	0	0	0	1	0	0	0	0	0	0	0	0	0
197601	28	0.3	26.04	0	0	0	0	0	0	0	0	1	0	0	0	1	0	0	0	0	0
198246	32	3	32.74	0	0	1	0	0	0	0	0	1	0	0	0	1	0	0	0	0	0
198588	34	1	22.89	0	1	1	0	0	0	0	0	1	0	0	0	1	0	0	0	0	1
196652	31	7	25.08	1	0	1	0	0	0	0	0	1	0	0	0	1	0	0	0	1	0
210232	32	8	25.08	1	0	1	0	1	0	0	0	1	0	0	0	0	0	0	0	1	0
198092	33	2	19.65	0	0	1	0	1	0	0	0	1	0	0	0	1	0	0	0	0	1
197756	28	2	25.53	0	0	1	0	0	0	0	0	1	0	0	0	1	0	0	0	0	1
198216	38	1.2	22.6	0	1	1	0	0	0	0	0	1	0	0	0	1	0	0	0	0	1
198636	21	4	19.92	0	0	1	0	0	0	0	0	1	0	0	0	1	0	0	0	0	0
208268	22	5	19.92	0	0	1	0	0	0	0	0	1	0	0	0	1	0	0	0	0	0
198404	30	1	21.37	0	0	1	0	0	0	0	0	1	0	0	0	1	0	0	0	0	0
198562	40	6.1	26.45	0	0	1	1	0	0	1	0	1	0	1	0	1	0	0	0	0	0
195780	37	3	19.49	0	0	1	0	0	0	0	0	1	0	0	0	0	0	0	0	0	0
205091	38	4	19.49	0	0	1	0	0	0	0	0	1	0	0	0	0	0	0	0	0	0
198245	32	5	27.77	0	0	1	0	0	0	0	0	1	0	0	0	1	0	1	0	0	0
198712	38	4	20.4	0	0	1	0	1	0	0	0	1	0	1	0	1	0	0	0	0	0
198765	35	6	31.96	0	0	1	0	0	0	0	0	1	0	0	0	1	0	0	0	0	0
206775	35	6	31.96	0	0	1	0	1	0	0	0	1	0	0	0	0	0	0	0	0	0
198532	37	2	29.3	0	0	1	0	1	0	0	0	1	0	0	0	0	0	0	0	0	0
199185	34	8	25.03	0	0	1	0	0	0	0	0	1	0	0	0	1	0	0	0	0	0
199638	31	3	23.62	0	0	1	0	0	0	0	0	1	0	0	0	1	0	0	0	0	1
199292	26	8	23.11	0	0	1	0	0	0	0	0	1	0	0	0	1	0	0	0	0	0
199532	38	13	24.46	0	0	1	0	0	0	0	0	1	0	0	0	1	0	0	0	0	0
198585	29	0.4	21.97	0	0	0	0	1	0	0	0	1	0	1	0	0	0	0	0	0	0
197133	30	3	22.51	0	0	1	0	0	0	0	0	1	0	0	0	1	0	0	0	0	0
199983	39	1.9	21.78	0	0	1	1	1	0	0	0	1	0	0	0	1	0	0	0	0	1
199323	38	2	26.18	0	0	1	0	0	0	0	0	1	0	0	0	1	0	0	0	0	0
200016	31	10	22.76	0	0	1	0	0	0	0	0	1	0	0	0	1	0	0	0	0	1
200066	34	6	22.48	0	0	1	1	0	0	0	0	1	0	0	0	1	0	0	0	0	1
195578	33	6	18.37	0	0	1	0	0	0	0	0	1	0	0	0	1	0	0	0	0	0
197663	32	1	17.48	0	0	1	0	0	0	0	0	1	0	0	0	1	0	0	0	0	1
200126	34	4	22.04	0	0	1	0	1	0	0	0	1	0	0	0	0	0	0	0	0	0
200144	38	0.5	23.63	1	0	1	0	1	0	0	0	1	0	0	0	1	0	0	0	0	0
197783	29	5	21.64	0	0	1	0	0	0	0	0	1	0	0	0	1	0	0	0	0	1
196097	34	3	19.43	0	0	1	0	0	0	0	0	1	0	0	0	1	0	0	0	0	0
199348	24	1.5	18.22	0	0	1	0	0	0	0	0	1	0	0	0	1	0	0	0	0	0
200292	35	2	23.81	0	1	1	0	0	0	0	1	1	0	0	0	0	0	0	0	0	1
196742	36	6	24.97	0	1	1	0	0	0	0	0	1	0	0	0	0	0	0	0	0	0
196967	29	3	28.72	0	0	1	0	0	0	0	0	1	0	0	0	1	0	1	0	0	1
200397	31	7	22.22	0	0	1	0	0	0	0	0	1	0	0	0	1	0	0	0	0	0
199843	30	4	26.03	0	0	1	0	0	0	0	0	1	0	0	0	1	0	0	0	0	0
196112	38	10	21.23	0	0	1	0	1	0	0	0	1	0	0	0	0	0	0	0	0	0
199718	24	4.5	17.44	0	0	1	0	0	0	0	0	1	0	0	0	1	0	0	0	0	1
199274	26	5	26.37	0	0	1	0	0	0	0	0	1	0	0	0	0	0	0	0	0	0
200529	30	2	21.99	0	0	1	0	0	0	0	0	1	0	0	0	1	0	0	0	0	0
199367	31	2	21.33	0	0	1	0	0	0	0	0	1	0	0	0	0	0	0	0	0	0
200012	35	3	29.82	0	0	1	0	1	0	0	0	1	0	0	0	1	0	0	0	0	1
201511	28	3	28.6	0	0	1	0	0	0	0	0	1	0	0	0	1	0	0	0	0	0
200613	33	7	19.53	0	0	1	0	0	0	0	0	1	0	0	0	0	0	0	0	0	0
204441	32	5	24.67	0	1	1	0	1	0	0	0	1	0	0	0	0	0	0	0	0	1
197029	35	10	23.92	0	0	1	0	0	0	0	0	1	0	0	0	0	0	0	0	0	1
198470	22	2.8	19.11	0	1	1	1	0	0	0	0	1	0	0	0	1	0	0	0	0	0
199913	29	10	27.78	0	0	1	0	1	0	0	0	1	0	0	0	1	0	0	0	0	0
200125	31	3	20.83	0	0	1	0	0	0	0	0	1	0	0	0	0	0	0	0	0	0
200363	38	1	26.14	0	0	1	0	0	0	0	1	1	0	0	0	1	0	0	0	0	0
202455	27	2	24.97	0	1	1	0	0	0	0	0	1	0	0	0	1	0	0	0	0	0
202535	39	7	27.89	0	0	1	0	0	1	0	0	1	1	0	0	1	0	0	0	0	0
200622	27	6	28.01	0	0	1	0	0	0	0	0	1	0	0	0	1	0	0	0	0	1
200198	30	5	19.03	0	0	1	0	0	0	0	1	1	0	1	0	1	0	0	0	0	0
202666	34	11	20.81	0	0	1	0	1	0	0	0	1	0	0	0	1	0	0	0	0	0
202696	40	4	29.97	0	0	1	0	0	0	0	0	1	0	0	0	0	0	0	0	0	0
202706	33	3	23.32	0	0	1	0	0	0	0	0	1	0	0	0	1	0	0	0	0	0
203682	32	0.7	23.81	0	0	1	0	1	0	0	0	1	0	0	0	0	0	0	0	0	0
200700	29	9	23.44	0	0	1	0	0	0	0	0	1	0	0	0	1	0	0	1	0	0
200403	27	6	17.75	0	0	1	0	1	0	0	0	1	0	0	0	0	0	0	0	0	0
199450	26	5	26.22	0	1	1	0	0	0	0	0	1	0	0	0	1	0	0	0	0	0
203810	34	11	25.68	0	1	1	0	1	0	0	0	1	0	0	0	1	0	0	0	0	0
202204	33	2	28.89	0	0	1	0	0	0	0	0	1	0	1	0	1	0	0	0	0	0
209878	33	2	28.89	0	0	1	0	1	0	0	0	1	0	1	0	0	0	0	0	0	1
203908	39	6	24.03	0	0	1	0	1	0	0	0	1	0	0	0	0	0	0	0	0	0
199168	33	7	20.31	0	0	1	0	1	0	0	0	1	1	1	0	1	0	0	0	0	0
202344	26	1.4	22.06	0	0	1	0	0	0	0	0	1	0	0	0	1	0	0	0	0	0
203975	25	6	18.82	0	1	1	0	0	0	0	0	1	0	0	0	1	0	0	0	0	0
200695	38	8	22.44	0	1	1	0	0	0	0	0	1	0	0	0	1	0	0	0	0	0
200732	28	4	24.8	0	1	1	0	1	0	0	0	1	0	0	0	1	0	0	0	0	0
204102	27	1	21.81	0	0	1	0	0	0	0	0	1	0	0	0	1	0	0	0	0	0
202619	31	4	32.42	0	0	1	0	1	0	0	0	1	0	1	0	0	0	0	0	0	0
204153	33	3	19.78	0	0	1	0	0	0	0	0	1	0	0	0	1	0	0	0	0	0
204159	34	3	30.76	0	0	1	0	0	0	0	0	1	0	0	0	0	0	0	0	0	0
202722	28	6	27.64	0	0	1	1	0	0	0	0	1	0	0	0	1	0	0	0	0	0
201507	26	5	24.44	0	0	1	0	0	0	0	0	1	0	0	0	0	0	0	0	0	0
196828	36	5	20.5	0	0	1	0	0	0	0	0	1	0	0	0	0	0	0	0	0	0
204322	36	2	21.23	0	0	1	0	0	0	0	0	1	0	0	0	1	0	0	0	0	0
196963	27	2	19.23	0	0	1	0	0	0	0	0	1	0	0	0	1	0	0	0	0	0
203744	32	2	24.22	0	0	1	0	1	0	0	0	1	1	0	0	1	0	0	0	0	0
221182	33	3	24.22	0	0	1	0	1	0	0	0	1	1	0	0	1	0	0	0	0	0
203905	28	2	22.21	0	0	1	0	0	0	0	0	1	0	0	0	0	0	0	0	0	0
204140	30	5	24.03	0	1	1	0	1	0	0	0	1	0	0	0	1	0	0	0	0	0
199874	30	7	20	0	0	1	0	0	0	0	0	1	0	0	0	1	0	0	0	0	0
200513	36	11	29.79	0	0	1	0	1	0	0	0	1	0	0	0	0	0	0	0	0	0
202550	29	4	19.77	0	1	1	0	0	0	0	0	1	0	0	0	1	0	0	0	0	0
202593	29	2	25.04	0	0	1	0	1	0	0	0	1	0	0	0	1	0	0	0	0	0
199936	32	9	18.9	0	0	1	0	1	0	0	0	1	0	0	0	0	0	0	0	0	1
203758	34	6	28.89	0	0	1	0	1	0	0	0	1	0	0	0	0	0	0	0	0	0
202743	31	9	23.03	0	0	1	0	0	0	0	0	1	0	0	0	1	0	0	0	0	0
204197	34	9	23.65	0	0	1	0	0	0	0	0	1	0	0	0	1	0	0	0	0	0
204708	25	4	24.41	0	0	1	0	1	0	0	0	1	0	0	0	1	0	0	0	0	0
204077	24	2	27.43	0	1	1	0	0	0	0	0	1	0	0	0	1	0	0	0	0	0
204175	31	1	22.52	0	1	1	0	0	0	0	0	1	0	0	0	0	0	0	0	0	0
204634	36	12	25.63	0	0	1	0	1	0	0	0	1	0	0	0	1	0	0	0	0	0
204884	29	4	20.08	0	0	1	0	1	0	0	0	1	0	0	0	1	0	0	0	0	0
198663	29	4	27.19	0	0	1	0	1	0	0	0	1	0	0	0	0	0	0	0	0	0
209707	30	4	27.19	0	0	1	0	1	0	0	0	1	0	0	0	0	0	0	0	0	0
200343	30	3	22.83	0	0	1	0	0	0	0	0	1	1	0	0	1	0	0	0	0	0
205003	28	10	19.48	0	0	1	0	1	0	0	0	1	0	0	0	0	0	0	0	0	0
205024	32	1	21.63	0	0	1	0	1	0	0	0	1	0	0	0	1	0	0	0	0	1
205012	27	4	24.97	0	1	1	0	1	0	0	0	1	0	0	0	1	0	0	0	0	0
205071	31	1	22.68	0	0	1	0	0	0	0	0	1	0	0	0	1	0	0	0	0	0
204714	24	5	25.15	0	0	1	0	0	0	0	0	1	0	0	0	1	0	0	0	0	0
205133	29	1.5	20.44	0	0	1	1	1	0	0	0	1	0	0	0	1	0	0	0	0	0
216164	28	10	25.39	0	0	1	0	1	0	0	0	1	0	0	0	0	0	0	0	0	0
203898	40	1	22.6	0	1	1	0	1	0	0	0	1	0	0	0	1	0	0	0	0	1
206364	33	4	24	0	0	1	0	0	0	0	0	1	0	1	0	0	0	0	0	0	0
204538	43	6	25.48	0	0	1	1	0	0	0	0	1	0	0	0	1	0	0	0	0	0
198581	34	11	20.58	0	1	1	0	0	0	0	0	1	0	0	0	1	0	0	0	0	0
200783	32	5	32.05	0	0	1	0	0	0	0	1	1	0	0	0	1	0	0	0	0	0
205302	35	2	23.44	0	1	1	0	1	0	0	0	1	0	0	0	0	0	0	0	0	0
204662	29	3	26.84	0	0	1	0	1	0	0	0	1	0	0	0	1	0	0	0	0	0
200362	31	12	23.81	0	1	1	0	0	0	0	0	1	0	0	0	1	0	0	0	0	0
204755	37	2	25.39	0	0	1	0	1	0	0	0	1	0	0	0	1	0	0	0	0	0
205562	30	3	19.72	0	0	1	0	1	0	0	0	1	0	0	0	0	0	0	0	0	1
205675	32	1	19.98	0	1	1	0	0	0	0	0	1	0	0	0	0	0	0	0	0	0
203974	29	6	23.23	0	1	1	0	1	0	0	0	1	0	0	0	1	0	0	0	0	0
218460	30	0.5	23.23	0	1	0	0	1	0	0	0	1	0	0	0	1	0	0	0	0	1
204323	26	0.8	23.15	0	1	0	0	0	0	0	0	1	0	0	0	0	0	0	0	0	0
204975	30	4.5	25.24	0	0	1	0	1	0	0	0	1	0	0	0	0	0	0	0	0	0
204416	24	5	22.48	0	0	1	0	1	0	0	0	1	0	0	0	1	0	0	0	0	0
205829	36	5	23.51	0	0	1	0	1	0	0	0	1	0	1	0	1	0	0	0	0	1
205869	25	4	19.59	0	0	1	0	0	0	0	0	1	0	0	0	1	0	0	0	0	0
205173	33	2	24.54	0	0	1	0	1	0	0	0	1	0	0	0	1	0	0	0	0	0
205775	31	1.5	23.23	0	0	1	0	1	0	0	0	1	0	0	0	1	0	0	0	0	0
205365	39	12	22.31	0	0	1	0	1	0	0	0	1	0	1	0	1	0	0	0	0	1
204278	27	6	24.97	0	1	1	0	0	0	0	0	1	0	0	0	1	0	0	0	0	1
211154	26	2	19.15	0	0	1	1	1	0	0	0	1	0	0	0	0	0	0	0	0	0
206135	29	3	23.83	0	0	1	0	1	0	0	0	1	0	0	0	1	0	0	0	0	0
205026	31	10	24.03	0	0	1	0	0	0	0	0	1	0	0	0	0	0	0	0	0	0
206212	30	2	23.05	0	0	1	0	1	0	0	0	1	0	0	0	1	0	0	0	0	0
205646	27	7	21.88	0	0	1	0	0	0	0	0	1	0	0	0	1	0	0	0	0	0
206309	24	3	24	0	0	1	0	0	0	0	0	1	0	0	0	0	0	0	0	0	0
215518	25	3	24	0	0	1	0	0	0	0	0	1	0	0	0	0	0	0	0	0	0
206347	35	5	28.44	0	0	1	0	1	0	0	0	1	1	0	0	1	0	0	0	0	0
210595	35	5	28.44	0	0	1	0	1	0	0	0	1	1	0	0	1	0	0	0	0	0
217777	36	5	28.44	0	0	1	1	1	0	0	0	1	0	0	0	1	0	0	0	0	0
205629	33	2	21.76	0	1	1	0	1	0	0	0	1	0	0	0	1	0	0	0	0	0
206455	24	2	19.2	0	0	1	0	0	0	0	0	1	0	0	0	0	0	0	0	0	1
205977	38	11	25.04	0	0	1	0	1	0	0	0	1	0	0	0	0	0	0	0	0	0
206494	25	4	20.03	0	0	1	0	1	0	0	0	1	0	0	0	0	0	0	0	0	0
206399	38	7	26.84	0	0	1	0	0	0	0	0	1	0	0	0	1	0	0	0	0	1
206624	31	11	25.15	0	0	1	0	1	0	0	0	1	0	0	0	0	0	0	0	0	0
204374	30	9	20.49	0	1	1	1	1	0	0	0	1	0	0	0	0	0	0	0	0	1
205793	27	5	28.16	0	0	1	0	1	0	0	0	1	0	0	0	1	0	0	0	0	0
206827	35	11.9	29.76	0	0	1	0	1	0	0	0	1	0	0	0	1	0	0	0	0	0
206351	33	3	27.34	0	0	1	0	0	0	0	0	1	0	1	0	0	0	0	0	0	0
206369	26	3	26.17	0	0	1	0	1	0	0	0	1	0	0	0	1	0	0	0	0	0
206958	36	1	25.33	0	0	1	0	1	0	0	0	1	0	0	0	0	0	0	0	0	0
205932	36	6	28.89	0	0	1	0	0	0	0	0	1	1	0	0	1	0	1	0	0	0
208310	36	6	28.89	0	0	1	0	0	0	0	0	1	1	0	0	1	0	1	0	0	0
206615	27	5	20.08	0	0	1	0	0	0	0	0	0	0	0	1	0	0	0	0	0	0
205039	35	1.3	19.92	0	1	1	0	0	0	0	0	1	0	0	0	0	0	0	0	0	0
207092	38	3	24.97	0	0	1	0	1	0	0	0	1	0	0	0	1	0	0	0	0	0
206095	30	4	34.17	0	0	1	0	0	0	1	0	1	0	0	0	1	0	0	0	0	0
207145	34	4	28.04	0	0	1	0	1	0	0	1	1	0	0	0	0	0	0	0	0	0
195683	33	6	28.2	0	1	1	0	0	0	0	1	1	0	0	0	1	0	0	0	0	0
207193	24	1	21.97	0	0	1	0	1	0	0	0	1	1	0	0	1	0	0	0	0	0
208419	35	2	23.63	0	0	1	0	1	0	0	0	1	0	0	0	1	0	0	0	0	0
197245	33	3	25.07	0	0	1	0	0	0	0	0	1	0	0	0	0	0	0	0	0	0
206598	29	0.6	21.09	0	0	0	0	1	0	0	0	1	0	0	0	0	0	0	0	0	1
206550	27	3	22.43	0	0	1	0	0	0	0	0	1	0	0	0	0	0	0	0	0	0
192664	34	6	24.24	0	0	1	0	0	0	0	0	1	0	0	0	1	0	0	0	0	0
206155	32	3	21.88	0	0	1	0	0	0	0	0	1	0	1	0	0	0	0	0	0	0
207333	27	3	23.31	0	0	1	0	0	0	0	0	1	0	0	0	0	0	0	0	0	0
207353	34	6	20.28	0	0	1	0	1	0	0	0	1	0	0	0	1	0	0	0	0	0
236196	35	7	20.28	0	0	1	0	1	0	0	0	1	0	0	0	1	0	0	0	0	0
199538	31	6	20.43	0	1	1	0	0	0	1	0	1	0	0	0	1	0	0	0	0	0
206263	26	4	22.35	0	0	1	0	1	0	0	0	0	0	0	1	0	0	0	0	0	0
206187	29	8	26.17	0	0	1	1	1	0	0	0	1	0	0	0	0	0	0	0	0	0
193127	33	0.6	20.08	0	0	0	0	1	0	0	0	1	0	0	0	1	0	0	0	0	0
207451	28	1	31.25	0	0	1	0	1	0	0	0	1	0	0	0	1	0	0	0	0	0
207462	33	0.7	16.89	0	0	0	0	1	0	0	0	1	0	0	0	1	0	0	0	0	0
206215	30	7	23.53	0	0	1	0	0	0	0	0	1	0	0	0	0	0	0	0	0	0
211637	30	7	23.53	0	0	1	0	1	0	0	0	1	0	0	0	0	0	0	0	0	0
207063	40	8	24.24	0	0	1	0	1	1	0	0	1	0	0	0	1	0	0	0	0	0
206191	38	3	28.23	0	0	1	0	1	0	0	0	1	0	0	0	1	0	0	0	0	0
207548	29	6	23.73	0	0	1	0	1	0	0	0	1	0	0	0	0	0	0	0	0	0
206506	33	1	19.1	0	0	1	0	1	0	0	0	1	0	0	0	1	0	0	0	0	0
206531	27	2.5	20.4	0	0	1	0	0	0	0	0	1	0	0	0	0	0	0	0	0	1
207575	31	1.3	20.08	0	0	1	0	0	1	0	0	1	0	0	0	1	0	0	0	0	0
207587	35	7	27.15	0	0	1	0	1	0	0	0	1	0	0	0	0	0	0	0	0	0
206996	28	1	21.23	0	0	1	0	0	0	0	1	1	0	0	0	0	0	0	0	0	0
206067	28	1.5	23.44	0	0	1	0	1	0	0	0	1	0	0	0	0	0	0	0	0	1
207657	31	5	22.96	0	0	1	0	0	0	0	0	1	0	1	0	0	0	0	0	0	1
207660	33	2.5	26.22	0	0	1	0	1	0	0	0	1	0	0	0	0	0	0	0	0	0
198250	30	0.9	30.86	0	1	0	0	1	0	1	0	1	0	0	0	0	0	0	0	0	0
207812	39	1	23.34	0	1	1	0	0	0	0	0	1	0	0	0	0	0	0	0	0	0
206420	31	5	19.56	0	0	1	0	0	0	0	0	1	0	0	0	0	0	0	0	0	0
207244	33	8	23.5	0	0	1	1	0	0	0	0	1	0	0	0	0	0	0	0	0	0
206943	28	1	20.55	0	0	1	0	1	0	0	0	1	0	0	0	0	0	0	0	0	0
206657	24	3	19.23	0	0	1	0	0	0	0	0	1	0	0	0	1	0	0	0	0	0
207949	30	8	25.72	0	0	1	1	1	0	0	0	1	0	0	0	1	0	0	0	0	0
204861	32	4	23.73	0	0	1	0	0	0	0	0	1	0	1	0	0	0	0	0	0	0
212841	32	4	23.73	0	0	1	0	0	0	0	0	1	0	1	0	0	0	0	0	0	1
204642	33	9	24.45	0	1	1	0	1	0	0	0	1	0	0	0	1	0	0	0	0	0
208201	33	4	28.13	0	1	1	0	1	0	0	0	1	0	0	0	1	0	0	0	0	1
208219	34	1	23.23	0	0	1	1	0	0	0	0	1	0	0	0	0	0	0	0	0	0
215551	35	2.1	23.23	0	0	1	1	0	0	0	0	1	0	0	0	0	0	0	0	0	0
208262	28	2	21.52	0	0	1	0	1	0	0	0	1	0	0	0	0	0	0	0	0	0
206566	35	3	24.97	0	0	1	0	1	0	0	0	1	0	0	0	0	0	0	0	0	0
207644	34	4	30.3	0	1	1	0	1	0	0	0	1	0	0	0	0	0	0	1	0	1
208377	29	4	20.81	0	0	1	0	0	0	0	0	1	0	0	0	0	0	0	0	0	1
205851	36	18	31.99	0	1	1	0	1	0	0	0	1	0	0	0	0	0	0	0	0	0
207144	28	2	25.64	0	0	1	0	1	0	0	0	1	0	0	0	0	0	0	0	0	0
208515	30	2	17.75	0	0	1	0	0	0	0	0	1	0	0	0	0	0	0	0	0	0
206262	38	1.6	24.73	0	0	1	1	0	0	0	0	0	0	0	1	1	0	0	0	0	0
207332	33	2	20.83	0	0	1	0	0	0	0	0	1	0	0	0	0	0	0	0	0	1
208550	25	5	20.51	0	0	1	0	0	0	0	0	1	0	0	0	0	0	0	0	0	1
206107	26	7	26.71	0	0	1	0	0	0	0	0	1	0	0	0	0	0	0	0	0	0
207953	25	4	22.48	0	0	1	0	1	0	0	0	1	0	1	0	1	0	0	0	0	1
208557	30	13	26.04	0	1	1	1	1	0	0	0	1	0	0	0	1	0	0	0	0	0
207886	35	4	25.63	0	0	1	0	0	0	0	0	1	0	1	0	0	0	0	0	0	0
208563	34	3	21.21	0	1	1	1	1	0	0	0	1	0	0	0	1	0	0	0	0	1
208568	28	6	22.41	0	0	1	0	0	0	0	0	1	0	0	0	0	0	0	0	0	0
212684	29	6	22.41	0	0	1	0	0	0	0	0	1	0	0	0	0	0	0	0	0	0
208548	26	0.8	18.83	0	0	0	0	0	0	0	0	1	0	0	0	0	0	0	0	0	0
208627	34	4	24.39	0	0	1	0	0	0	0	0	1	0	0	0	0	0	0	0	0	1
208639	37	5	27.55	0	0	1	0	0	0	0	0	1	0	0	0	0	0	0	0	0	0
208857	29	2	26.04	0	1	1	0	1	0	0	0	1	0	0	0	0	0	0	0	0	0
208902	41	12	29.26	0	0	1	0	1	0	0	0	1	0	0	0	0	0	0	0	0	0
207764	35	11	24.77	0	1	1	1	0	0	0	0	1	0	0	0	1	0	0	0	0	0
208238	33	3	19.1	1	0	1	0	0	0	0	0	1	0	1	0	0	0	0	0	0	0
207668	31	4	20.57	0	1	1	0	1	0	0	0	1	0	0	0	0	0	0	0	0	1
207860	35	5	28.44	0	0	1	0	1	0	0	0	1	0	0	0	0	0	1	0	0	1
208378	24	4	19.68	0	0	1	0	1	0	0	0	1	0	0	0	0	0	0	0	0	0
206405	23	4	30.86	0	1	1	0	1	0	0	0	1	0	0	0	1	0	0	0	0	0
207417	28	3	25.81	0	0	1	0	1	0	0	0	1	0	0	0	0	0	0	0	0	0
208405	31	4	27.06	0	0	1	0	1	0	0	0	1	0	0	0	0	0	0	0	0	0
208733	24	3	20.28	0	0	1	0	1	0	0	0	1	0	0	0	1	0	1	0	0	0
205190	39	6	28.62	0	0	1	0	1	0	0	0	1	0	1	0	0	0	0	0	0	1
207766	37	5	19.28	0	0	1	0	1	0	0	0	1	0	0	0	0	0	0	1	0	1
207851	25	2	25.07	0	1	1	0	1	0	0	0	1	0	1	0	1	0	0	0	0	0
207323	31	7	23.5	0	0	1	0	1	0	0	0	1	0	0	0	0	0	0	0	0	1
209114	30	5	29.33	0	1	1	0	1	0	0	0	1	0	0	0	0	0	0	0	0	0
208265	27	8	16	0	0	1	0	1	0	0	0	1	0	0	0	0	0	0	1	0	0
208212	31	0.5	28.04	0	0	0	0	1	0	0	0	1	0	0	0	1	0	0	0	0	0
209428	31	3	27.63	0	0	1	0	1	0	0	0	1	0	0	0	1	0	0	0	0	0
209295	25	1	24.88	0	1	1	0	1	0	0	0	1	0	0	0	0	0	0	0	0	1
209393	32	1	18.22	0	0	1	1	0	0	0	0	1	0	0	0	0	0	0	0	0	0
208476	41	10	24.14	0	0	1	0	0	0	0	0	1	0	0	0	0	0	0	0	0	0
207997	30	4	21.36	0	0	1	0	1	0	0	0	1	0	0	0	0	0	0	0	0	0
220303	30	5	21.36	0	0	1	0	1	0	0	0	1	0	0	0	0	0	0	0	0	0
208263	33	3	22.15	0	0	1	0	0	0	0	0	1	0	0	0	1	0	0	0	0	0
208943	26	1	22.6	0	0	1	0	0	0	0	0	1	0	0	0	0	0	0	0	0	0
208336	24	2	18.73	0	0	1	0	1	0	0	0	1	0	0	0	1	0	0	0	0	0
209602	27	3	23.37	0	0	1	0	0	0	0	0	1	0	0	0	0	0	0	0	0	0
209047	24	4	24.46	0	1	1	0	1	0	0	0	1	0	0	0	0	0	0	0	0	0
209015	31	2	22.27	0	1	1	0	1	0	0	0	1	0	0	0	0	0	0	0	0	0
209791	30	7	25.64	0	0	1	0	0	0	0	1	1	0	0	0	1	0	0	0	0	0
209221	30	11	17.58	0	1	1	0	1	0	0	0	1	0	0	0	1	0	0	0	0	0
208418	31	1	27.77	0	0	1	0	0	0	0	0	1	0	0	0	0	0	0	0	0	0
209870	34	5	24.44	0	0	1	1	0	0	0	0	1	0	0	0	0	0	0	0	0	0
207155	29	1	17.94	0	0	1	0	1	0	0	0	1	0	0	0	1	0	0	0	0	1
208891	32	3	21.11	0	0	1	0	1	0	0	0	1	1	0	0	0	0	0	0	0	0
209945	25	4	22	0	0	1	0	1	0	0	0	1	0	0	0	0	0	0	0	0	0
204160	32	5	28.41	0	0	1	0	0	0	0	1	1	1	0	0	1	0	0	0	0	1
209973	26	5	24.44	0	0	1	0	0	0	0	0	1	0	0	0	0	0	0	0	0	0
210004	29	2	23.44	0	1	1	0	1	0	0	0	1	0	0	0	0	0	0	0	0	0
210020	24	7	26.67	0	0	1	0	0	0	0	0	1	0	0	0	0	0	0	0	0	0
210033	27	9	26.04	0	0	1	0	1	0	0	0	1	0	0	0	1	0	0	0	0	0
208952	32	10	22.96	0	0	1	0	0	0	0	0	1	0	0	0	0	0	0	0	0	0
209638	28	5	22.89	0	1	1	0	1	0	0	0	1	0	0	0	0	0	0	0	0	0
209665	27	9	27.47	0	0	1	0	1	0	0	0	1	0	0	0	0	0	0	0	0	1
210240	38	19	28.84	0	0	1	0	1	0	0	0	1	0	1	0	0	0	0	0	0	1
209388	29	2	22.72	0	0	1	0	1	0	0	0	1	0	0	0	1	0	0	0	0	0
210309	35	2	22.83	0	0	1	0	0	0	0	0	1	0	0	0	0	0	0	0	0	0
209193	32	2	19.98	0	0	1	0	1	0	0	0	1	0	0	0	0	0	0	0	1	0
210334	34	10	26.56	0	0	1	0	0	0	0	0	1	0	0	0	1	0	0	0	0	0
234876	35	11	26.56	0	0	1	0	0	0	0	0	1	0	0	0	1	0	0	0	0	0
271970	35	11	26.56	0	0	1	0	0	0	0	0	1	0	0	0	1	0	0	0	0	0
209918	26	3	16.44	0	0	1	0	1	0	0	0	1	0	0	0	0	0	0	0	0	1
209223	30	4	24.34	0	0	1	0	1	0	0	0	1	0	0	0	1	0	0	0	0	0
210438	28	3	20.94	0	0	1	0	0	0	0	0	1	0	0	0	1	0	0	0	0	1
209726	27	4	20.32	0	0	1	0	0	0	0	0	1	0	0	0	0	0	0	0	0	0
210473	31	6	21.36	0	0	1	0	1	0	0	0	1	0	0	0	1	0	0	0	0	1
209123	28	5	25.33	0	0	1	0	1	0	0	0	1	0	0	0	1	0	0	0	0	0
209841	31	3	25.41	0	1	1	0	1	0	0	0	1	0	0	0	0	0	0	0	0	0
210241	31	3	22.83	0	1	1	1	1	0	0	0	1	0	0	0	0	0	0	0	0	1
210491	39	4	27.84	1	1	1	1	0	0	0	1	1	0	0	0	1	0	0	0	0	0
210846	32	8	26.38	0	0	1	0	1	0	0	0	1	0	0	0	1	0	0	0	0	0
209084	26	2	23.83	0	0	1	0	0	0	0	0	1	0	0	0	1	0	0	0	0	0
210920	34	2	29.24	0	0	1	0	0	0	0	0	1	0	0	0	0	0	0	0	0	0
209724	40	4	21.08	0	1	1	0	1	0	0	0	1	0	0	0	1	0	0	0	0	0
210428	36	2	21.2	0	0	1	0	1	0	0	0	1	0	0	0	0	0	0	0	0	0
210966	35	8	21.67	0	0	1	0	1	0	0	0	1	0	0	0	0	0	0	0	0	0
213380	35	8	21.67	0	0	1	0	1	0	0	0	1	0	0	0	0	0	0	0	0	0
209765	28	3	28.23	0	0	1	0	1	0	0	0	1	0	0	0	0	0	0	0	0	0
208116	37	9	30.36	0	0	1	0	1	0	0	0	1	0	0	0	0	0	0	0	0	0
210486	26	0.9	21.61	0	0	0	0	1	0	0	1	1	0	0	0	1	0	0	0	0	1
211056	34	6	25.72	0	0	1	0	0	0	0	0	1	0	0	0	0	0	1	0	0	0
210124	31	7	31.63	0	0	1	0	0	0	0	0	1	0	0	0	1	0	0	0	0	0
216187	31	8	31.63	0	0	1	0	0	0	0	0	1	0	0	0	1	0	0	0	0	0
211102	25	2	16.65	0	0	1	0	1	0	0	0	1	0	0	0	1	0	0	0	0	0
209108	27	3	25.4	0	0	1	0	0	0	0	0	1	0	0	0	0	0	0	0	0	0
211141	24	5	31.65	0	0	1	0	1	0	0	0	1	0	0	0	0	0	0	0	0	0
210025	28	1	27.3	0	0	1	0	1	0	0	0	1	0	0	0	0	0	0	0	0	0
210670	31	1.3	27.06	0	0	1	1	1	0	0	0	1	0	0	0	1	0	0	0	0	0
211184	35	2	20.72	0	0	1	0	1	0	0	0	1	0	0	0	0	0	0	0	0	0
209748	42	5	29.64	0	1	1	0	1	0	0	0	1	0	0	0	0	0	0	0	0	0
210543	36	9	20.81	0	0	1	0	1	0	0	0	1	0	0	0	0	0	1	0	0	0
208950	36	7	28.86	0	0	1	0	1	0	0	0	1	0	0	0	0	0	0	0	0	1
210903	35	4	24.03	0	0	1	1	1	0	0	0	1	0	0	0	0	0	0	0	0	0
214150	36	4	24.03	0	0	1	1	1	0	0	0	1	0	0	0	0	0	0	0	0	0
211233	32	5	27.78	0	0	1	0	1	0	0	0	1	0	1	0	1	0	0	0	0	0
211067	35	1	21.93	0	1	1	0	1	0	0	0	1	0	1	0	0	0	0	0	0	0
211200	33	2	23.83	0	0	1	0	1	0	0	0	1	0	0	0	1	0	0	0	0	0
209427	32	2	22.27	0	0	1	0	1	0	0	0	1	0	0	0	0	0	0	0	0	1
211327	34	11	24.3	0	0	1	1	0	0	0	0	1	0	0	0	0	0	0	0	0	0
208765	31	0.5	22.43	0	1	0	0	1	0	0	0	1	0	0	0	0	0	0	0	0	0
211401	31	5	22.68	0	0	1	1	1	0	0	0	1	0	0	0	0	0	0	0	0	0
209641	30	2	23.31	0	1	1	0	1	0	0	0	1	0	0	0	0	0	0	0	0	0
211528	27	2	22.66	0	0	1	1	1	0	0	0	1	0	0	0	0	0	0	0	0	1
211545	29	4	20.7	0	0	1	0	0	0	0	0	1	0	0	0	0	0	0	0	0	0
209270	33	6	19.95	0	0	1	0	1	0	0	0	1	0	1	0	0	0	0	1	0	0
211704	25	4	20.2	0	0	1	0	1	0	0	0	1	0	0	0	0	0	0	0	0	1
209230	31	9	25.76	0	0	1	0	1	0	0	0	1	0	0	0	0	0	0	0	0	0
214606	31	9	25.76	0	0	1	0	1	0	0	0	1	0	0	0	0	0	0	0	0	0
211712	33	7	21.1	0	0	1	0	1	0	0	0	1	0	0	0	1	0	0	0	0	0
211774	29	3	22.04	0	1	1	0	1	0	0	0	1	0	0	0	0	0	0	0	0	0
211775	35	9	22.72	0	0	1	0	1	0	0	0	1	0	0	0	0	0	0	0	0	0
211776	31	4	23.14	0	1	1	0	1	0	0	1	1	0	0	0	1	0	0	0	0	0
209542	36	6	26.4	0	0	1	0	1	0	0	0	1	0	0	0	0	0	0	0	0	0
211808	35	8	24.95	0	0	1	1	1	0	0	0	1	0	0	0	0	0	0	0	0	0
211825	35	8	20.87	0	0	1	0	0	0	0	0	1	0	0	0	1	0	0	0	0	0
211874	32	0.2	24.22	0	0	0	0	1	0	0	0	1	0	0	0	1	0	0	0	0	0
210390	34	3	18.99	0	0	1	0	1	0	0	0	1	0	0	0	1	0	0	0	0	0
211371	29	4	27.06	0	0	1	0	1	0	0	0	1	0	0	0	0	0	0	0	0	0
211946	29	2	20.83	0	0	1	0	1	0	0	1	1	0	0	0	1	0	0	0	0	1
210228	30	2	19.31	0	0	1	0	0	0	0	0	1	0	0	0	1	0	0	0	0	0
210072	28	6	28.6	0	1	1	0	1	0	0	1	1	0	0	0	0	0	0	0	0	1
212105	34	3	23.63	0	0	1	0	1	0	0	0	1	0	1	0	0	0	0	0	0	0
212126	30	6	26.84	0	1	1	0	0	0	0	0	1	0	0	0	0	0	0	0	0	0
212037	33	1	21.09	0	0	1	0	0	0	0	0	1	0	1	0	0	0	0	0	0	0
212154	36	1	24.97	0	0	1	0	1	0	0	0	1	0	0	0	0	0	0	0	0	0
211068	33	0.9	20.44	0	0	0	1	1	0	0	0	1	0	1	0	0	0	0	0	0	0
211600	35	2	24.03	0	0	1	1	1	0	0	0	1	0	0	0	0	0	0	0	0	0
212226	30	6	19.56	0	0	1	0	1	0	0	0	1	0	0	0	0	0	0	0	0	0
212238	25	4	19.02	0	0	1	0	1	0	0	0	1	0	0	0	0	0	0	0	0	0
211685	27	8	30.04	0	0	1	0	0	0	0	0	1	0	0	0	0	0	0	0	0	0
211133	38	3	25.92	0	0	1	0	0	0	0	0	1	0	1	0	0	0	0	0	0	0
211272	34	14	20.58	0	0	1	0	0	0	0	0	1	0	0	0	1	0	0	0	0	0
212297	25	0.1	30.33	0	0	0	0	1	0	0	0	1	0	0	0	1	0	0	0	0	1
211506	25	1.5	26.63	0	0	1	0	1	0	0	0	1	0	0	0	0	0	0	0	0	0
211360	32	4	29.72	0	0	1	0	1	0	0	0	1	0	0	0	0	0	0	0	0	0
212376	25	3	25.33	0	0	1	0	0	0	0	0	1	0	0	0	0	0	0	0	0	1
212443	29	4	21.03	0	0	1	0	1	0	0	0	1	0	0	0	1	0	0	0	0	0
210811	36	11	25.6	0	0	1	0	1	0	0	0	1	0	0	0	1	0	0	0	0	0
212044	33	4	26.84	0	0	1	0	1	0	0	0	1	0	0	0	0	0	0	0	0	0
212324	28	4	28.91	0	0	1	0	1	0	0	0	1	0	0	0	0	0	0	0	0	0
212597	34	12	25.96	0	0	1	0	0	0	0	0	1	0	0	0	0	0	0	0	0	0
212617	35	4	24.46	0	0	1	0	0	0	0	0	1	0	0	0	0	0	0	0	0	0
219075	36	5	24.46	0	0	1	0	0	0	0	0	1	0	0	0	0	0	0	0	0	0
210675	28	7	26.67	0	0	1	0	0	0	0	0	1	0	0	0	0	0	0	0	0	1
211010	33	1	21.88	0	0	1	0	1	0	0	0	1	0	0	0	0	0	0	0	0	0
211237	28	6	24.09	0	0	1	0	0	0	0	0	1	0	0	0	0	0	0	0	0	0
217428	28	4	24.09	0	0	1	0	0	0	0	0	1	0	0	0	0	0	0	0	0	0
212290	29	1.9	19.2	0	0	1	0	0	0	0	0	1	0	0	0	1	0	0	0	0	0
212766	25	3	20.4	0	0	1	0	0	0	0	0	1	0	0	0	0	0	0	0	0	0
211941	30	4	19.22	0	0	1	1	1	0	0	0	1	0	0	0	0	0	0	0	0	0
211938	35	3	26.04	0	0	1	1	1	0	0	0	1	0	0	0	0	0	0	0	0	0
212932	24	4	24.12	0	1	1	0	1	0	0	0	1	0	0	0	1	0	0	0	0	1
212942	28	2	28.04	0	0	1	0	1	0	0	1	1	0	0	0	0	0	0	0	0	0
211751	31	10	26.67	1	0	1	0	1	0	0	0	1	0	0	0	0	0	0	0	0	0
212402	26	3	18.67	0	1	1	0	1	0	0	0	1	0	1	0	0	0	0	0	0	0
212986	31	3	27.18	0	0	1	0	0	0	0	1	1	0	0	0	1	0	0	0	0	1
209864	25	9	21.23	0	0	1	0	0	0	0	0	1	0	0	0	0	0	0	0	0	0
210077	30	4	21.72	0	0	1	0	0	0	0	1	1	0	0	0	0	0	0	0	0	0
212254	32	10	25.11	0	0	1	0	1	0	0	0	1	0	0	0	0	0	0	0	0	1
212529	41	3	27.01	0	0	1	0	1	0	0	0	1	0	1	0	0	0	0	0	0	1
213088	27	9	29.3	0	0	1	0	1	0	0	0	1	0	0	0	0	0	0	0	0	1
213110	34	4	24.84	0	0	1	0	1	0	0	1	1	0	0	0	1	0	0	0	0	0
246397	35	5	24.84	0	0	1	0	1	0	0	1	1	0	0	0	1	0	0	0	0	0
213109	34	1	22.85	0	0	1	1	1	0	0	0	1	0	1	0	1	0	0	0	0	0
212948	30	4	25.78	0	0	1	0	1	0	0	0	1	0	0	0	0	0	0	0	0	0
209634	24	4	25.63	0	0	1	0	1	0	0	0	1	0	0	0	0	0	0	0	0	0
213265	29	1	21.67	0	0	1	1	0	0	0	0	1	0	0	0	0	0	0	0	0	0
210250	30	4	17.12	0	0	1	0	1	0	0	0	1	0	0	0	0	0	0	0	0	0
212052	24	5	16.77	0	0	1	0	1	0	0	0	1	0	0	0	0	0	0	0	0	0
213077	30	5	21.45	0	0	1	0	1	0	0	0	1	0	0	0	0	0	0	0	0	0
215642	29	5	24.92	0	0	1	0	1	0	0	0	1	0	0	0	0	0	0	0	0	0
213555	26	8	27.85	0	0	1	0	1	0	0	0	1	0	0	0	1	0	0	0	0	0
213557	36	6	20.43	0	0	1	0	1	0	0	0	1	0	0	0	0	0	0	0	0	0
207449	39	10	22.89	0	0	1	0	1	0	0	0	1	0	0	0	0	0	0	0	0	1
212572	37	3	18.36	0	0	1	0	0	0	0	0	1	0	0	0	0	0	0	0	0	0
213593	28	2	20.96	0	0	1	0	0	0	0	0	1	0	0	0	0	0	0	0	0	0
211412	23	1	22.03	0	0	1	0	1	0	0	0	1	0	0	0	0	0	0	0	0	0
246439	31	0.3	23.5	0	0	0	0	1	0	0	0	1	0	0	0	0	0	0	0	0	0
208564	34	6	24.13	0	0	1	0	1	0	0	0	1	0	0	0	1	0	0	0	0	0
212959	32	3	19.53	0	0	1	0	0	0	0	0	1	0	0	0	0	0	0	0	0	0
212001	34	15	27.06	0	0	1	1	1	0	0	0	1	0	0	0	0	0	0	0	0	1
213679	33	1	23.92	0	0	1	1	1	0	0	0	1	0	0	0	0	0	0	0	0	0
212708	32	8	23.44	0	0	1	0	1	0	0	0	1	0	0	0	0	0	0	0	0	0
213306	40	4	22.46	0	0	1	0	1	0	0	0	1	0	0	0	1	0	0	0	0	0
212676	33	3	22.94	0	0	1	0	1	0	0	0	1	0	0	0	0	0	0	0	0	0
213581	28	6	21.08	0	0	1	0	1	0	0	0	1	0	0	0	1	0	0	0	0	0
213868	31	6	21.48	0	0	1	0	0	0	0	0	1	0	0	0	0	0	0	0	0	0
213204	30	2	24.89	0	1	1	0	0	0	0	0	1	0	0	0	0	0	0	0	0	0
220023	30	3	24.89	0	1	1	0	0	0	0	0	1	0	0	0	0	0	0	0	0	1
213277	22	6.5	16.03	0	0	1	0	1	0	0	0	1	0	0	0	1	0	0	0	0	0
213051	32	8	24.56	0	0	1	1	1	0	0	0	1	0	0	0	1	0	0	0	0	0
211703	29	9	22.66	0	0	1	0	1	0	1	0	1	0	0	0	1	0	0	0	0	0
214064	23	5	20.03	0	0	1	0	1	0	0	0	1	0	0	0	0	0	0	0	0	0
212068	36	10	24	0	0	1	0	1	0	0	0	1	0	0	0	0	0	0	0	0	0
213523	24	4	23.42	0	0	1	0	1	0	0	0	1	0	0	0	1	0	0	0	0	0
214419	32	2	27.34	0	0	1	0	1	0	0	0	1	0	0	0	0	0	0	0	0	1
213145	37	2	22.43	0	0	1	1	1	0	0	0	1	0	0	0	0	0	0	0	0	0
212698	34	6	29.3	0	0	1	0	1	0	0	0	1	0	1	0	0	0	0	0	0	0
213754	27	3	20.76	0	0	1	0	1	0	0	0	1	0	0	0	0	0	0	0	0	0
213280	33	12	25.51	0	0	1	0	1	0	0	0	1	0	0	0	1	0	0	0	0	0
211699	30	3	29.33	0	0	1	0	0	0	0	0	1	0	0	1	0	0	0	0	0	0
214210	35	2	22.89	0	0	1	0	0	0	0	0	1	0	0	0	0	0	0	0	0	0
214242	29	1	21.83	0	0	1	0	1	0	1	0	1	0	0	0	0	0	0	0	0	0
214858	36	10	24.34	0	0	1	1	1	0	1	0	1	0	0	0	0	0	1	0	0	0
212462	26	0.4	21.23	0	0	0	0	1	0	0	0	1	0	0	0	1	0	0	0	0	0
214882	31	1	20.4	0	1	1	0	1	0	0	0	1	0	0	0	0	0	0	0	0	0
214910	30	6	25.39	0	1	1	0	0	0	0	0	1	0	0	0	0	0	0	0	0	0
214033	39	5	26.67	0	0	1	0	0	0	0	0	1	0	1	0	0	0	0	0	0	0
213260	32	1.6	19.01	0	1	1	0	0	0	0	0	1	0	0	0	0	0	0	0	0	0
214999	30	1	26.56	0	1	1	1	0	0	0	0	1	0	0	0	0	0	0	0	0	0
214240	29	2	27.64	0	0	1	0	1	0	0	0	1	0	0	0	0	0	0	0	0	1
214408	24	3	21.45	0	0	1	0	1	0	0	0	1	0	0	0	1	0	0	0	0	1
214247	28	4	22.66	0	0	1	0	0	0	0	0	1	0	0	0	0	0	0	0	0	0
222539	28	6	22.66	0	0	1	0	0	0	0	0	1	0	0	0	0	0	0	0	0	0
215169	38	12	28.04	0	0	1	0	1	0	0	0	1	0	0	0	1	0	0	0	0	0
214961	29	0.6	21.05	0	0	0	0	1	0	0	0	1	0	0	0	0	0	0	0	0	0
214307	29	6	17.8	0	1	1	0	1	0	0	0	1	0	0	0	0	0	0	0	0	0
215401	35	3	19.23	0	1	1	0	1	0	0	1	1	0	0	0	1	0	0	0	0	1
215598	31	3.9	21.63	0	0	1	0	1	0	0	1	1	0	0	0	1	0	0	0	0	0
215759	34	10	29.67	0	0	1	1	1	0	0	0	1	0	0	0	0	0	0	0	0	0
215785	31	9	20.83	0	0	1	0	1	0	0	0	1	0	0	0	0	0	0	0	0	0
215810	27	2	19.35	0	0	1	0	1	0	0	0	1	0	0	0	0	0	0	0	0	0
211788	35	8	28.75	0	0	1	0	1	0	0	0	1	0	0	0	0	0	0	0	0	0
215326	36	2	25.63	0	0	1	0	1	0	0	0	1	0	0	0	0	0	0	0	0	0
215840	25	2.9	24.44	0	0	1	0	0	0	0	0	1	0	0	0	0	0	0	0	0	1
215890	30	4	20.7	0	1	1	0	0	0	0	0	1	0	0	0	0	0	0	0	0	0
215918	24	1.2	20.5	0	0	1	0	1	0	0	0	1	0	0	0	0	0	0	0	0	0
215915	34	5	20.94	0	0	1	0	1	0	0	0	1	0	0	0	0	0	1	0	0	0
215920	35	9	24.44	0	0	1	1	1	0	0	1	1	0	0	0	1	0	0	0	0	0
221506	36	9	24.44	0	0	1	1	1	0	0	1	1	0	0	0	1	0	0	0	0	0
215972	30	1.8	22.22	0	0	1	0	1	0	0	1	1	0	0	0	1	0	0	0	0	1
215671	29	3.5	23.14	0	0	1	1	0	0	0	0	1	0	0	0	0	0	0	0	0	0
212917	22	2	23.11	0	1	1	0	0	0	0	0	1	0	0	0	0	0	1	0	0	0
214955	29	2	25.6	0	1	1	0	1	0	1	0	1	0	0	0	0	0	0	0	0	0
214590	29	4	27.77	0	0	1	0	1	0	0	0	1	0	0	0	0	0	0	0	0	0
213246	30	5	26.56	0	0	1	0	1	0	0	0	1	0	0	0	1	0	0	0	0	1
215881	36	3	27.41	0	0	1	0	1	0	0	0	1	0	0	0	0	0	0	0	0	0
215143	35	2	29.72	0	0	1	0	0	0	0	1	1	0	0	0	1	0	0	0	0	0
215219	39	17	22.72	0	0	1	0	0	0	0	0	1	0	0	0	0	0	0	0	0	0
218641	39	18	22.72	0	0	1	0	1	0	0	0	1	0	0	0	0	0	0	0	0	0
243025	39	18	22.72	0	0	1	0	1	0	0	0	1	0	0	0	0	0	0	0	0	0
213162	38	2	28.4	0	0	1	1	1	0	0	0	1	0	0	0	0	0	1	0	0	0
207277	27	9	32.05	0	0	1	0	1	0	1	0	0	0	1	1	0	0	0	0	0	1
204626	28	1	25.63	0	0	1	0	0	0	0	0	1	0	0	0	1	0	0	0	0	1
216360	37	10	24.03	0	0	1	0	1	0	0	0	1	0	0	0	0	0	0	0	0	0
206190	27	2	20.9	0	0	1	1	1	0	0	0	1	0	0	0	0	0	0	0	0	0
216244	46	4	26.5	0	0	1	1	0	0	0	0	1	0	0	0	0	0	0	0	0	0
215718	28	7	22.15	0	1	1	1	1	0	0	0	1	0	0	0	0	0	0	0	0	0
216499	28	4	22.21	0	1	1	0	0	0	1	0	1	0	0	0	0	0	0	0	0	0
215847	23	3	18.37	0	0	1	0	1	0	0	1	1	0	0	0	0	0	0	0	0	0
216606	36	7	27.47	0	1	1	0	1	0	0	0	1	0	0	0	1	0	0	0	0	0
216617	28	1	24.14	0	0	1	0	1	0	0	0	1	0	0	0	0	0	1	0	0	0
216792	30	3	33.33	0	0	1	1	0	0	0	0	1	0	0	0	0	0	0	0	0	1
216208	29	2.5	27.06	0	0	1	0	1	0	0	0	1	0	0	0	0	0	0	0	0	0
216297	35	6	22.6	0	0	1	0	1	0	0	0	1	0	0	0	0	0	0	0	0	0
215388	37	11	27.24	0	0	1	0	1	0	0	0	1	0	0	0	0	0	0	0	0	0
212994	32	12	26.04	0	0	1	0	0	0	0	0	1	0	0	0	0	0	0	0	0	1
217023	32	1.5	27.78	0	0	1	0	0	0	0	0	1	0	0	0	0	0	0	0	0	0
216089	36	4	23.33	0	1	1	0	0	0	1	0	1	0	0	0	0	0	1	0	0	0
217048	27	3	24.44	0	0	1	0	1	0	0	0	1	0	0	0	0	0	0	0	0	0
217060	31	2	24.84	0	0	1	0	1	0	0	0	1	0	0	0	1	0	0	0	0	0
216667	36	2	22.21	0	0	1	0	1	0	0	0	1	0	0	0	0	0	0	0	0	1
216581	27	3	22.51	0	1	1	0	1	0	0	0	1	0	0	0	0	0	0	0	0	0
217148	34	0.5	26.56	0	1	0	1	1	0	0	0	1	0	0	0	0	0	0	0	0	0
216833	39	0.3	25	0	0	0	0	1	0	0	0	1	0	0	0	0	0	0	0	1	0
217273	26	0.5	21.19	0	1	0	0	1	0	0	0	1	0	0	0	0	0	0	0	0	0
217281	22	0.5	24.52	0	0	0	0	0	0	0	0	1	0	0	0	1	0	0	0	0	0
216656	33	1	20.7	0	0	1	0	1	0	0	0	1	0	1	0	1	0	0	0	0	0
217287	37	14	25.39	0	0	1	1	1	0	0	0	1	0	0	0	0	0	0	0	0	0
213758	43	2	21.93	0	1	1	1	1	0	1	0	1	0	0	0	0	0	0	0	0	0
216649	33	11	24.03	0	0	1	0	1	0	0	0	1	0	0	0	1	0	0	0	0	0
216795	27	0.9	23.23	0	0	0	0	1	0	0	0	1	0	0	0	0	0	0	0	0	1
215717	28	1	20.07	0	0	1	0	0	0	0	0	1	0	0	0	0	0	0	0	0	0
215953	38	1	23.44	0	1	1	0	0	0	0	0	1	0	1	0	0	0	0	0	0	0
217571	30	6.5	26.64	0	0	1	0	1	0	0	1	1	0	0	0	1	0	0	0	0	0
217499	30	3	21.36	0	0	1	0	1	0	0	0	1	0	0	0	0	0	0	0	0	0
217688	34	3	21.37	0	0	1	0	1	0	0	0	1	0	0	0	0	0	0	0	0	0
216647	30	3.9	24.14	0	0	1	0	1	0	0	0	1	0	0	0	0	0	0	0	0	0
217823	27	0.3	20.31	0	1	0	0	1	0	0	1	1	0	0	0	1	0	0	0	0	0
216517	29	1.9	21.41	0	0	1	0	1	0	0	0	1	0	0	0	1	0	0	0	0	0
217859	34	9	28.98	0	0	1	0	1	0	0	0	1	0	1	0	1	0	0	0	0	0
217872	34	7	28.89	0	0	1	0	1	0	0	0	1	0	1	0	1	0	0	0	0	0
217094	31	4	26.9	0	1	1	1	0	0	0	0	1	0	1	0	0	0	0	0	0	0
217915	29	8	20.2	0	0	1	0	1	0	0	0	1	0	0	0	0	0	0	0	0	0
214228	26	5	23.78	0	0	1	0	0	0	0	0	1	0	0	0	1	0	0	0	0	0
258346	27	0.4	23.78	0	0	0	0	0	0	0	0	1	0	0	0	1	0	0	0	0	0
214422	34	6	30.22	0	0	1	1	1	0	1	1	1	0	0	0	0	0	0	0	0	0
216681	26	6	18.37	0	0	1	0	1	0	0	0	1	0	0	0	0	0	0	0	0	0
217057	35	12	21.36	0	0	1	0	0	0	0	0	1	0	1	0	1	0	0	0	0	1
218110	36	2	24.61	0	0	1	0	0	0	0	0	1	0	0	0	0	0	0	0	0	0
218084	26	4	24.03	0	0	1	0	0	0	0	0	1	0	0	0	0	0	0	0	0	1
218288	28	3	18.77	0	0	1	0	1	0	0	0	1	0	0	0	0	0	0	0	0	0
215644	29	5	22.66	0	1	1	0	1	0	0	0	1	0	0	0	0	0	0	0	0	1
215346	30	2.8	26.37	0	0	1	0	1	0	0	0	1	0	0	0	0	0	0	0	0	0
216054	30	8	21.21	0	0	1	0	1	0	1	0	1	0	0	0	0	0	0	0	0	0
217728	33	5	18.73	0	0	1	0	0	0	0	0	1	0	0	0	0	0	0	0	0	0
217356	28	0.3	24.44	0	0	0	0	1	0	0	0	1	0	0	0	0	0	0	0	0	1
215875	25	2	31.18	0	1	1	0	1	0	0	0	1	0	0	0	1	0	0	0	0	0
217257	27	2	21.12	0	0	1	0	0	0	0	0	1	0	0	0	0	0	0	0	0	0
218333	33	4	25.48	0	0	1	0	1	0	0	0	1	0	0	0	0	0	0	0	0	0
217933	30	3	19.22	0	0	1	0	0	0	0	0	1	0	0	0	0	0	0	0	0	0
217263	31	7	24.28	0	0	1	0	1	0	0	0	1	0	0	0	0	0	0	0	0	0
216887	30	1.5	24.98	0	0	1	0	1	0	0	0	1	0	0	0	0	0	0	0	0	0
232865	30	1.8	24.98	0	0	1	0	1	0	0	0	1	0	0	0	0	0	0	0	0	0
217809	31	1	20.96	0	0	1	1	1	0	0	0	1	0	0	0	0	0	0	0	0	0
216589	29	5	26.04	0	0	1	0	1	0	0	1	1	0	0	0	0	0	0	0	0	0
218412	33	1.2	19.22	0	0	1	0	0	0	1	0	1	0	0	0	1	0	0	0	0	0
215904	31	2.1	23.11	0	1	1	0	0	0	0	0	1	0	0	0	0	0	0	0	0	0
217949	32	1	26.84	0	0	1	1	1	0	0	0	1	0	0	0	0	0	0	0	0	0
217228	29	9	24	0	0	1	0	1	0	0	0	1	0	0	0	1	0	0	0	0	0
272934	30	9	24	0	0	1	0	1	0	0	0	1	0	0	0	1	0	0	0	0	0
218626	25	4	26.43	0	0	1	0	0	0	0	0	1	0	0	0	0	0	0	0	0	0
218692	29	1	19.63	0	0	1	1	0	0	0	0	1	0	0	0	0	0	0	0	0	0
216618	21	3	26.67	0	0	1	1	1	0	0	1	1	0	0	0	1	0	0	0	0	0
215832	36	4	27.06	0	1	1	0	1	0	0	0	1	0	0	0	1	0	0	0	0	1
218789	28	4	27.34	0	0	1	0	1	0	1	0	1	0	0	0	0	0	0	0	0	0
218854	34	3	19.38	0	0	1	0	1	0	0	0	1	0	0	0	0	0	0	0	0	0
218824	28	6	24.03	0	0	1	0	1	0	0	0	1	0	0	0	0	0	0	0	0	0
217708	32	2	21.99	0	0	1	0	0	0	0	0	1	0	0	0	0	0	0	0	0	0
218899	27	7	25.39	0	0	1	0	1	0	0	0	1	0	0	0	1	0	0	0	0	0
218993	34	5	26.56	1	0	1	0	1	0	0	0	0	0	0	1	1	0	0	0	0	1
217559	34	3.1	19.98	0	0	1	0	1	0	0	0	1	0	0	0	0	0	0	0	0	0
216977	23	5	21.91	0	0	1	0	1	0	0	0	1	0	0	0	0	0	0	0	0	0
218792	36	7	27.34	0	0	1	0	1	0	1	0	1	0	0	0	0	0	0	0	0	0
217134	35	1.56	22.15	0	0	1	0	0	0	0	0	1	0	0	0	0	0	0	0	0	0
218160	26	5	20.81	0	1	1	0	1	0	0	0	1	0	0	0	1	0	0	0	0	0
217870	32	6	25.64	0	0	1	1	1	0	0	0	1	0	0	0	1	0	0	0	0	0
219164	30	2	25.39	0	0	1	0	1	0	0	0	1	0	0	0	0	0	0	0	0	0
256193	29	0.3	24.65	0	0	0	1	1	0	0	0	1	0	1	0	1	0	0	0	0	0
216601	28	1	25.53	0	0	1	1	0	0	0	0	1	0	0	0	0	0	0	0	0	0
219166	28	2	27.1	0	0	1	0	0	0	0	0	1	0	0	0	0	0	0	0	0	0
219173	32	1	24.24	0	0	1	0	1	0	0	0	1	0	0	0	0	0	0	0	0	0
217941	33	9	29.9	0	0	1	1	1	0	0	0	1	0	0	0	1	0	0	0	0	1
217623	25	3	22.31	0	0	1	0	1	0	0	0	1	0	0	0	0	0	0	0	0	0
218814	38	2	27.94	0	1	1	0	1	0	0	0	1	0	0	0	0	0	0	0	0	0
219321	31	3	19.65	0	0	1	0	1	0	0	0	1	0	0	0	1	0	0	0	0	0
219347	33	8	17.44	0	0	1	0	0	0	0	0	1	0	0	0	0	0	0	0	0	0
219350	30	5	21.43	0	1	1	0	0	0	0	0	1	0	0	0	0	0	0	0	0	0
216619	33	1	34.52	0	0	1	1	1	0	1	0	1	0	0	0	0	0	0	0	0	0
219372	30	3	17.94	0	0	1	0	1	0	0	0	1	0	0	0	0	0	0	0	0	0
218812	24	4	20.7	0	1	1	0	1	0	0	0	1	0	0	0	0	0	0	0	0	0
219427	24	5	28.04	0	0	1	0	1	0	0	0	1	0	0	0	0	0	0	0	0	0
216904	26	1.7	19.29	0	0	1	0	0	0	0	0	1	0	0	0	0	0	0	0	0	0
218822	24	2	19.33	0	0	1	0	1	0	0	0	1	0	0	0	0	0	0	0	0	0
218268	27	2	20.93	0	0	1	0	1	0	0	1	1	0	0	0	0	0	0	0	0	0
218254	29	2.5	21.8	0	0	1	0	0	0	0	0	1	0	0	0	0	0	0	0	0	1
218939	27	3	22.89	0	0	1	0	0	0	0	0	1	0	0	0	0	0	0	0	0	0
219032	39	7	24.03	0	1	1	0	1	0	0	0	1	0	0	0	0	0	0	0	0	0
219008	24	1	25.39	0	0	1	0	1	0	0	0	1	0	0	0	0	0	0	0	0	0
218505	29	4.1	16.73	0	0	1	0	1	0	0	0	1	0	0	0	0	0	0	0	0	0
219671	34	4	23.05	0	0	1	0	0	0	0	0	1	0	0	0	0	0	0	0	0	0
215061	34	9	29.52	0	0	1	0	1	0	0	1	1	0	0	0	0	0	0	0	0	0
218819	27	4	25.04	0	0	1	1	1	0	0	1	1	0	1	0	0	0	0	0	0	0
219590	38	10	29.44	0	0	1	0	1	0	0	0	1	0	0	0	0	0	0	0	0	0
219747	36	11	17.85	0	0	1	1	1	0	0	0	1	0	0	0	0	0	0	0	0	0
219741	37	11	26.91	0	0	1	0	1	0	0	0	1	0	0	0	1	0	0	0	0	0
219726	35	14	23.4	0	0	1	0	0	0	0	0	1	0	0	0	1	0	0	0	0	0
218571	31	2	18.44	0	1	1	0	1	0	0	0	1	0	0	0	0	0	0	0	0	0
219535	34	4	24.03	0	0	1	0	0	0	0	0	1	0	0	0	0	0	0	0	0	0
218817	22	4	32.46	0	1	1	0	1	0	0	0	1	0	0	0	1	0	1	0	0	1
219758	29	2	20.51	0	1	1	0	1	0	0	0	1	0	0	0	0	0	0	0	0	0
219126	36	3.5	24.46	0	0	1	0	1	0	1	0	1	0	0	0	0	0	0	0	0	1
219798	28	5	29.97	0	0	1	0	1	0	0	0	1	0	0	0	1	0	0	0	0	0
217718	41	9	28.04	0	0	1	0	1	0	0	0	1	0	1	0	0	0	0	0	0	0
218576	33	4	20.81	0	0	1	0	1	0	0	0	1	0	1	0	0	0	0	0	0	0
219850	35	11	27.47	0	0	1	0	1	0	0	0	1	0	1	0	0	0	0	0	0	0
219127	31	1	22.35	0	0	1	0	1	0	1	0	1	0	0	0	0	0	0	0	0	0
218804	32	2.8	26.64	0	0	1	1	0	0	0	0	1	0	0	0	0	0	0	0	0	0
219872	38	1.8	24.14	0	0	1	0	0	0	0	0	0	0	1	1	0	0	0	0	0	0
218447	26	2	20.24	0	0	1	0	1	0	0	0	1	0	0	0	0	0	0	0	0	0
219123	34	0.2	21.37	0	1	0	0	1	0	0	1	1	0	0	0	1	0	0	0	0	1
218929	32	5	25.63	0	1	1	0	1	0	0	0	1	0	0	0	0	0	0	0	0	0
219226	25	1.4	29.37	0	0	1	0	1	0	0	0	1	0	0	0	1	0	0	0	0	0
218384	27	0.1	19.05	0	0	0	0	1	0	0	0	1	0	0	0	0	0	0	0	0	0
218628	32	6.8	23.83	0	0	1	0	1	0	0	0	1	0	0	0	0	0	0	0	0	0
220019	32	5	20.28	0	0	1	0	1	0	0	0	1	0	0	0	0	0	0	0	0	0
220018	26	6	26.84	0	0	1	0	1	0	1	0	1	0	0	0	1	0	0	0	0	0
220130	31	4	22.99	0	0	1	0	0	0	0	0	1	0	0	0	1	0	0	0	0	0
220098	31	4	22.06	0	1	1	0	1	0	0	0	1	0	0	0	0	0	0	0	0	0
219756	36	1.4	23.12	0	0	1	0	1	0	0	0	1	0	0	0	0	0	0	0	0	0
220108	25	4	24.77	0	1	1	0	1	0	0	0	1	0	0	0	1	0	0	0	0	0
218827	26	1	21.23	0	1	1	0	1	0	0	0	1	0	0	0	1	0	0	0	0	0
220125	31	4	24.14	0	1	1	0	0	0	0	0	1	0	0	0	0	0	0	0	0	0
219358	35	6	26.48	0	0	1	0	1	0	0	0	1	0	0	0	0	0	0	0	0	0
217652	26	4	26.14	0	0	1	0	0	0	0	0	1	0	0	0	0	0	1	0	0	0
220087	25	4.5	23.93	0	0	1	0	1	0	0	0	1	0	0	0	0	0	0	0	0	0
218358	38	5	27.89	0	1	1	0	1	0	0	0	1	0	0	0	0	0	0	0	0	0
220266	34	4	24.89	0	0	1	0	1	0	0	0	1	0	0	0	0	0	0	0	0	0
218866	25	2	20.89	0	0	1	0	1	0	0	0	1	0	0	0	0	0	0	1	0	0
220302	32	0.8	19.72	0	0	0	1	1	0	0	0	1	0	1	0	0	0	0	0	0	0
220193	36	1.5	20.12	0	0	1	1	1	0	0	0	1	0	0	0	0	0	0	0	0	0
220355	31	2.9	22.6	0	0	1	0	1	0	0	0	1	0	0	0	0	0	0	0	0	0
273278	32	2.9	22.6	0	0	1	0	1	0	0	0	1	0	0	0	0	0	0	0	0	0
218924	38	1	25.91	0	0	1	0	1	0	0	0	1	0	0	0	0	0	0	0	0	0
220512	26	6	26.84	0	1	1	0	1	0	0	1	0	0	0	0	0	0	0	0	0	0
220506	33	5	20.17	0	1	1	0	0	0	0	0	1	0	0	0	0	0	0	0	0	0
220519	36	0.8	26.94	0	0	0	1	0	0	0	0	1	0	0	0	0	0	0	0	0	0
239310	36	1	26.94	0	0	1	1	0	0	0	0	1	0	0	0	0	0	0	0	0	0
219174	32	2	16.41	0	0	1	1	1	0	0	0	1	0	0	0	1	0	0	0	0	0
220327	34	0.8	21.85	0	0	0	1	0	0	0	0	1	0	0	0	0	0	0	0	0	0
220725	30	4	25	0	0	1	0	0	0	1	0	1	0	0	0	0	0	0	1	0	0
220720	26	2	22.66	0	1	1	0	1	0	0	0	1	0	0	0	0	0	0	0	0	0
220739	27	5.5	17.26	0	1	1	0	1	0	0	1	1	0	1	0	0	0	0	0	0	0
219509	24	0.7	27.01	0	0	0	0	0	0	0	0	0	0	0	0	0	0	0	0	0	0
220911	38	7	33.3	0	0	1	0	1	0	0	0	1	0	0	0	0	0	0	0	0	0
219353	30	7	29.3	0	0	1	0	1	0	0	0	1	0	0	0	0	0	0	0	0	0
219902	36	1.5	25.39	0	0	1	0	1	0	0	0	1	0	0	0	0	0	0	0	0	1
221031	34	4	21.09	0	0	1	0	1	0	0	0	1	0	0	0	0	0	0	0	0	0
220030	24	3	20.44	0	0	1	0	0	0	0	0	1	0	0	0	0	0	0	0	0	1
221069	35	5	27.44	0	0	1	0	1	0	0	0	1	0	0	0	0	0	1	0	0	0
220455	38	10	24.65	0	0	1	0	1	0	0	1	1	0	0	0	0	0	0	0	0	0
221092	31	1	20.89	0	0	1	1	1	0	0	1	1	0	0	0	0	0	0	0	0	0
218627	34	2	24.65	0	0	1	1	1	0	0	0	1	0	0	0	0	0	0	0	0	0
220696	21	2	25.45	0	0	1	0	1	0	0	0	1	0	0	0	0	0	0	0	0	0
219708	33	10	28.96	1	0	1	1	0	0	0	1	1	0	0	0	0	0	0	0	0	1
218855	41	8	28.41	0	0	1	0	1	0	0	0	1	0	1	0	0	0	0	0	0	0
260404	41	8	28.41	0	0	1	0	1	0	0	0	1	0	1	0	0	0	0	0	0	0
221250	35	3	24.46	0	0	1	0	0	0	0	1	1	0	0	0	1	0	0	0	0	0
220245	26	5	17.92	0	1	1	0	1	0	0	0	1	0	0	0	1	0	0	0	0	0
219175	37	13.4	27.94	1	0	1	0	0	0	0	0	1	0	0	0	0	0	0	0	0	0
221357	30	6	21.83	0	0	1	1	0	0	0	0	1	0	0	0	0	0	0	0	0	1
220044	35	5	21.85	0	0	1	0	1	0	0	0	1	0	0	0	1	0	0	0	0	1
219301	29	5	21.17	0	0	1	0	1	0	0	0	1	0	0	0	0	0	0	0	0	0
221472	34	3	23.05	0	0	1	0	0	0	0	0	1	0	0	0	0	0	0	0	0	0
219746	25	1.4	25.34	0	0	1	0	1	0	0	0	1	0	0	0	0	0	0	0	0	0
219159	25	7	27.18	0	0	1	0	1	0	0	0	1	0	0	0	0	0	0	0	0	0
221504	29	0.5	20.58	0	0	0	0	1	0	0	0	1	0	0	0	1	0	0	0	0	0
220155	33	5	28.89	0	0	1	0	1	0	1	0	1	0	0	0	0	0	0	0	0	0
220276	30	4	21.3	0	0	1	0	1	0	0	0	1	0	0	0	0	0	0	0	0	0
217028	31	4	21.1	0	0	1	1	1	0	0	0	1	0	1	0	0	0	0	0	0	1
221590	33	8	20.96	0	0	1	0	1	0	0	0	1	0	0	0	0	0	0	0	0	0
221159	33	9.5	18.83	0	0	1	1	0	0	0	0	1	0	0	0	0	0	0	0	0	0
221199	33	6	23.44	0	0	1	1	0	0	0	0	1	0	0	0	0	0	0	0	0	0
220822	27	4	20.57	0	0	1	0	0	0	0	0	1	0	0	1	0	0	0	0	0	0
221206	37	2	21.78	0	1	1	0	0	0	0	0	1	0	0	0	0	0	0	0	0	0
219642	31	9	23.14	0	0	1	0	1	0	0	0	1	0	0	0	0	0	1	0	0	0
220263	40	1	27.64	0	1	1	0	0	0	0	0	1	0	0	0	0	0	1	0	0	1
220583	30	0.5	18.73	0	0	0	0	1	0	0	0	1	0	0	0	0	0	0	0	0	0
214979	30	8	27.94	0	1	1	0	1	0	0	0	1	0	0	0	0	0	0	0	0	0
219168	32	9	27.1	0	0	1	0	1	0	0	0	1	0	0	0	0	0	0	0	0	0
215497	30	5	28.13	0	0	1	0	0	0	0	0	1	0	0	0	0	0	1	0	0	1
220401	27	3	20.5	0	0	1	0	1	0	0	1	1	0	0	0	1	0	0	0	0	0
222068	36	5	21.29	0	0	1	0	0	0	0	0	1	0	0	0	0	0	0	0	0	1
222083	27	10	24.97	0	0	1	1	1	0	0	0	1	0	0	0	1	0	0	0	0	0
222145	25	4	21.88	0	0	1	0	0	0	0	0	1	0	0	0	0	0	0	0	0	0
222167	29	6	28.76	0	0	1	0	0	0	0	0	1	0	0	0	1	0	1	0	0	0
222212	35	6	22.96	0	0	1	0	0	0	0	0	1	0	0	0	0	0	0	0	0	0
222218	26	3	24.03	0	1	1	0	0	0	0	0	1	0	0	0	1	0	0	0	0	0
221707	26	1	19.53	0	0	1	0	0	0	0	0	1	0	0	0	0	0	0	0	0	0
220407	33	2	27.24	0	0	1	0	1	0	0	0	1	0	1	0	0	0	0	0	0	0
221295	32	3	21.48	0	0	1	0	1	0	0	0	1	0	0	0	0	0	0	0	0	0
222368	32	10	29.52	0	0	1	0	0	0	0	0	1	0	0	0	0	0	0	0	0	0
222870	32	10	29.52	0	0	1	0	0	0	0	0	1	0	0	0	0	0	0	0	0	0
219455	34	5	23.15	0	0	1	0	1	0	0	0	1	0	0	0	0	0	0	0	0	0
221193	27	5	22.27	0	0	1	0	1	0	0	0	1	0	0	0	0	0	0	0	0	0
222511	27	4	24.77	0	0	1	0	0	0	0	0	0	0	0	1	0	0	0	0	0	0
263139	28	4	24.77	0	0	1	0	1	0	0	0	0	0	0	1	0	0	0	0	0	0
220170	34	4	20.81	0	0	1	0	1	0	0	0	1	0	0	0	0	0	0	0	0	0
222257	34	7	25.96	0	0	1	0	1	0	0	0	1	0	0	0	0	0	0	0	0	0
221116	36	5	28.01	0	0	1	1	1	0	0	0	1	0	0	0	0	0	0	0	0	0
222633	34	4	19.53	0	0	1	0	1	0	0	0	1	0	0	0	0	0	0	0	0	0
221461	21	1.5	21.63	0	1	1	0	1	0	1	0	1	0	0	0	1	0	0	0	0	0
221465	35	4	22.64	0	0	1	0	1	0	0	0	1	0	0	0	0	0	0	0	0	0
222721	37	3	23.19	0	0	1	1	1	0	0	0	1	0	0	0	0	0	0	0	0	0
220885	26	5	27.06	0	0	1	1	1	0	0	1	1	0	0	0	1	0	0	0	0	0
222769	31	3	33.54	0	0	1	0	1	0	0	0	1	0	0	0	0	0	1	0	0	0
222879	27	3	20.31	0	1	1	1	0	0	0	0	1	0	0	0	0	0	0	0	0	0
221365	44	2	20.89	0	0	1	0	0	0	0	0	1	0	0	0	0	0	0	0	0	1
225006	30	6	22.48	0	0	1	0	0	0	0	0	1	0	0	0	0	0	1	0	0	1
221634	32	10	19.95	0	1	1	0	1	0	0	0	1	0	0	0	0	0	0	0	0	0
217146	36	4	21.5	0	0	1	0	1	0	0	0	1	0	0	0	1	0	0	0	0	0
222875	29	1	19.87	0	0	1	0	0	0	0	0	1	0	0	0	0	0	0	0	0	0
224982	28	5	25	0	0	1	0	1	0	0	0	1	0	0	0	0	0	0	0	0	0
222739	31	6	30.86	0	0	1	1	1	0	0	0	1	0	0	0	1	0	1	0	0	0
232816	31	5	24.24	0	0	1	0	1	0	0	0	1	0	0	0	0	0	0	0	0	0
222749	21	0.8	23.05	0	0	0	0	1	0	0	0	1	0	0	0	0	0	0	0	0	0
222637	34	4	23.63	0	0	1	0	1	0	0	0	1	0	1	0	0	0	0	0	0	0
222092	29	6	20.96	0	0	1	0	1	0	0	0	1	0	0	0	0	0	0	0	0	0
234906	32	3	19.92	0	1	1	0	0	0	0	0	1	0	0	0	0	0	0	0	0	0
216914	44	1	22.03	0	0	1	0	1	0	0	0	1	0	0	0	1	0	0	0	0	0
236182	29	4	28.84	0	1	1	0	1	0	1	0	1	0	0	0	0	0	0	0	0	0
236201	27	3	24.61	0	0	1	0	0	0	0	1	1	0	0	0	1	0	1	0	0	0
222260	26	0.5	22.51	0	0	0	0	1	0	0	0	1	0	0	0	0	0	0	0	0	0
224991	30	4	20.06	0	0	1	1	1	0	0	0	1	0	0	0	0	0	0	0	0	0
226562	37	2.5	21.63	0	0	1	0	1	0	0	0	1	0	0	0	0	0	0	0	0	0
225019	26	8	26.04	0	0	1	0	0	0	0	1	1	0	0	0	0	0	1	0	0	0
222548	33	2	22.48	0	1	1	0	1	0	0	0	1	0	1	0	0	0	0	0	0	0
241437	32	2.5	20.43	0	1	1	0	1	0	0	0	1	0	0	0	0	0	0	0	0	0
241453	29	1.6	24.03	0	1	1	0	1	0	0	0	1	0	0	0	0	0	0	0	0	0
221036	26	4	23.23	0	0	1	0	1	0	0	0	1	0	0	0	1	0	0	0	0	0
241469	31	6	24.56	0	0	1	1	1	0	0	0	1	0	0	0	0	0	0	0	0	0
240827	37	9	30.84	0	0	1	0	1	0	0	0	1	0	0	0	0	0	0	0	0	0
242884	33	3	28	0	1	1	0	0	0	0	0	1	0	0	0	0	0	1	0	0	0
221275	33	2	18.59	0	0	1	0	1	0	0	0	1	0	0	0	0	0	0	0	0	0
242971	37	1	20.69	0	0	1	0	1	0	0	1	1	0	0	0	0	0	0	0	0	0
222474	35	2	22.04	0	1	1	0	0	0	0	0	1	0	0	0	0	0	0	0	0	0
222673	31	0.7	21.12	0	0	0	0	1	0	0	0	1	0	0	0	0	0	0	0	0	0
220341	35	2	26.67	0	0	1	0	1	0	0	0	1	0	0	0	0	0	0	0	0	1
243656	34	2	19.27	0	1	1	0	0	0	0	0	1	0	1	0	0	0	0	0	0	0
220526	42	2	21.33	0	0	1	0	0	0	0	0	1	0	0	0	0	0	0	0	0	0
242906	27	1	22.06	0	0	1	0	1	0	0	0	1	0	0	0	0	0	0	0	0	1
222433	29	3	21.78	0	0	1	0	1	0	0	0	1	0	0	0	0	0	0	0	0	0
[truncated: 205 more rows]
